1 **A *cis*-carotene derived apocarotenoid regulates etioplast and chloroplast development**

2

3 Christopher I Cazzonelli<sup>a,\*</sup>,<sup>1</sup>, Xin Hou<sup>b,\*</sup>, Yagiz Alagoz<sup>a</sup>, John Rivers<sup>b</sup>, Namraj Dhama<sup>a</sup>, Jiwon Lee<sup>c</sup>, Marri  
4 Shashikanth<sup>b</sup> and Barry J Pogson<sup>b, 1</sup>

5

6 **Affiliations:**

7 \* These two authors contributed equally

8 <sup>a</sup> Hawkesbury Institute for the Environment, Western Sydney University, Locked Bag 1797, Penrith  
9 NSW 2751, Australia.

10 <sup>b</sup> Australian Research Council Centre of Excellence in Plant Energy Biology, Research School of  
11 Biology, The Australian National University, Canberra, ACT 2601, Australia.

12 <sup>c</sup> Centre for Advanced Microscopy, The Australian National University, Canberra, ACT 2601, Australia

13

14 <sup>1</sup> Address correspondence to [barry.pogson@anu.edu.au](mailto:barry.pogson@anu.edu.au) and [c.cazzonelli@westernsydney.edu.au](mailto:c.cazzonelli@westernsydney.edu.au).

15 The author(s) responsible for distribution of materials integral to the findings presented in this article in  
16 accordance with the policy described in the Instructions for Authors ([www.plantcell.org](http://www.plantcell.org)) are: Barry  
17 Pogson ([barry.pogson@anu.edu.au](mailto:barry.pogson@anu.edu.au)) and Christopher Cazzonelli ([c.cazzonelli@westernsydney.edu.au](mailto:c.cazzonelli@westernsydney.edu.au))

18

19 The authors declare no conflict of interest

20 **Short Title:** Apocarotenoid control of plastid development

21 **One-sentence summary:** Carotenoids are not just required as core components for plastid biogenesis,  
22 they can be cleaved into an apocarotenoid signal that regulates etioplast and chloroplast development  
23 during extended periods of darkness.

24 **Key words:** carotenoid, post-transcriptional regulation, apocarotenoid signal, prolamellar body,  
25 etioplast, photoperiod

26 **ABBREVIATIONS**

27 *ccr* *carotenoid and chloroplast regulation*

28 *rccr2* revertant of *ccr2*

29 DAG days after germination

30 YL yellow leaf

31 GL green leaf  
32 NF norflurazon  
33 ACS apocarotenoid signal  
34

## 35 ABSTRACT

36 Carotenoids are core plastid components, yet a regulatory function during plastid biogenesis  
37 remains enigmatic. A unique carotenoid biosynthesis mutant, *carotenoid chloroplast regulation 2 (ccr2)*,  
38 that has no prolamellar body (PLB) and normal PROTOCHLOROPHYLLIDE OXIDOREDUCTASE  
39 (POR) levels, was used to demonstrate a regulatory function for carotenoids under varied dark-light  
40 regimes. A forward genetics approach revealed how an epistatic interaction between a  $\zeta$ -carotene  
41 isomerase mutant (*ziso-155*) and *ccr2* blocked the biosynthesis of specific *cis*-carotenes and restored  
42 PLB formation in etioplasts. We attributed this to a novel apocarotenoid signal, as chemical inhibition of  
43 carotenoid cleavage dioxygenase activity restored PLB formation in *ccr2* etioplasts during  
44 skotomorphogenesis. The apocarotenoid acted in parallel to the transcriptional repressor of  
45 photomorphogenesis, DEETIOLATED1 (DET1), to post-transcriptionally regulate  
46 PROTOCHLOROPHYLLIDE OXIDOREDUCTASE (POR), PHYTOCHROME INTERACTING  
47 FACTOR3 (PIF3) and ELONGATED HYPOCOTYL5 (HY5) protein levels. The apocarotenoid signal  
48 and *det1* complemented each other to restore POR levels and PLB formation, thereby controlling plastid  
49 development.

50

## 51 INTRODUCTION

52 Carotenoids are a diverse group of hydrophobic isoprenoid pigments required for numerous  
53 biological processes in photosynthetic organisms and are essential for human health (Cazzonelli, 2011;  
54 Baranski and Cazzonelli, 2016). In addition to providing plant flowers, fruits and seeds with distinct  
55 colours, carotenoids have accessory roles in facilitating the assembly of the light harvesting complex,  
56 light capture during photosynthesis and photoprotection during high light and/or temperature stress  
57 (Nisar et al., 2015; Baranski and Cazzonelli, 2016). The current frontiers are to discover the regulators  
58 of carotenoid biosynthesis, storage, and catabolism and apocarotenoids that in turn regulate plant  
59 development and photosynthesis (Cazzonelli and Pogson, 2010; Havaux, 2014; Baranski and Cazzonelli,  
60 2016; Hou et al., 2016).

61 In higher plants, *cis*-carotene biosynthesis is initiated by the condensation of two molecules of  
62 geranylgeranyl diphosphate (GGPP) to form phytoene, which is catalyzed by the rate-limiting enzyme  
63 phytoene synthase (PSY) (von Lintig et al., 1997; Li et al., 2008; Rodriguez-Villalon et al., 2009; Welsch  
64 et al., 2010; Zhou et al., 2015) (Supplementary Figure 1A). Next, phytoene desaturase (PDS),  $\zeta$ -carotene

65 desaturases (ZDS),  $\zeta$ -carotene isomerase (ZISO) and *cis-trans*-carotene isomerase (CRTISO) convert the  
66 colourless phytoene into the pinkish-red coloured all-*trans*-lycopene (Bartley et al., 1999; Isaacson et al.,  
67 2002; Park et al., 2002; Dong et al., 2007; Chen et al., 2010; Yu et al., 2011). In the dark, the isomerisation  
68 of tri-*cis*- $\zeta$ -carotene to di-*cis*- $\zeta$ -carotene and tetra-*cis*-lycopene to all-*trans*-lycopene has a strict  
69 requirement for ZISO and CRTISO activity respectively (Park et al., 2002; Chen et al., 2010). However,  
70 light-mediated photoisomerisation in the presence of a photosensitiser can substitute for a lack of  
71 isomerase activity (Giuliano et al., 2002; Vijayalakshmi et al., 2015; Alagoz et al., 2018).

72 The carotenoid biosynthetic pathway branches after lycopene to produce  $\alpha/\beta$ -carotenes  
73 (Cunningham et al., 1993; Cunningham et al., 1996; Pecker et al., 1996; Ronen et al., 1999). Next,  $\alpha$ -  
74 carotene and  $\beta$ -carotene are further hydroxylated to produce the oxygenated carotenoids called  
75 xanthophylls (e.g. lutein, violaxanthin and zeaxanthin), which comprise the most abundant carotenoids  
76 found in photosynthetic leaves. Carotenoids are precursors for apocarotenoids (carotenoid cleavage  
77 products) such as phytohormones abscisic acid (ABA) and strigolactone (SL) as well as other  
78 apocarotenoids that function in root-mycorrhizal interactions, leaf development, acclimation to  
79 environmental stress and retrograde signaling (Havaux, 2014; Walter et al., 2015; Chan et al., 2016; Hou  
80 et al., 2016). The carotenoid cleavage dioxygenase and nine-*cis*-epoxy-carotenoid dioxygenase  
81 (CCD/NCED) family cleave carotenoids to yield apocarotenoids (Hou et al., 2016). The CCDs have  
82 substrate preferences depending on the tissue and nature of the assay (Walter and Strack, 2011; Harrison  
83 and Bugg, 2014; Bruno et al., 2016). The five members of the NCED sub-group are exclusively involved  
84 in cleavage of violaxanthin and neoxanthin to form ABA (Finkelstein, 2013). The four CCDs have well  
85 defined roles in carotenoid degradation in seeds (CCD1 and CCD4) and the synthesis of strigolactones  
86 (CCD7/MAX3 and CCD8/MAX4) (Auldridge et al., 2006; Gonzalez-Jorge et al., 2013; Ilg et al., 2014;  
87 Al-Babili and Bouwmeester, 2015). Non-enzymatic oxidative cleavage of carotenoids can also generate  
88 apocarotenoids by singlet oxygen ( $^1\text{O}_2$ )-mediated photo-oxidation or by lipoxygenase and peroxidase-  
89 mediated co-oxidation (Leenhardt et al., 2006; Gonzalez-Perez et al., 2011). Non-enzymatic carotenoid  
90 degradation acts preferentially on selective molecules such as  $\beta$ -carotene and its apocarotenoid  
91 derivatives.

92 *cis*-carotenes such as phytoene, phytofluene and tetra-*cis*-lycopene are reported to be resistant to  
93 non-enzymatic degradation (Schaub et al., 2018), although there are some reports that CCDs cleave  
94 specific *cis*-carotenes *in vitro* (Bruno et al., 2016). Whether there is a physiological relevance for a *cis*-

95 carotene derived cleavage product or apocarotenoid signal (ACS) *in vivo*, remains unclear. A hunt is on  
96 to identify a *cis*-carotene cleavage product that functions as a retrograde signal to regulate nuclear gene  
97 expression (Kachanovsky et al., 2012; Fantini et al., 2013; Avendano-Vazquez et al., 2014; Alvarez et  
98 al., 2016). CCD4 is implicated in the generation of a *cis*-carotene-derived apocarotenoid signal that  
99 regulates leaf shape, chloroplast and nuclear gene expression in the Arabidopsis *clb5/zds* (chloroplast  
100 biogenesis-5 /  $\zeta$ -carotene desaturase) mutant (Avendano-Vazquez et al., 2014). A metabolon regulatory  
101 loop around all-*trans*- $\zeta$ -carotene was proposed in tomato fruit that can sense *cis*-carotene accumulation,  
102 their derivatives or the enzymes themselves (Fantini et al., 2013). The accumulation of *cis*-carotenes in  
103 tomato fruit have also been linked to the metabolic feedback-regulation of *PSY* transcription and  
104 translation (Kachanovsky et al., 2012; Alvarez et al., 2016). Therefore, *cis*-carotenes themselves or their  
105 cleavage products appear to have some functional roles, of which the targets and regulatory  
106 mechanism(s) remains unknown.

107 Determining a mechanistic function for *cis*-carotenes *in planta* has been challenged by low levels  
108 of *cis*-carotene accumulation in wild type tissues. Although, when the upper carotenoid pathway is  
109 perturbed (Alagoz et al., 2018), seedling lethality (*psy*, *pds* and *zds*), impaired chlorophyll and *cis*-  
110 carotene accumulation (*ziso* and *crtiso*) as well as a reduction in lutein (*crtiso*) become apparent (Isaacson  
111 et al., 2002; Park et al., 2002). *ziso* mutants in maize (*y9*) and Arabidopsis (*zic*) display pale-green zebra-  
112 striping patterns and a delay in cotyledon greening respectively, that resemble a leaf variegation  
113 phenotype (Janick-Buckner et al., 2001; Li et al., 2007; Chen et al., 2010). Similarly, *crtiso* loss-of-  
114 function in tomato (*tangerine*), melon (*yofi*) and rice (*zebra*) mutants show varying degrees of  
115 unexplained yellow leaf variegation (Isaacson et al., 2002; Park et al., 2002; Chai et al., 2010; Galpaz et  
116 al., 2013), the causes of which were assumed to relate to perturbed photosystem biogenesis and operation.

117 During skotomorphogenesis prolamellar bodies (PLB) develop in etioplasts of seedling tissues.  
118 The PLB is a crystalline agglomeration of protochlorophyllide (PChlide), POR enzyme and fragments  
119 of pro-thylakoid membranes that provide a structural framework for the light-catalysed conversion of  
120 PChlide into chlorophylls by POR within picoseconds in conjunction with the assembly of the  
121 photosynthetic apparatus (Sundqvist and Dahlin, 1997; Sytina et al., 2008). The de-etiolation of seedlings  
122 upon exposure to light activates a sophisticated network consisting of receptors, genetic and biochemical  
123 signals that trigger photomorphogenesis. Changes in light-induced morphogenesis include: short  
124 hypocotyls; expanded and photosynthetically-active cotyledons with developing chloroplasts; and self-  
125 regulated stem cell populations at root and shoot apices (Arsovski et al., 2012; Lau and Deng, 2012).

126 Mutants that block skotomorphogenesis and instead promote photomorphogenesis in the dark, such as  
127 DETIOLATED1 (DET1) and CONSTITUTIVE PHOTOMORPHOGENIC 1 (COP1) lack POR and thus  
128 fail to assemble PLBs (Chory et al., 1989; Sperling et al., 1998; Datta et al., 2006)(Supplementary Figure  
129 1B). This is a consequence of DET1 modulating the levels of PHYTOCHROME INTERACTING  
130 FACTOR 3 (PIF3; constitutive transcriptional repressor of photomorphogenesis) and ELONGATED  
131 HYPOCOTYL 5 (HY5; positive transcriptional regulator of photomorphogenesis) to control PORA and  
132 *PhANG* expression (Stephenson et al., 2009; Lau and Deng, 2012; Xu et al., 2016; Llorente et al., 2017).  
133 Thus, in the dark wild-type plants accumulate PIF3, but lack HY5, conversely *det1* lacks PIF3 and  
134 accumulates HY5 protein (Supplementary Figure 1B).

135 PLB formation occurs in carotenoid deficient mutants. Norflurazon treated wheat seedlings  
136 grown in darkness can still form a PLB, however it is somewhat aberrant having a looser attachment of  
137 POR to the lipid phase and there is an early dissociation from the membranes during photomorphogenesis  
138 (Denev et al., 2005). In contrast, *ccr2* is similar to *cop1/det1* mutants in that it lacks a PLB in etioplasts,  
139 yet it is unique in having normal PChlide and POR protein levels (Park et al., 2002). The associated hyper  
140 accumulation of *cis*-carotenes led to the untested hypothesis that *cis*-carotenes structurally prevent PLB  
141 formation in etioplasts of dark germinated *ccr2* during skotomorphogenesis and this in turn delayed  
142 cotyledon greening following illumination (Park et al., 2002; Datta et al., 2006; Cuttriss et al., 2007).  
143 However, it was never apparent why other linear carotenes, such as 15-*cis*-phytoene and all-*trans*-  
144 lycopene, permitted PLB formation, raising the question as to whether there were regulatory functions  
145 for the *cis*-carotenes that accumulate in *ccr2*.

146 In this paper, we describe how changes in photoperiod are sufficient to perturb or permit plastid  
147 development in *ccr2*, the former leading to leaf variegation. A revertant screen of *ccr2* revealed new  
148 connections between a *cis*-carotene-derived signaling metabolite, PLB formation, skotomorphogenesis  
149 and chloroplast development. We demonstrate how an unidentified apocarotenoid signal acts in parallel  
150 to DET1 to regulate PLB formation and post-transcriptionally control POR, PIF3 and HY5 protein levels  
151 in order to fine-tune plastid development in tissues exposed to extended periods of darkness.

152

## 153 RESULTS

### 154 *A shorter photoperiod perturbs chloroplast biogenesis and promotes leaf variegation*

155 The *crtiso* mutants have been reported to display different leaf pigmentation phenotypes (resembling  
156 variegations of yellow and green sectors) in a species-dependant manner, with rice and tomato showing  
157 changes in pigmentation, but not Arabidopsis. To address if this is species-dependent we investigated if  
158 light regimes affected leaf pigment levels and hence plastid development in Arabidopsis *crtiso* mutants.  
159 Growing *ccr2* plants at a lower light intensity of 50  $\mu$ E during a long 16 h photoperiod did not cause any  
160 obvious changes in morphology or leaf variegation (Supplemental Figure 2A). Whereas, reducing the  
161 photoperiod to 8 h resulted in the newly emerged *ccr2* leaves to appear yellow in variegation  
162 (Supplemental Figure 2B) due to a substantial reduction in total chlorophyll (Supplemental Figure 2D).  
163 As development progressed the yellow leaf (YL) phenotype became less obvious and greener leaves  
164 (GL) developed (Supplemental Figure 2C). Therefore, by reducing the photoperiod we were able to  
165 replicate in Arabidopsis previous reports in tomato and rice of leaf variegation (Isaacson et al., 2002;  
166 Chai et al., 2010).

167 Next, we demonstrated that day length affects plastid development in newly emerged leaf tissues  
168 undergoing cellular differentiation. We replicated the YL phenotype by shifting three weeks old *ccr2*  
169 plants from a long 16-h to shorter 8-h photoperiod (Figure 1A-B). The newly emerged leaves of *ccr2*  
170 appeared yellow and virescent, while leaves that developed under a 16-h photoperiod remained green  
171 similar to wild type (Figure 1B). Consistent with the phenotype, the yellow sectors of *ccr2* displayed a  
172 2.4-fold reduction in total chlorophyll levels, while mature green leaf sectors formed prior to the  
173 photoperiod shift had chlorophyll levels similar to that of WT (Figure 1C). The chlorophyll *a/b* as well  
174 as carotenoid/chlorophyll ratios were not significantly different (Figure 1C). Consistent with the  
175 reduction in chlorophyll, total carotenoid content in yellow sectors of *ccr2* was reduced due to lower  
176 levels of lutein,  $\beta$ -carotene and neoxanthin (Figure 1D). The percentage composition of zeaxanthin and  
177 antheraxanthin was significantly enhanced in yellow sectors, perhaps reflecting a greater demand for  
178 xanthophyll cycle pigments that reduce photooxidative damage (Supplemental Figure 2E). Transmission  
179 electron microscopy (TEM) revealed that yellow *ccr2* leaf sectors contained poorly differentiated  
180 chloroplasts lacking membrane structures consisting of thylakoid and grana stacks, as well as appearing  
181 spherical in shape, rather than oval when compared to green leaf tissues from WT or *ccr2* (Figure 1E).

182

### 183 ***The leaf variegation phenotype correlated with cis-carotene accumulation***

184 We next investigated the relationship between photoperiod, perturbations in carotenogenesis and  
185 plastid development. Green leaf tissues from *ccr2* have an altered proportion of  $\beta$ -xanthophylls at the  
186 expense of less lutein, yet plants grown under a longer photoperiod show normal plastid development  
187 (Park et al., 2002). This raised a question: does reducing the photoperiod limit the photoisomerisation of  
188 tetra-*cis*-lycopene to all-*trans*-lycopene thereby altering lutein, ABA and/or strigolactone biosynthesis?  
189 To address this, *ccr2*, *lycopene epsilon cyclase* (*lut2*; *lutein deficient 2*), *zeaxanthin epoxidase* (*aba1-3*;  
190 *aba deficient 1*) and *carotenoid cleavage dioxygenase 8* (*max 4*; *more axillary branching 4*) mutants were  
191 shifted from a 16-h to 8-h photoperiod (Figure 2A). *ccr2* showed a clear yellow variegation phenotype,  
192 while the other mutants produced green leaves similar to that of WT. Therefore, we could not attribute  
193 the yellow leaf colour variegation to a reduction in lutein or a perturbation of SL or ABA biosynthesis.

194 Next, we tested if the *ccr2* yellow leaf phenotype was linked to the accumulation of *cis*-carotenes in  
195 the pathway upstream of all-*trans*-lycopene. Mutations in *PSY*, *PDS* and *ZDS* cause leaf bleaching and  
196 are not viable in soil. Alternatively, *carotenoid chloroplast regulator 1* (*ccr1* or otherwise known as  
197 *sdg8*; *set domain group 8*) and  $\zeta$ -*carotene isomerase* (*ziso*) mutants are viable and accumulate *cis*-  
198 carotenes in etiolated tissues (Cazzonelli et al., 2009b; Chen et al., 2010). Indeed, both *ccr1* and *ziso*  
199 displayed a partial yellow leaf phenotype near the zone of cellular differentiation (e.g. petiole-leaf  
200 margin), however unlike *ccr2* the maturing leaf tissues restore greening rapidly such that *ziso* was more  
201 similar to WT than *ccr2* (Figure 2A).

202 This raised a question: does a shorter photoperiod lead to the accumulation of *cis*-carotenes in newly  
203 emerged leaf tissues of *ccr2* displaying altered plastid development? First, we tested if an extended dark  
204 period (6 days) would result in the accumulation of *cis*-carotenoids in mature (3 weeks) rosette leaf  
205 tissues. Compared to adult WT prolonged darkness resulted in notable yellowing of *ccr2* leaves and  
206 clearly discernible accumulation of tetra-*cis*-lycopene, neurosporene isomers,  $\zeta$ -carotene, phytofluene  
207 and phytoene (Figure 2B). We next shifted three-week-old plants from a 16-h to 8-h photoperiod and the  
208 yellow sectors from newly emerged *ccr2* leaves accumulated detectable levels of *cis*-lycopene,  
209 neurosporene isomers,  $\zeta$ -carotene, phytofluene and phytoene (Figure 2C). Interestingly, even when plants  
210 were grown under a 16-h photoperiod, we could detect phytofluene and phytoene in floral buds as well  
211 as newly emerged rosette leaves from *ccr2*, and at trace levels in WT (Figure 2D). In addition, a higher



212 ratio of phytofluene and phytoene relative to  $\beta$ -carotene was observed in newly emerged *ccr2* tissues,  
213 which coincided with a lower percentage of lutein when compared to older tissues (**Supplemental Table**  
214 **1**).

215

### 216 ***Second site genetic reversion restored plastid development in ccr2***

217 We undertook a revertant screen to identify genes and proteins that could complement the plastid  
218 development in *ccr2*, while still maintaining a perturbed carotenoid profile. Seeds were mutagenized  
219 using ethyl-methane sulfonate (EMS), grown and collected from pools of 5-10  $M_1$  plants. Approximately  
220 40,000  $M_2$  seedlings from 30 stocks of pooled seeds were screened for the emergence of immature green  
221 rosette leaves when grown under a 10-h photoperiod. Twenty-five revertant lines reproducibly displayed  
222 green immature leaves in response to a photoperiod shift, as exemplified by *rccr2<sup>154</sup>* and *rccr2<sup>155</sup>* (**Figure**  
223 **3A**). Leaf tissues of all *rccr2* lines contained reduced lutein and xanthophyll composition similar to *ccr2*  
224 (**Figure 3B**). When grown under a shorter photoperiod, *rccr2* lines produced greener rosettes with less  
225 yellow colour variegation compared to *ccr2* and chlorophyll levels were similar to WT (**Figure 3C-D**).

226 In order to establish a segregating population for next generation mapping (NGM) *rccr2* lines  
227 were backcrossed to the original *ccr2* parent (Col-0) and/or a *ccr2* line established in the Landsberg  
228 erecta background (*Lccr2*). All *rccr2* lines were recessive for the reversion of shorter photoperiod  
229 dependent yellow leaves (e.g. *rccr2<sup>154</sup>* and *rccr2<sup>155</sup>*; **Figure 3E**). Next generation sequencing (NGS)  
230 technologies were used to deep sequence the genomic DNA (gDNA) from leaves of homozygous ( $M_2$ )  
231 plants to identify non-recombinant deserts in chromosome 1 (3605576 bp) and chromosome 4 (6346463  
232 bp) for both *rccr2<sup>155</sup>* and *rccr2<sup>154</sup>*, respectively (**Figure 3F-G**). Both non-recombinant deserts contained  
233 SNPs displaying a discordant chastity value of approximately 1.0 representing the causal mutation of  
234 interest (Austin et al., 2011).

235

### 236 ***An epistatic interaction between ziso and ccr2 revealed specific cis-carotenes perturb PLB formation***

237 *rccr2<sup>155</sup>* lacked recombination at the bottom arm of chromosome 1 surrounding a single nucleotide  
238 polymorphism (G-A mutation at 3606630 bp) within exon 3 of the *ZISO* gene (639 bp of mRNA),  
239 hereafter referred as *ccr2 ziso-155* (**Figure 4A**). This polymorphism caused a premature stop codon  
240 leading to a truncated *ZISO* protein (212 instead of 367 amino acids). The overexpression of the  
241 functional *ZISO* cDNA fragment in *ccr2 ziso-155* restored the leaf variegation phenotype displayed by

242 *ccr2* plants grown under an 8-h photoperiod (Figure 4B). A double mutant generated by crossing *ccr2*  
243 with *ziso1-4* further confirmed the loss-of-function in *ziso* can restore plastid development in newly  
244 emerged immature leaves of *ccr2*. Carotenoid analysis of immature leaf tissues of *ccr2 ziso-155* revealed  
245 reduced lutein and xanthophyll composition similar to *ccr2*, indicating that the complementation of the  
246 YL was not due to a change in xanthophyll levels (Figure 3B). The epistatic nature between *ziso* and  
247 *ccr2* revealed that a specific *cis*-carotene downstream of *ZISO* activity perturbed plastid development.

248 Analysis of the *cis*-carotene profile in etiolated cotyledons showed that *ccr2 ziso1-4* had an  
249 identical carotenoid profile to that of *ziso* in that it could only accumulate 9,15,9'-tri-*cis*- $\zeta$ -carotene,  
250 phytofluene and phytoene (Figure 4C). In contrast, *ccr2* accumulated lower levels of these three  
251 compounds, yet higher quantities of 9, 9'-di-*cis*  $\zeta$ -carotene, 7,9,9'-tri-*cis*-neurosporene and 7,9,9',7'-tetra-  
252 *cis*-lycopene, all of which were undetectable in a *ziso* background (Figure 4C). Therefore, *ziso* blocks  
253 the biosynthesis of neurosporene isomers, tetra-*cis*-lycopene and 9, 9'-di-*cis*  $\zeta$ -carotene under shorter  
254 photoperiods, and they themselves or their cleavage products appear to disrupt plastid development in  
255 *ccr2*.

256 How are the specific *cis*-carotenes disrupting plastid development? To answer this question, we  
257 first examined etiolated cotyledons of WT, *ccr2*, *ziso* and *ccr2 ziso-155*. We confirmed *ccr2* lacked a  
258 PLB in all sections examined (Figure 4D, Supplemental Table 2). We observed 65% of *ziso* etioplasts  
259 contained PLBs (Figure 4D, Supplemental Table 2). Intriguingly, the vast majority (>94%) of etioplasts  
260 examined from *ccr2 ziso-155* and *ccr2 ziso1-4* contained a PLB (Figure 4D, Supplemental Table 2).  
261 Cotyledon greening of de-etiolated seedlings revealed a significant delay in chlorophyll accumulation  
262 for both *ccr2* and *ziso1-4* when compared to WT after 24, 48 and 72 h of continuous white light (Figure  
263 4E). The reduced levels of chlorophyll in *ziso* were not as severe as *ccr2*, consistent with *ziso* showing a  
264 slight virescent phenotype in comparison to *ccr2* (Figure 2A). Cotyledons of the *ccr2 ziso-155* and *ccr2*  
265 *ziso1-4* double mutants accumulated levels of chlorophyll similar to that of WT, 48 and 72 h following  
266 de-etiolation (Figure 4E). We conclude that a specific *cis*-carotene produced in *ccr2* prevents PLB  
267 formation during skotomorphogenesis and perturbs chloroplast development.

268

### 269 ***The activation of photosynthesis associated nuclear gene expression restores PLB formation in ccr2***

270 The transcriptomes of WT, *ccr2* and *ccr2 ziso-155* etiolated seedlings (ES), yellow emerging  
271 juvenile leaves (JL) from *ccr2*, and green JL leaves from WT and *ccr2 ziso-155* were assessed using

272 RNA sequencing analysis. Compared to WT there were 2- to 4-fold less differentially expressed (DE)  
273 genes in *ccr2* (ES;191 and JL;1217) than for *ccr2 ziso-155* (ES;385 and JL;5550). Gene ontology (GO)  
274 analysis revealed a DE gene list significantly enriched in metabolic processes and stress responses in  
275 both tissue types of *ccr2*. Etiolated tissues of *ccr2* showed DE genes enriched in photosynthetic processes  
276 (17/191; FDR < 3.8x10<sup>-6</sup>) that were not apparent in *ccr2 ziso-155*, which had DE genes more responsive  
277 to a stimulus (134/382; FDR < 3.7x10<sup>-7</sup>) involving hormones and abiotic stress (Supplemental Table 3).  
278 Juvenile leaves of both *ccr2* and *ccr2 ziso-155* showed a significant enrichment in DE genes also  
279 responsive to a stimulus (470/1212; FDR < 2.4x10<sup>-34</sup> and 1724/5510; FDR < 5.4x10<sup>-43</sup>, respectively)  
280 involving several hormones and stress. Even more intriguing was the enhanced enrichment of DE genes  
281 specific to *ccr2 ziso-155* juvenile leaves that were involved in biological regulation (1623/5510; FDR <  
282 4.2x10<sup>-30</sup>) and epigenetic processes (184/5510; FDR < 3.1x10<sup>-11</sup>) such as DNA methylation, histone  
283 modification and gene silencing (Supplemental Table 4).

284 We utilised Genevestigator to compare DE genes in etiolated seedlings of *ccr2* and *ccr2 ziso-155*  
285 with that of mutant germplasm growing on MS media +/- chemical treatments in an attempt to identify  
286 co- or contra- changes of gene expression (>20% overlap) (Supplemental Table 3). Norflurazon, a  
287 carotenoid inhibitor of PDS activity and inducer of a retrograde signal(s) was able to induce 30-35% of  
288 DE genes in *ccr2*, which was not apparent in *ccr2 ziso-155* (12-14%). An unexpected finding was the  
289 DE genes in *ccr2* shared 31-42% in common with the *cop9* and *cop1* mutants, which *ccr2 ziso-155*  
290 contra-regulated in *cop9*, but not *cop1*. Genes regulated during light-mediated germination were contra-  
291 expressed in *ccr2* (28-48%), yet co-expressed in *ccr2 ziso-155* (44-48%).

292 We next searched for differentially expressed genes in *ccr2* that were attenuated or contra-  
293 expressed in the *ccr2 ziso-155*. Twenty contra-expressed genes were identified to be enriched in process  
294 related to photosynthesis, pigment biosynthesis and light regulation (5/20; FDR < 1.2x10<sup>-4</sup>) (Supplemental  
295 Table 5). Photomorphogenesis associated nuclear gene (*PhMoANG*) expression (e.g. *DET1*, *COP1*) was  
296 up-regulated in *ccr2*, yet down-regulated in *ccr2 ziso-155*. This finding is consistent with the fact that  
297 DE genes miss-expressed in *ccr2 ziso-155* leaf tissues were enriched in chromatin modifying processes.  
298 *det1.1* mutants were shown to have reduced *PIF3* transcripts, and higher *HY5* protein levels that activate  
299 downstream *PhANG* expression (Supplemental Table 6)(Lau and Deng, 2012). Indeed, our comparative  
300 analysis of contra-expressed genes in *ccr2 ziso-155* revealed the down-regulation of *PIF3*, up-regulation  
301 of *HY5* and *PHANG* expression (e.g. *DXS*, *CLB6*, *LHCBI*, *LHCB2*, *RBCS*, *GUN5*) (Supplemental Table  
302 6). It is not unusual to observe miss-regulation of *PhANG* expression in mutants having impaired plastid

303 development (Ruckle et al., 2007; Woodson et al., 2011). In summary, the repression of negative  
304 regulators of photomorphogenesis, correlates well with the up-regulation of *PhANG* expression in *ccr2*  
305 *ziso-155* and links *cis*-carotene accumulation to gene targets plastid development.

306

### 307 ***Activation of photomorphogenesis by det1-154 restores plastid development in ccr2***

308 We searched the SNP deserts of the remaining 24 *rccr2* lines for genes that could link *cis*-carotene  
309 signalling to regulators of photomorphogenesis. *rccr2*<sup>154</sup> was mapped to a mutation in de-etiolated 1  
310 (*det1*), hereafter referred as *ccr2 det1-154*, which restored plastid development in immature *ccr2* leaves  
311 (Figure 3). Sequencing of the *det1-154* gDNA identified a G to A point mutation at the end of exon 4.  
312 Sequencing of the *det1-154* cDNA revealed the removal a 23 amino acid open reading frame due to  
313 alternate splicing (Figure 5A). Quantitative PCR analysis confirmed that the shorter *DET1-154* transcript  
314 (spliced and missing exon 4) was highly enriched (approx. 200 fold) in *ccr2 det1-154*, while the normal  
315 *DET1-154* transcript (contains exon 4) was repressed in *ccr2 det1-154* (Supplemental Figure 3A). The  
316 phenotypes of *ccr2 det1-154* and *det1-154* were intermediate to that of *det1-1* (Chory et al., 1989)  
317 showing a smaller rosette with a shorter floral stem height and reduced fertility relative to the WT  
318 (Supplemental Figure 3B). The overexpression of the full length *DET1* transcript (*CaMV35s::DET1-OE*)  
319 in *ccr2 det1-154* restored the virescent phenotype in *ccr2* leaves from plants grown under an 8-h  
320 photoperiod (Figure 5B). Therefore, alternative splicing of *det1* and removal of exon 4 appeared  
321 sufficient to restore plastid development in *ccr2* leaves grown under a shorter photoperiod.

322 We investigated how *det1-154* can restore plastid development in *ccr2*. *ccr2 det1-154* mature  
323 leaves contained less carotenoids and chlorophylls compared to *ccr2* (Supplemental Figure 3C). That is,  
324 the xanthophylls and  $\beta$ -carotene were all significantly reduced by *det1-154*. *det1-154* also reduced total  
325 *cis*-carotene content in *ccr2* etiolated cotyledons (Figure 5C; Supplemental Figure 3D). However, only  
326 tri-*cis*- $\zeta$ -carotene, pro-neurosporene and tetra-*cis*-lycopene were significantly reduced in *ccr2 det1-154*,  
327 phytoene and phytofluene levels were not significantly different to *ccr2* (; Supplemental Figure 3D). *ccr2*  
328 prevented PLB formation during skotomorphogenesis, yet displayed no obvious phenotype that  
329 resembled photomorphogenic mutants (Table 1). TEM confirmed that the dark-grown cotyledons from  
330 etiolated *ccr2 det1-154* seedlings showed PLBs in 69% of etioplasts examined during  
331 skotomorphogenesis (Table 1; Supplemental Figure 3E). The restoration of a PLB in *ccr2 det1-154* dark  
332 grown seedlings coincided with a restoration of cotyledon greening following de-etiolation (Figure 5E).

333 In leaves and etiolated cotyledons, *det1* mutants reduced total carotenoid and/or chlorophyll content  
334 when compared to WT (Supplemental Table 7). That is, the xanthophylls and  $\beta$ -carotene were all  
335 significantly reduced in *det1* mutants. We detected traces of phytoene and phytofluene in emerging leaves  
336 and in addition tri-*cis*- $\zeta$ -carotene at higher levels in etiolated cotyledons of *det1* mutants (Supplemental  
337 Table 7). *det1-154* activated photomorphogenesis in *ccr2* as evident by etiolated seedlings having  
338 characteristic shorter hypocotyl, no apical hook and opened large cotyledons similar to *det1-1* (Figure  
339 5D), which agrees with our transcriptomic data whereby *ccr2 det1-154* lead to a repression of *det1* and  
340 activation of *PhANGs* (Supplemental Table 6). Therefore, the reduction of the full length *DET1* mRNA  
341 in *ccr2* caused a reduction in specific *cis*-carotenes and restored PLB formation (Table 1).

342

### 343 ***D15 inhibition of carotenoid cleavage activity reveals a cis-carotene cleavage product controls PLB*** 344 ***formation.***

345 A question remained as to whether the accumulation of specific *cis*-carotenes lead directly to PLB  
346 perturbation as hypothesised (Park et al., 2002), or production of an apocarotenoid signal that could  
347 regulate PLB formation. We crossed *ccr2* to carotenoid cleavage dioxygenase loss-of-function mutants;  
348 *ccd1*, *ccd4*, *ccd7* (*max3*) and *ccd8* (*max4*) and tested if plants exposed to a shorter photoperiod would  
349 revert the virescent leaf phenotype of *ccr2*. We analysed more than 10 plants for each of the *ccr2 ccd*  
350 double mutant lines and observed a perturbation in plastid development in >93% of plants, each  
351 displaying clearly visible yellow virescent leaves similar to *ccr2* (Supplemental Figure 4A-B). We  
352 concluded that no single *ccd* mutant was sufficient to block the production of any *cis*-carotene derived  
353 cleavage product. However, there is a degree of functional redundancy among family members, as well  
354 as multiple cleavage activities and substrate promiscuity (Hou et al., 2016).

355 To address this challenge we decided to utilise the aryl-C3N hydroxamic acid compound (D15),  
356 which is a specific inhibitor (>70% inhibition) of 9,10 cleavage enzymes (CCD) rather than 11,12  
357 cleavage enzymes (NCED) (Sergeant et al., 2009; Van Norman et al., 2014). We imaged etioplasts from  
358 WT and *ccr2* etiolated seedlings treated with an optimal concentration of D15 (Van Norman et al., 2014).  
359 The majority (86%) of D15-treated *ccr2* etioplasts displayed a PLB, whilst in control treatments *ccr2*  
360 etioplasts showed no discernible PLB (Figure 6A; Supplemental Table 2). Total PChlide levels in WT  
361 and *ccr2* after D15 treatment were similar (Figure 6B). As expected, etiolated *ccr2* seedlings grown on  
362 D15-treated MS media accumulated chlorophyll in cotyledons within 24-h of continuous light treatment

363 following de-etiolation in a manner similar to WT (Figure 6C). D15 significantly enhanced di-*cis*- $\zeta$ -  
364 carotene and pro-neurosporene, yet reduced tetra-*cis*-lycopene in etiolated cotyledons of *ccr2* (Figure  
365 6D). In WT etiolated cotyledons, D15 significantly enhanced violaxanthin, neoxanthin and  
366 antheraxanthin content, which has previously been shown to also occur in Arabidopsis roots (Van  
367 Norman et al., 2014)(Figure 6E). Treatment of dark and light grown wild type seedlings with D15 did  
368 not cause adverse pleiotropic effects on germination, hypocotyl elongation and/or plastid development  
369 in cotyledons (Figure 6, Table 1, Supplemental Table 2). Therefore, apocarotenoid formation from either  
370 cleavage of di-*cis*- $\zeta$ -carotene and/or pro-neurosporene in *ccr2* can perturb PLB formation independent  
371 of PChlide biosynthesis.

372

### 373 *A cis-carotene cleavage product acts downstream of DET1 to post-transcriptionally regulate protein* 374 *levels*

375 We searched for a transcriptional regulatory mechanism by which a *cis*-carotene cleavage product  
376 could control PLB formation during skotomorphogenesis. *PORA* transcript levels are relatively high in  
377 etiolated seedlings, becoming down-regulated upon exposure to white light or when photomorphogenesis  
378 is activated by *det1-1* (Armstrong et al., 1995; Sperling et al., 1998). PIF3 and HY5 are key regulatory  
379 transcription factors involved in controlling downstream *PhANG* expression during the dark to light  
380 transition (Osterlund et al., 2000; Dong et al., 2014). A reduction in *PORA* and *PIF3* has been shown to  
381 perturb PLB formation. In etiolated tissues of *ccr2 det1-154*, which harbour etioplasts containing a PLB,  
382 the transcript levels of *PORA*, *PORB*, *PIF3* and *HY5* were substantially reduced. D15 treatment did not  
383 affect the expression levels of these genes in either WT or *ccr2 det1-154* (Figure 7A), therefore, *cis*-  
384 carotene cleavage does not appear to directly affect the transcriptional regulation of these genes.

385 We then searched for a change in POR protein in dark grown seedlings, with or without D15,  
386 noting that wild-type and *ccr2* accumulated POR (Park et al., 2002) and *det1* lacked POR (Sperling et  
387 al., 1998)(Supplementary Figure 1B). Under the electrophoresis conditions used herein, the Arabidopsis  
388 PORA/B proteins were detected as a single immunoreactive signal (PORA; 37 kDa, and PORB; 36 kD)  
389 (Sperling et al., 1998; Park et al., 2002; Paddock et al., 2012) (Figure 7B). A substantial increase in POR  
390 was observed in *ccr2*, which was reduced back to WT levels by D15 (Figure 7B). *ccr2 det1-154*  
391 accumulated wild-type levels of POR (Figure 7B), complementing the reported lack of POR in etiolated  
392 *det1* tissues (Sperling et al., 1998)(Supplementary Figure 1B). Intriguingly, treatment of *ccr2 det1-154*

393 with D15 reverted POR levels back to those expected for *det1*. This was not due to *ccr2* or D15 changing  
394 DET1 protein levels (Figure 7C). Therefore, *cis*-carotene cleavage mediates a signal that elevates POR  
395 accumulation in *det1*.

396 DET1 is a negative regulator of photomorphogenesis, such that *det1* mutants lack PIF3 and  
397 accumulate HY5 protein levels during skotomorphogenesis (Osterlund et al., 2000; Dong et al.,  
398 2014)(Supplementary Figure 1B). We questioned if the apocarotenoid signal acted upstream of the PIF3-  
399 HY5 regulatory hub that controls *PhANG* expression, noting that wild-type has high levels of PIF3 and  
400 low or trace levels of HY5, with the converse in *det1* (Dong et al., 2014) (Supplementary Figure 1B).  
401 PIF3 levels increased and HY5 decreased in both *ccr2* and *ccr2 det1-154* etiolated cotyledons and this  
402 was reverted by D15 treatment (Figure 7D). This indicates that an apocarotenoid signal can post-  
403 transcriptionally change the PIF3 / HY5 ratio in the presence or absence of DET1, indicating it is acting  
404 either in parallel with, or downstream of, DET1. The relative difference in PIF3 levels in *ccr2* compared  
405 to *ccr2 det1-154* in the presence of D15 would suggest the two pathways operate in parallel.

406

## 407 DISCUSSION

408 Plastid and light signalling coordinate leaf development under various photoperiods, and younger  
409 leaves display a greater plasticity to modulate their pigment levels in response to environmental change  
410 (Lepisto and Rintamaki, 2012; Dhimi et al., 2018). We attribute *ccr2* leaf variegation to the fine-tuning  
411 of plastid development in meristematic cells as a consequence of *cis*-carotene accumulation and not the  
412 generation of singlet oxygen (Kato et al., 2009; Chai et al., 2010; Han et al., 2012). Our evidence revealed  
413 that leaf variegation is linked to the hyper-accumulation of specific *cis*-carotenes since, *ziso-155* and  
414 *det1-154* as well as D15 were able to reduce *cis*-carotene biosynthesis in *ccr2* tissues, as well as restore  
415 leaf greening in plants grown under a shorter photoperiod (Figures 4,5). A shorter photoperiod maybe a  
416 seasonal factor capable of triggering *cis*-carotene hyper-accumulation in newly emerged photosynthetic  
417 tissues when CRTISO activity is perturbed, and cause leaf variegation. The altered plastid development  
418 in etiolated cotyledons and younger virescent leaves from *ccr2* cannot be attributed to a block in lutein,  
419 strigolactone, ABA or alteration in xanthophyll composition (Figure 2). Phytoene, phytofluene and to a  
420 lesser extent  $\zeta$ -carotene were noted to accumulate in wild type tissues from different plant species  
421 (Alagoz et al., 2018). We also detected traces of these *cis*-carotenes in newly emerged leaves from wild  
422 type, and even more so in *det1* mutants. Without the signal itself to assess the physiological function in

423 wild-type plant tissues, we provided evidence for the existence of a *cis*-carotene cleavage product in *ccr2*  
424 that can regulate PLB formation during skotomorphogenesis and plastid development during leaf  
425 greening independent of, and capable of compensating for mutations in DET1 (Figure 8A). We contrast  
426 how the *cis*-carotene derived novel apocarotenoid signal, in parallel with DET1 can post-transcriptionally  
427 control repressor and activator proteins that mediate the expression of a similar set of *PhANGs* in both  
428 the etioplast and chloroplast.

#### 429 430 ***A cis-carotene derived cleavage product regulates plastid development***

431 Due to their hydrophobicity and *cis*-configuration, *cis*-carotenes were proposed to function as a  
432 membrane-bound structural inhibitor of PLB formation during skotomorphogenesis (Park et al., 2002;  
433 Cuttriss et al., 2007). Instead, we demonstrate here that *ccr2* generated a *cis*-carotene-derived cleavage  
434 product, as D15 chemical inhibition of CCD activity (Figure 8A) restored PLB formation (85%) in *ccr2*  
435 etioplasts (Figure 6). This is in agreeance with evidence showing *cis*-carotenes are cleavable *in vitro* by  
436 CCD7 enzymatic activity (Bruno et al., 2016) and that CCD4 activity is necessary for generation of a  
437 *cis*-carotene derived apocarotenoid signal in *zds/club5*, that affected leaf development (Avendano-  
438 Vazquez et al., 2014). However, loss-in-function of *ccd1*, *ccd4*, *ccd7* and *ccd8* were not sufficient to  
439 restore plastid development and prevent leaf variegation in *ccr2* (Supplemental Figure 4). So, we  
440 conclude that there must be some redundancy among two or more CCDs in generating a *ccr2* derived  
441 apocarotenoid signalling metabolite that controls plastid development.

442 Which *cis*-carotene is the precursor for the apocarotenoid signal? Treatment with NF (Figure 8A)  
443 restored PLB formation in *ccr2* etioplasts (Cuttriss et al., 2007), which ruled out both phytoene and  
444 phytofluene as substrates for the generation of a cleavage product. Here we show *ZISO* restored PLB  
445 formation and cotyledon greening in *ccr2* ruling out tri-*cis*- $\zeta$ -carotene and revealing that di-*cis*- $\zeta$ -  
446 carotene, pro-neurosporene isomers and/or tetra-*cis*-lycopene are likely candidates (Figure 4). *ccr2 det1-*  
447 *154* displayed a substantial reduction in pro-neurosporene and tetra-*cis*-lycopene, and to a lesser extent  
448 di-*cis*  $\zeta$ -carotene (Supplemental Figure 3). Tetra-*cis*-lycopene accumulated in variegated leaves from the  
449 rice *zebra* mutant (Han et al., 2012). However, in the presence of D15 and hence absence of any  
450 enzymatic cleavage, only di-*cis*- $\zeta$ -carotene and pro-neurosporene accumulated, not tetra-*cis*-lycopene  
451 (Figure 6). Based on the evidence to date, we consider pro-neurosporene and perhaps di-*cis*- $\zeta$ -carotene  
452 are preferred substrate(s) for *in vivo* cleavage into a signaling metabolite.



453

454 ***A cis-carotene cleavage product controls PLB formation independent of GUN activity***

455 One question is whether the proposed apocarotenoid requires GUN activity to regulate PLB  
456 formation and/or *PhANG* expression? Given that *gun1* etioplasts contain PLBs, then that aspect of the  
457 *ccr2* phenotype is not GUN-related (Susek et al., 1993; Xu et al., 2016). Additionally, there were  
458 relatively few differentially expressed genes in common between *ccr2* etiolated seedlings and *gun1/gun5*  
459 seedlings treated with norflurazon (Supplemental Table 6) and none of the 25 revertants were in genic  
460 regions to which *GUN* genes are located. Norflurazon treatment of etiolated tissues does not affect PLB  
461 formation in wild type, but can restore PLB formation in *ccr2* (Cuttriss et al., 2007; Xu et al., 2016).  
462 Lincomycin treatment, on the other hand can suppress PLB formation in etiolated seedlings and unlike  
463 norflurazon, affects the phenotype of *pifq* mutant seedlings grown in the dark. GUN1-facilitated  
464 retrograde-signaling antagonized *PIF*-regulated gene expression and attenuated de-etiolation phenotypes  
465 triggered by lincomycin (Martin et al., 2016). Furthermore, lincomycin also inhibited PLB formation in  
466 the *pifq* mutant, revealing that PIFs are not necessary for PLB formation (Martin et al., 2016). GUN1-  
467 dependent and independent signaling pathways were proposed to act upstream of HY5 to repress  
468 photomorphogenesis of cotyledons (Ruckle et al., 2007). Intriguingly, the *ccr2* generated *cis*-carotene  
469 derived cleavage product also regulated a distinct set of genes involved in a photomorphogenic-  
470 dependent pathway. The nature by which a *cis*-carotene derived cleavage product regulates PLB  
471 formation by post-transcriptionally enhancing POR is quite distinct to that of GUN regulation of  
472 *PhANGs*.

473

474 ***An apocarotenoid post-transcriptionally regulates PIF3 and HY5 protein levels***

475 Here we demonstrate that the *ccr2*-generated apocarotenoid acted in a retrograde manner to post-  
476 transcriptionally regulate POR protein levels of two key transcription factors, PIF3 and HY5, in *ccr2* and  
477 *ccr2 det1-154* backgrounds (Figure 7). Of particular interest is how the abundance all three proteins was  
478 reverted in *ccr2 det1-154* to expected levels for *det1* mutants by treatment with D15. (Figure 7). Previous  
479 research has shown that *hy5*, *pif3* and *pifq* dark grown seedlings all contain etioplasts with PLBs (Chang  
480 et al., 2008; Stephenson et al., 2009; Martin et al., 2016). Consequently, we deduce that the lack of a  
481 PLB in *ccr2* is neither a consequence of apocarotenoid regulation of PIF3 or HY5, nor a lack of POR.  
482 An alternative hypothesis proposed in our model (Figure 8B) depicts how the apocarotenoid signal and

483 DET1 may regulate an unknown factor required for PLB formation that is independent of POR  
484 abundance.

485

#### 486 ***An apocarotenoid signal regulates skotomorphogenesis and plastid biogenesis in parallel to DET1***

487 DET1 is required for *cis*-carotene biosynthesis in wild type tissues, as *det1* mutants accumulate  
488 phytoene, phytofluene and tri-*cis*- $\zeta$ -carotene (Supplemental Table 7). *cis*-carotenes will hyper-  
489 accumulate in etiolated cotyledons and younger leaf tissues exposed to an extended dark period when  
490 CRTISO activity becomes rate-limited, such as in the absence of SDG8, which is required for permissive  
491 expression of *CRTISO* in the shoot meristem (Cazzonelli et al., 2009b; Cazzonelli et al., 2009a;  
492 Cazzonelli et al., 2010)(Figure 2). *SDG8* transcript levels are developmentally regulated, increasing from  
493 low basal levels after germination and declining during the dark phase of the diurnal cycle (Kim et al.,  
494 2005). Therefore, the accumulation of *cis*-carotenes and the apocarotenoid signal that regulates plastid  
495 biogenesis can be finely tuned with epigenetic and chromatin modifying processes that control  
496 development.

497 Herein we revealed how *ccr2* and *det1* oppositely regulate the chlorophyll biosynthetic enzyme,  
498 POR, at post-transcriptional and transcriptional levels, respectively, to control PLB formation (Figure 8).  
499 There are relatively few mutants published to date that do not produce a PLB in dark grown tissues and  
500 all, except *ccr2*, are due to reduced levels of PORA and/or PChlide. Arabidopsis mutants like *det1-1* and  
501 *cop1* mutants have less photoactive PChlide-F655 and higher total PChlide levels due to a reduction in  
502 POR that block PLB formation. Like *det1-1*, *det1-154* exhibits all the same phenotypes and indeed D15  
503 treatment of *ccr2 det1-154* blocked PLB formation (Chory et al., 1989)(Supplementary Figure 3)(Table  
504 1). Although, etioplasts in *ccr2* dark grown cotyledons do not make a PLB, they have an abundance of  
505 POR protein and total PChlide levels are similar to wild type (Figure 6,7). Therefore, *ccr2* and *det1*  
506 control PLB formation via independent signalling pathways. The *cis*-carotene derived cleavage product  
507 acts independent of *det1* to post-transcriptionally up-regulate POR protein levels and enhance PChlide  
508 thereby enabling PLB formation and etioplasts to chloroplast differentiation following de-etiolation and  
509 the normal greening of cotyledons exposed to continuous light.

510 *DET1* encodes a nuclear protein acting downstream from the phytochrome photoreceptors to  
511 regulate light-driven seedling development and *PhANG* expression (Schroeder et al., 2002). DET1  
512 interacts with COP1 and the chromatin regulator DDB1, to limit the access of transcription factors to  
513 promoters and negatively regulate the expression of hundreds of genes via chromatin interactions

514 (Schroeder et al., 2002; Lau and Deng, 2012). Light stimulates photomorphogenesis and the rapid down-  
515 regulation of *DET1* leading to a lower PIF3:HY5 protein ratio and the up-regulation of *PhANG*  
516 expression. Genetic mutations in *cop1* and *det1* also lower the PIF3:HY5 ratio thereby activating *PhANG*  
517 expression (Benvenuto et al., 2002) (Osterlund et al., 2000). Consistent with these findings, *ccr2 det1-*  
518 *154* etiolated seedlings treated with D15 displayed elevated HY5 and almost negligible PIF3 protein  
519 levels, contrasting opposite to that of *ccr2*, revealing that the *cis*-carotene derived cleavage metabolite  
520 post-transcriptionally antagonises DET1 regulation of HY5 and PIF3 (Figure 8). This raised a question  
521 as to whether the *ccr2*-derived cleavage product could directly regulate DET1? This is unlikely for  
522 several reasons. First, *ccr2* and *ccr2 ziso-155* displayed closed cotyledons, an apical hook and normal  
523 hypocotyl length revealing that the *cis*-carotene derived cleavage metabolite does not activate  
524 photomorphogenesis (Table 1). Second, DET1 protein levels were relatively unchanged in WT, *ccr2* and  
525 *ccr2 det1-154*, regardless of D15 chemical inhibition. In conclusion, we deduce that the apocarotenoid  
526 signal acts in parallel with DET1 to regulate POR, PIF3 and HY5 protein accumulation and thus regulate  
527 etioplast development during skotomorphogenesis and chloroplast development under extended periods  
528 of darkness.

529

## 530 **METHODS**

### 531 ***Mutants used in this study***

532 All germplasms are in the *Arabidopsis thaliana* ecotype Columbia (Col-0) background except  
533 where otherwise indicated. Germplasm used in this study include; *ziso#11C* (*zic1-3*: Salk\_136385),  
534 *ziso#12D* (*zic1-6*; Salk\_057915C), *ziso#13A* (*zic1-4*; CS859876), *ccr2.1/crtiso* (Park et al., 2002),  
535 *ccr1.1/sdg8* (Cazzonelli et al., 2009b), *lut2-1* (Pogson et al., 1996), *ccd1-1* (SAIL\_390\_C01), *ccd4*  
536 (Salk\_097984c), *max3-9/ccd7* (Stirnberg et al., 2002), *max4-1/ccd8* (Sorefan et al., 2003), *aba1-3*  
537 (Koornneef et al., 1982), *det1-1* (CS6158), *ccr2 det1-154*, and *det1-154*.

538

### 539 ***Plant growth conditions and treatments***

540 For soil grown plants, seeds were sown on DEBCO seed raising mixture and stratified for 3 d at  
541 4 °C in the dark, prior to transferring to an environmentally controlled growth chamber set to 21 °C and  
542 illuminated by approximately 120  $\mu\text{mol.m}^{-2}.\text{sec}^{-1}$  of fluorescent lighting. Unless otherwise stated, plants  
543 were grown in a 16-h photoperiod. Photoperiod shift assays were performed by shifting 2-3 week old

544 plants grown under a 16-h photoperiod to an 8-h photoperiod for one week and newly emerged immature  
545 leaves were scored as displaying either a yellow leaf (YL) or green leaf (GL) phenotype, reflecting either  
546 impaired or normal plastid development respectively.

547 For media grown seedlings, Arabidopsis seeds were sterilized for 3 h under chlorine gas in a  
548 sealed container, followed by washing seeds once with 70% ethanol and three times with sterilized water.  
549 Seeds were sown onto Murashige and Skoog (MS) media (Caisson Labs; MSP01) containing 0.5%  
550 phytigel (Sigma) and half-strength of Gamborg's vitamin solution 1000X (Sigma Aldrich) followed by  
551 stratification for 2 d (4 °C in dark) to synchronise germination. Inhibition of carotenoid cleavage  
552 dioxygenase (CCD) enzyme activity was achieved by adding D15 (aryl-C3N hydroxamic acid) dissolved  
553 in ethanol to a final optimal concentration of 100 µM as previously described (Van Norman et al., 2014).  
554 Etiolation experiments involved growing seedlings in the dark at 21°C for 7 d and harvesting tissue under  
555 a dim green LED light. For de-etiolation and greening experiments, Arabidopsis seeds were stratified for  
556 2 d and germinated in the dark at 21°C for 4 d. Seedlings were then exposed to constant light (~80  
557 µmol.m<sup>-2</sup>.sec<sup>-1</sup>, metal-halide lamp) for 72 h at 21 °C. Cotyledon tissues were harvested at 24-h intervals  
558 for chlorophyll quantification.

559

### 560 ***Plasmid construction***

561 pEARLEY::ZISO-OE and pEARLEY::DET1-OE binary vectors were designed to overexpress  
562 ZISO and DET1 cDNA fragments, respectively. Both genes were regulated by the constitutive CaMV35S  
563 promoter. Full length cDNA coding regions were chemically synthesised (Thermo Fisher Scientific) and  
564 cloned into the intermediate vector pDONR221. Next, using gateway homologous recombination, the  
565 cDNA fragments were cloned into pEarleyGate100 vector as per Gateway® Technology manufacturer's  
566 instructions (Thermo Fisher Scientific). Vector construction was confirmed by restriction digestion and  
567 sanger sequencing.

568

### 569 ***Generation of transgenic plants***

570 The *ccr2 ziso-155* and *ccr2 det1-154* EMS generated mutant lines were transformed by dipping  
571 Arabidopsis flowers with Agrobacteria harbouring pEARLEY::ZISO-OE or pEARLEY::DET1-OE  
572 binary vectors to generate *ccr2 ziso-155::ZISO-OE* and *ccr2 det1<sup>154</sup>::DET1-OE* transgenic lines,

573 respectively. At least 10 independent transgenic lines were generated by spraying seedlings grown on  
574 soil with 50 mg/L of glufosinate-ammonium salt (Basta herbicide).

575

### 576 ***Chlorophyll pigment quantification***

577 Total chlorophyll was measured as described previously (Porra et al., 1989) with minor  
578 modifications. Briefly, 20 seedlings from each sample were frozen and ground to fine powder using a  
579 TissueLyser (Qiagen). Homogenised tissue was rigorously suspended in 300 µL of extraction buffer  
580 (80% acetone and 2.5mM NaH<sub>2</sub>PO<sub>4</sub>, pH 7.4), incubated at 4°C in dark for 15 min and centrifuged at  
581 20,000 g for 10 min. Two hundred and fifty microliters of supernatant was transferred to a NUNC 96-  
582 well plate (Thermo Fisher Scientific) and measurements of A647, A664 and A750 were obtained using  
583 an iMark Microplate Absorbance Reader (Thermo Fisher Scientific). Total chlorophyll in each extract  
584 was determined using the following equation modified from (Porra, 2002): (Chl a + Chl b) (µg) = (17.76  
585 × (A647-A750) + 7.34 × (A664-A750)) × 0.895 × 0.25.

586

### 587 ***Carotenoid pigment analysis***

588 Pigment extraction and HPLC-based separation was performed as previously described (Cuttriss  
589 et al., 2007; Dhimi et al., 2018). Reverse phase HPLC (Agilent 1200 Series) was performed using either  
590 the GraceSmart-C18 (4-µm, 4.6 × 250-mm column; Alltech) or Allsphere-C18 (OD2 Column 5-µm, 4.6  
591 x 250; Grace Davison) and/or YMC-C30 (250 x 4.6mm, S-5µm) columns. The C18 columns were used  
592 to quantify β-carotene, xanthophylls and generate *cis*-carotene chromatograms, while the C30 column  
593 improved *cis*-carotene separation and absolute quantification. Carotenoids and chlorophylls were  
594 identified based upon retention time relative to known standards and their light emission absorbance  
595 spectra at 440 nm (chlorophyll, β-carotene, xanthophylls, pro-neurosporene, tetra-*cis*-lycopene), 400 nm  
596 (ζ-carotenes), 340 nm (phytofluene) and 286 nm (phytoene). Quantification of xanthophyll pigments was  
597 performed as previously described (Pogson et al., 1996). Quantification of *cis*-carotenes was performed  
598 by using their molar extinction coefficient and molecular weight to derive peak area in terms of  
599 micrograms (µg) per gram fresh weight (gfw) as previously described (Britton, 1995).

600

601 ***Transmission Electron Microscopy (TEM)***

602 Cotyledons from 5-d-old etiolated seedlings were harvested in dim-green safe light and fixed  
603 overnight in primary fixation buffer (2.5% Glutaraldehyde and 4% paraformaldehyde in 0.1 M phosphate  
604 buffer pH 7.2) under vacuum, post-fixed in 1% osmium tetroxide for 1 h, followed by an ethanol series:  
605 50%, 70%, 80%, 90%, 95% and 3 × 100% for 10 min each. After dehydration, samples were incubated  
606 in epon araldite (resin): ethanol at 1 : 2, 1 : 1 and 2:1 for 30 min each, then 3 times in 100% resin for 2  
607 h. Samples were then transferred to fresh resin and hardened under nitrogen air at 60 °C for 2 d, followed  
608 by sectioning of samples using Leica EM UC7 ultramicrotome (Wetzlar). Sections were placed on copper  
609 grids, stained with 5% uranyl acetate, washed thoroughly with distilled water, dried, and imaged with  
610 H7100FA transmission electron microscope (Hitachi) at 100 kV. For each of the dark-grown seedling  
611 samples, prolamellar bodies were counted from 12 fields on 3 grids, and data analysed using two-way  
612 ANOVA with post-hoc Tukey HSD.

613

614 ***DNA-seq Library Construction, Sequencing and Bioinformatics Identification of SNPs***

615 Genomic DNA (gDNA) was extracted using the DNeasy Plant Mini Kit (Qiagen). One microgram  
616 of gDNA was sheared using the M220 Focused-Ultrasonicator (Covaris) and libraries were prepared  
617 using NEBNext® Ultra™ DNA Library Prep Kit (New England Biolabs) followed by size selection  
618 (~320 bp) using AMPure XP Beads (Beckman Coulter). Paired-end sequencing was performed using the  
619 Illumina HiSEQ1500. After sequencing, the raw reads were assessed for quality using the FastQC  
620 software (<http://www.bioinformatics.babraham.ac.uk/projects/fastqc/>), and subjected to trimming of  
621 illumina adapters and filtering of low quality reads with AdapterRemoval programme (Lindgreen, 2012).  
622 The reads were mapped to the *Arabidopsis thaliana* (TAIR9) genome with BWA mapper (Li and Durbin,  
623 2009). The resultant BWA alignment files were converted to sorted bam files using the samtools v0.1.18  
624 package (Li et al., 2009) and were used as input for the subsequent SNP calling analyses. The SNPs were  
625 called and analysed further on both the parent and mutant lines using NGM pipeline (Austin et al., 2011)  
626 and SHOREmap (Schneeberger et al., 2009). For the NGM pipeline, SNPs were called using samtools  
627 (v0.1.16) as instructed and processed into '.emap' files using a script provided on the NGM website. The  
628 .emap files were uploaded to the NGM web-portal to assess SNPs with associated discordant chastity  
629 values. To identify mutant specific SNPs, SNPs from parental lines were filtered out and EMS-induced  
630 homozygous SNPs were defined based on the discordant chastity metric. For SHOREmap, the SHORE

631 software (Ossowski et al., 2008) was used to align the reads (implementing BWA) and call the SNPs  
632 (Hartwig et al., 2012). SHOREmap backcross was then implemented to calculate mutant allele  
633 frequencies, filter out parent SNPs and define the EMS mutational changes. Where appropriate, custom  
634 scripts were used to identify mutant specific EMS SNPs, filter out parent SNPs and annotate the region  
635 of interest. The SNPs and InDels were localized based on the annotation of gene models provided by  
636 TAIR database (<http://www.arabidopsis.org/>). The polymorphisms in the gene region and other genome  
637 regions were annotated as genic and intergenic, respectively. The genic polymorphisms were classified  
638 as CDS (coding sequences), UTR (untranslated regions), introns and splice site junctions according to  
639 their localization. SNPs in the CDS were further separated into synonymous and non-synonymous amino  
640 substitution. The GO/PFAM annotation data were further used to functionally annotate each gene.

641

#### 642 ***RNA-seq Library Construction, Sequencing and Differential Gene Expression Analysis***

643 Total RNA was extracted from Arabidopsis leaf tissues grown under an 8-h photoperiod or  
644 cotyledons from etiolated seedlings grown in dark for 7 d by TRIzol (Thermo Fisher Scientific) followed  
645 by DNase treatment at 37 °C for 30 min. RNA was recovered using x1.8 Agencourt RNAClean XP  
646 magnetic beads (Beckman Coulter). RNA (1 µg) libraries were constructed using Illumina TruSeq  
647 Stranded mRNA Library Prep Kit (ROCHE) followed by bead size selection (~280 bp) using AMPure  
648 XP Beads and libraries sequenced using the Illumina HiSEQ2000. Fifteen million reads were obtained  
649 from sequencing each library and 21365 to 23840 mRNA transcripts were identified. Quality control was  
650 performed with FASTQC v.0.11.2. Adapters were removed using scythe v.0.991 (flags -p 0.01 for the  
651 prior), reads trimmed with sickle v.1.33 (flags q 20; quality threshold and -l 20 for minimum read length  
652 after trimming) and aligned to the Arabidopsis genome (TAIR10) using the subjunc v.1.4.6 aligner (-u  
653 and -H flags to report reads with a single, unambiguous mapping location) (Liao et al., 2014). The number  
654 of reads mapping per gene were summarised using feature Counts (v.1.4.6 with flags -s 2, -P and -c) to  
655 map reverse stranded and discard read pairs mapping to different chromosomes (Liao et al., 2014).  
656 Statistical testing for relative gene expression was performed in R using edgeR v.3.4.2 (Robinson and  
657 Smyth, 2007, 2008; Robinson et al., 2010; Robinson and Oshlack, 2010; McCarthy et al., 2012), Voom  
658 (Law et al., 2014) in the limma package 3.20.1 (Smyth, 2004, 2005). Transcripts were considered  
659 differentially expressed when a fold change > 2 and FDR adjusted  $p < 0.05$ . The bioinformatics analysis  
660 pipeline from fastq to summarised counts per gene is available at <https://github.com/pedrocrisp/NGS->

661 [pipelines](#). RNAseq data sets was deposited into a permanent public repository with open access  
662 (<https://www.ncbi.nlm.nih.gov/sra/PRJNA498324> ).

663

#### 664 ***Protein extraction and western blot analysis***

665 For protein extraction, fifty to one hundred milligrams of etiolated Arabidopsis cotyledons (7-d-  
666 old) were harvested under dim-green safe light and ground to fine powder. Total protein was extracted  
667 using a TCA-acetone protocol (Mechin et al., 2007) with minor modification and pellets were  
668 resuspended in 100  $\mu$ L – 200  $\mu$ L solubilization buffer. The concentration of total protein was measured  
669 using Bradford reagent (Bio-Rad) and adjusted to 2  $\mu$ g/ $\mu$ L. A serial dilution was used to determine  
670 western blot sensitivity for each antibody and determine the optimal concentration for quantification.  
671 Five micrograms of total protein run on a gel was transferred to a PVDF membrane (Bio-Rad) and  
672 incubated with anti-POR polyclonal antibody (Agrisera Antibodies AS05067, 1:2000), anti-PIF3  
673 polyclonal antibody (Agrisera Antibodies, 1:2000) or anti-HY5 antibody (Agrisera Antibodies AS05067,  
674 1:1000) for 2 h. To examine DET1 protein levels, 10  $\mu$ g of total protein was loaded to the gel and anti-  
675 DET1 polyclonal antibody (Agrisera Antibodies AS153082) was used at a 1:1000 dilution. Membranes  
676 were washed and incubated with HRP-conjugated Goat anti-Rabbit IgG (Agrisera Antibodies, 1:2500)  
677 for 90 min. Membranes were re-probed using anti-Actin polyclonal antibody (Agrisera Antibodies  
678 AS132640, 1:3000) and HRP-conjugated Goat anti-Rabbit IgG (Agrisera Antibodies, 1:2500) for  
679 internal protein normalisation.

680

#### 681 ***Protochlorophyllide Quantification***

682 Protochlorophyllides (Pchlides) were extracted and measured using published methods  
683 (Kolossoff and Rebeiz, 2003) with modifications. Around 100 mg of etiolated Arabidopsis seedlings (7-  
684 d-old) were harvested under dim-green safe light, frozen and ground to fine powder. Two milliliters of  
685 80% ice-cold acetone was added to each sample and the mixture was briefly homogenized. After  
686 centrifugation at 18,000 g for 10 min at 1  $^{\circ}$ C, supernatant was split to 2  $\times$  1 mL for Pchlides and protein  
687 extraction. Fully esterified tetrapyrroles were extracted from the acetone extracts with equal volume  
688 followed by 1/3 volume of hexane. Pchlides remained in the hexane-extracted acetone residue were used  
689 for fluorescence measurement with a TECAN M1000PRO plate reader (Tecan Group) and net  
690 fluorescence were determined as previously described (Rebeiz et al., 1975). Protein extraction was



691 performed using 80% acetone and 10% TCA; protein concentration was used to normalize the net  
692 fluorescence of Pchlides.

693

### 694 ***Real-Time PCR Analysis***

695 The total RNA was extracted using Spectrum™ Plant Total RNA kit as per manufacturer's protocol  
696 (Sigma-Aldrich). The qRT-PCR was performed with mixture of 2  $\mu$ L of primer mix (2  $\mu$ M from each F  
697 & R primer), 1  $\mu$ L 1/10 diluted cDNA template, 5  $\mu$ L LightCycler 480 SYBR Green I Master mix and  
698 distilled water up to a total volume of 10  $\mu$ L. Relative transcript abundance was quantified using  
699 LightCycler 480 as per instructions (Roche). For each sample, three technical replicates for each of three  
700 biological replicates were tested. The relative gene expression levels were calculated by using relative  
701 quantification (Target Eff Ct(Wt-target) / Reference Eff Ct(Wt-target)) and fit point analysis (Pfaffl,  
702 2001). Protein Phosphatase 2A (At1g13320) was used as housekeeper reference control for all  
703 experiments (Czechowski et al., 2005). All primer sequences are listed in Supplemental Table 8.  
704 Statistical analysis was performed using Two-Way ANOVA.

705

### 706 **FIGURE LEGENDS**

707 **Figure 1.** A shorter photoperiod alters plastid development and pigmentation in *ccr2*.

708 **(A)** Three-week-old wild type (WT) and *ccr2* plants growing under a 16-h light photoperiod.

709 **(B)** Three-week-old plants were shifted from a 16-h to 8-h photoperiod for one week and newly emerged  
710 or expanded leaves appeared yellow in *ccr2* (YL; yellow outline), while WT displayed green leaves (GL;  
711 green outline).

712 **(C)** Chlorophyll levels ( $\mu$ g/gfw) and pigment ratios in green (WT and *ccr2*) and yellow (*ccr2*) leaves  
713 formed one week after a photoperiod shift from 16 h to 8 h. Standard error is shown for TChl (n=5, single  
714 leaf from 5 plants). Star denotes significant differences (ANOVA;  $p < 0.05$ ).

715 **(D)** Absolute carotenoid levels ( $\mu$ g/gfw) in green (WT and *ccr2*) and yellow (*ccr2*) leaves formed one  
716 week after a photoperiod light shift from 16 h to 8 h. Values represent average and standard error bars  
717 are displayed (n=5, single leaf from 5 plants). Lettering denotes significance (ANOVA;  $p < 0.05$ ).  
718 Neoxanthin (neo), violaxanthin (viol), antheraxanthin (anth), lutein (lutein), zeaxanthin (zea),  $\beta$ -car ( $\beta$ -  
719 carotene), Total Chlorophyll (TChl), Chlorophyll a/b ratio (Chl a/b), Total carotenoids (TCar).

720 (E) Transmission electron micrograph images showing representative chloroplasts from WT and *ccr2*  
721 green leaf sectors as well as yellow leaf sectors of *ccr2*.

722

723 **Figure 2.** Altered plastid development in *ccr2* is linked with *cis*-carotene accumulation and not to a  
724 perturbation in ABA or SL.

725 (A) Mutants that perturb the levels of lutein, ABA, SL and accumulate *cis*-carotenes (*ccr2*, *ccr1* and *ziso*)  
726 were grown for two weeks under a 16-h photoperiod and then shifted to a shorter 8-h photoperiod for  
727 one week. Representative images showing newly emerged and expanding leaves from multiple  
728 experimental and biological repetitions (n > 20 plants per line) are displayed. Genetic alleles tested  
729 include Col-0 (WT), *ccr2.1* (carotenoid isomerase), *lut2.1* (epsilon lycopene cyclase), *abal-3* (Ler  
730 background) (zeaxanthin epoxidase), *max4/ccd8* (carotenoid cleavage dioxygenase 8), *ccr1.1/sdg8* (set  
731 domain group 8) and *ziso1-3* ( $\zeta$ -carotene isomerase).

732 (B) Carotenoid profiles in rosette leaves from three-week-old plants grown under a 16-h photoperiod and  
733 subjected to 6-d of extended darkness.

734 (C) Carotenoid profiles in three-week-old rosette leaves from plants grown under a constant 8-h light  
735 photoperiod. Pigments were profiled in a yellow leaf (YL) and green leaf (GL) from WT and *ccr2*.

736 (D) Carotenoid profiles in newly emerged floral bud and rosette leaf tissues harvested from four-week-  
737 old plants growing under a 16-h photoperiod. Carotenoid profile traces of various tissue extracts from  
738 wild type (WT) and *ccr2* show pigments at wavelengths close to the absorption maxima of A<sub>440nm</sub>  
739 (Neoxanthin; N, violaxanthin; V, antheraxanthin; A, lutein; L, zeaxanthin; Z,  $\beta$ -carotene isomers;  $\beta$ -C,  
740 chlorophyll a; Chl a, chlorophyll b; chl b, tetra-*cis*-lycopene; plyc, neurosporene isomers; neuro, and  $\zeta$ -  
741 carotene;  $\zeta$ -C), A<sub>348nm</sub> (phytofluene; pflu) and A<sub>286nm</sub> (phytoene; phyt). HPLC profile y-axis units are in  
742 milli-absorbance units (mAU). HPLC traces are representative of multiple leaves from multiple  
743 experimental repetitions and retention times vary due to using different columns.

744

745 **Figure 3.** A forward genetics screen identified revertant lines of *ccr2* having reduced lutein and normal  
746 chlorophyll accumulation when grown under a shorter photoperiod.

747 (A) Representative images of *rccr2*<sup>155</sup> and *rccr2*<sup>154</sup> rosettes one week after shifting two-week old plants  
748 from a 16-h to 8-h photoperiod.

749 (B) Percentage lutein relative to total carotenoids in immature leaves from WT, *ccr2* and *rccr2* lines.

750 **(C)** The degree of leaf variegation detected in rosettes following a reduction in photoperiod. Leaf  
751 variegation (% of yellow relative to RGB) in WT, *ccr2*, *rccr2<sup>154</sup>* and *rccr2<sup>155</sup>* rosettes was quantified  
752 using the Lemnatec Scanalyser system and software.

753 **(D)** Total chlorophyll content in rosette leaves from WT, *ccr2*, *rccr2<sup>154</sup>* and *rccr2<sup>155</sup>* plants exposed to a  
754 shorter photoperiod.

755 **(E)** Segregation ratios of *rccr2<sup>154</sup>* and *rccr2<sup>155</sup>* after backcrossing to the *ccr2* parent in both Columbia  
756 (Col-0) and Landsberg erecta (Ler) ecotypes. (NGS; next generation sequencing)

757 **(F)** and **(G)** NGS of pooled leaf gDNA from a segregating population of *rccr2<sup>155</sup>* **(F)** and *rccr2<sup>154</sup>* **(G)**  
758 plants revealed less recombination surrounding SNPs at 3606630 bp and 6347991 bp, respectively. Error  
759 bars denote standard error of means (SEM) and stars represent statistical significance (ANOVA;  $p <$   
760 0.05).

761

762 **Figure 4.** *ziso* alters *cis*-carotene profile to restore PLB formation, plastid development and cotyledon  
763 greening in *ccr2*.

764 **(A)** Schematic structure of the wild type *ZISO* gDNA, *ZISO* protein and the truncated version of the  
765 *ZISO-155* genomic sequence. *ccr2 ziso-155* contains a G->A mutation in AT1G10830 (3606630 bp) as  
766 confirmed by Sanger sequencing that results in a premature stop codon (TGA) in exon 3.

767 **(B)** Rosette images of WT, *ccr2*, *ccr2 ziso-155*, and *ccr2 ziso-155::ZISO-OE#5* showing leaf  
768 pigmentations in newly emerged leaves following a reduction in photoperiod. Images are representative  
769 of 84/89 T<sub>4</sub> generation *ccr2 ziso-155* plants and six independent lines of *ccr2 ziso-155::ZISO-OE*.

770 **(C)** Carotenoid profiles of dark grown cotyledons from WT, *ccr2*, *ziso1-4*, and *ccr2 ziso1-4*. Wavelengths  
771 close to the absorption maxima of A<sub>440nm</sub> (major carotenoids and ζ-carotene isomers), A<sub>348nm</sub>  
772 (phytofluene) and A<sub>286nm</sub> (phytoene) are shown. Neoxanthin (N); violaxanthin (V); lutein (L); β-carotene  
773 (β-C); neurosporene (1 and 2); tetra-*cis*-lycopene (3); pro-neurosporene (4); ζ-carotene (5); phytofluene  
774 (6); phytoene (7).

775 **(D)** Transmission electron micrographs of a representative etioplast from 5-d-old dark grown cotyledons.  
776 The etioplasts of WT, *ziso* and *ccr2 ziso-155* show well-developed PLBs, while *ccr2* does not have any.  
777 Images are representative of 15 plastids from at least 5 TEM sections.

778 **(E)** Total chlorophyll levels in cotyledons following de-etiolation. WT, *ccr2*, *ziso1-4*, *ccr2 ziso-155*, and  
779 *ccr2 ziso1-4* were grown in darkness for 4-d, exposed to continuous white light and chlorophyll measured

780 at 0, 24, 48 and 72-h. Letters within a time point denote statistical analysis by ANOVA with a post-hoc  
781 Tukey test ( $n > 20$  seedlings). Error bars denote standard error of means (SEM).

782

783 **Figure 5.** *det1* restores PLB formation, plastid development and cotyledon greening in *ccr2*.

784 **(A)** Schematic structure of the wild type *DET1* gDNA, DET1 protein, SNP confirmation and alternative  
785 spliced *DET1-154* protein. A G->A mutation at the end of exon 4 (1449 bp) of AT4G10180 (6347991  
786 bp) was confirmed by Sanger sequencing that leads to the skipping of exon 4 (69 bp). The *DET1-154*  
787 splice variant produces a shorter protein (521 aa). Exon 4 comprises 23 amino acids in-frame, having  
788 homology to the six-hairpin glycosidase-like (IPR008928) domain.

789 **(B)** Rosette images of WT, *ccr2*, *ccr2 det1-154*, and *ccr2 det1-154::DET1-OE* showing leaf  
790 pigmentations in newly emerged leaves following a 16 h to 8 h photoperiod shift assay. Images are  
791 representative of 122/149 T<sub>1</sub> generation *ccr2 det1-154* plants from 12 independent lines surviving Basta  
792 herbicide selection after being transformed with pEARLEY::*DET1-OE*.

793 **(C)** Carotenoid profiles of 7-d-old dark grown cotyledons from WT, *ccr2*, *ccr2 det1-154* and *det1-1*  
794 etiolated seedlings. Wavelengths close to the absorption maxima of A440 (major carotenoids and  $\zeta$ -  
795 carotene isomers) show neoxanthin (N); violaxanthin (V); lutein (L),  $\beta$ -carotene ( $\beta$ -C) in WT and  
796 neurosporene isomers (1 and 2) tetra-*cis*-lycopene (3); pro-neurosporene (4), and pro- $\zeta$ -carotene (5) in  
797 *ccr2* and to a less extent in *ccr2 det1-154*.

798 **(D)** Etiolated seedling morphology of WT, *ccr2*, *ccr2 det1-154* and *det1-154*. Seedlings were grown in  
799 the dark for 7 d on MS media without sucrose. Representative images (>100 seedlings from independent  
800 experiments) depict a typical apical hook for WT and *ccr2*, and shorter hypocotyl with open cotyledons  
801 for *ccr2 det1-154* and *det1-154*.

802 **(E)** Chlorophyll levels in cotyledons following de-etiolation. *ccr2*, *ccr2 det1-154* and WT were etiolated  
803 for 4 d in darkness and thereafter exposed to continuous white light. Chlorophyll measurements were  
804 taken at 0, 24, 48 and 72 h after de-etiolation. Letters within a time point denote statistical analysis by  
805 one-way ANOVA with a post-hoc Tukey test ( $n > 20$  seedlings). Error bars denote standard error of  
806 means.

807

808 **Figure 6.** The carotenoid cleavage dioxygenase (CCD) inhibitor, D15, restores PLB formation in  
809 etiolated *ccr2* seedlings, cotyledon greening following de-etiolation and alters *cis*-carotene accumulation.

810 (A) Transmission electron micrographs of a representative etioplast from 5-d-old dark grown cotyledons  
811 reveal a well-developed PLB in *ccr2* treated with the D15, but not in *ccr2* treated with ethanol only  
812 (control; ctrl).

813 (B) Pchlide levels in Wild Type (WT) and *ccr2* treated +/- D15. Fluorescence was measured at 638 nm  
814 and 675 nm with an excitation at 440 nm. Net fluorescence of Pchlide was calculated and normalised to  
815 protein content.

816 (C) D15 restores chlorophyll accumulation in *ccr2* de-etiolated seedlings exposed to continuous light.  
817 Twenty seedlings from each of three biological replicates were harvested for chlorophyll determination  
818 in every 24 h under continuous light. Statistical analysis was by ANOVA with a post-hoc Tukey test (n  
819 = 20 seedlings).

820 (D) *cis*-carotene quantification in etiolated cotyledons of *ccr2* treated with D15. phytoene (phyt),  
821 phytofluene (pflu), tri-*cis*- $\zeta$ -carotene (3 $\zeta$ -C), di-*cis*- $\zeta$ -carotene (2 $\zeta$ -C), pro-neurosporene (p-N), tetra-*cis*-  
822 lycopene (p-lyc) and total *cis*-carotenes were quantified at absorption wavelengths providing maximum  
823 detection. Star denotes significance (ANOVA,  $p < 0.05$ ). Error bars show standard error (n =4).

824 (E) Quantification of carotenoid levels in etiolated tissues of WT treated with D15. Neoxanthin (N);  
825 violaxanthin (V); antheraxanthin (A), lutein (L),  $\beta$ -carotene ( $\beta$ -C) and total carotenoids (T) were  
826 quantified at a 440nm absorption wavelength providing maximum detection. Star denotes significance  
827 (ANOVA,  $p < 0.05$ ). Data is representative of two independent experiments.

828

829 **Figure 7.** Chemical inhibition of CCD activity identifies a *ccr2* generated cleavage product acts in  
830 parallel *det1-154* to post-transcriptionally regulate POR, HY5 and PIF3 protein levels.

831 (A) Transcript levels of *PORA*, *PORB*, *PIF3* and *HY5* in WT and *ccr2 det1-154* etiolated seedlings  
832 growing on MS media +/- D15. Statistical analysis was performed using two-way ANOVA followed by  
833 a post-hoc paired *t*-test ( $p < 0.05$ ). Error bars represent standard error of means.

834 (B) Representative image of a western blot showing POR protein levels. Proteins were extracted from  
835 WT, *ccr2* and *ccr2 det1-154* etiolated seedlings grown on MS media +/- D15 (control; Ctrl). The  
836 membrane was re-probed using anti-Actin antibody as an internal control to normalise POR protein levels  
837 among different samples.

838 (C) Representative image of a western blot showing DET1 protein levels. Proteins were extracted from  
839 WT, *ccr2* and *ccr2 det1-154* etiolated seedlings grown on MS media +/- D15 (control; Ctrl). The

840 membrane was re-probed using anti-Actin antibody as an internal control to normalise POR protein levels  
841 among different samples.

842 **(D)** Western blot image of HY5 and PIF3 protein levels. Proteins were extracted from WT, *ccr2* and  
843 *ccr2 det1-154* etiolated seedlings grown on MS media (Ctrl) or media containing D15. The membrane  
844 was re-probed using anti-Actin antibody as an internal control to normalise HY5/PIF3 protein levels  
845 among different samples.

846

847 **Figure 8. A model describing how a *cis*-carotene derived cleavage product controls POR and PLB**  
848 **formation during plastid development.**

849 **(A)** *ccr2* can accumulate poly-*cis*-carotenes that undergo enzymatic cleavage via CCDs to generate an  
850 apocarotenoid signal (ACS). Norflurazon (NF) treatment of *ccr2* etiolated seedlings or the loss-of-  
851 function in *ziso-155* block the accumulation of downstream *cis*-carotenes required for the biosynthesis  
852 of ACS. Chemical treatment of etiolated seedlings with D15 inhibits CCD cleavage of pro-neurosporene  
853 and/or tetra-*cis*-lycopene isomers into ACS.

854 **(B)** During skotomorphogenesis, ACS promotes “Factor X”. Factor X negatively affects PLB formation.  
855 Factor X could act to stabilise proteins by disrupting ubiquitination, de-ubiquitination, protease mediated  
856 protein degradation, heterodimerization of transcription factors, coactivator concentrations, and/or  
857 interact with ligand binding sites of receptors. DET1 is a repressor of photomorphogenesis that post-  
858 transcriptionally regulate PIF3 and HY5 protein levels, which control *PhANG* expression. *det1* mutants  
859 lack POR and cannot make a PLB. ACS post-transcriptionally enhances POR protein levels, while *det1*  
860 blocks Factor X, thereby allowing PLB formation in *ccr2 det1-154*. *det1* reduces *cis*-carotene  
861 accumulation, and downregulates pro-neurosporene and tetra-*cis*-lycopene to maintain a threshold level  
862 of ACS.

863 **(C)** During photomorphogenesis, extended dark and/or shorter photoperiods, ACS manifests in newly  
864 emerged leaves from the *ccr2* shoot meristem and perturbed chloroplast development and chlorophyll  
865 accumulation causing a leaf variegation phenotype. Green arrows and red lines represent positive and  
866 negative regulation, respectively. Abbreviations: PSY, phytoene synthase; PDS, phytoene desaturase,  
867 ZDS, ζ-carotene desaturase; ZISO, ζ-carotene isomerase; CRTISO, carotenoid isomerase; *det1-154*,  
868 DEETIOLATED1-154; D15, inhibitor of CCD activity; CCD, carotenoid cleavage dioxygenase; *ccr2*,  
869 *CRTISO* mutant.

870

871 **Table 1.** A *cis*-carotene derived ACS acts in parallel to DET1 to control PLB formation

872

873 **SUPPORTING INFORMATION**

874 **Supplemental Figure 1.** A model for *cis*-carotene biosynthesis and regulation of PLB formation during  
875 skotomorphogenesis.

876 A) A pathway for *cis*-carotene biosynthesis. The carotenoid isomerase  
877 mutant (*ccr2*) accumulates *cis*-carotenes in etiolated seedlings. Norflurazon (NF) inhibits *cis*-carotene  
878 accumulation.

879 B) Control of prolamellar body (PLB) formation and protein levels during skotomorphogenesis. DET1  
880 acts as a repressor of photomorphogenesis in etiolated tissues to maintain high protein levels of PIF3,  
881 which reduce *PhANG* expression. Upon de-etiolation, DET1 and PIF3 protein levels decline and *det1*  
882 mutants accumulate HY5 protein, which promotes the expression of *PhANGs*. *det1* mutants do not  
883 accumulate PORA proteins and do not form a PLB in etioplasts. Grey insert boxes digitally represent  
884 published western protein blots for PORA (Lebedev et al., 1995), PIF3 (Dong et al., 2014) and HY5  
885 (Osterlund et al., 2000) in WT and *det1* mutant genotypes. Solid black and grey fills represents high and  
886 low protein expression, respectively. Green arrows and red lines represent positive and negative  
887 regulation, respectively. Abbreviations: PSY, phytoene synthase; PDS, phytoene desaturase, ZDS,  $\zeta$ -  
888 carotene desaturase; ZISO,  $\zeta$ -carotene isomerase; CRTISO, carotenoid isomerase

889

890

891 **Supplemental Figure 2.** A shorter photoperiod promotes leaf variegation affecting chlorophyll levels  
892 and carotenoid composition in *ccr2*.

893 (A) WT and *ccr2* plants were grown under a lower intensity of light ( $50 \mu\text{mol m}^{-2} \text{s}^{-1}$ ) and representative  
894 images taken 14 DAG.

895 (B) and (C) WT and *ccr2* plants were grown under a very short 8 h photoperiod and representative images  
896 taken after 14 (B) and 21 (C) days of growth.

897 (D) Chlorophyll content in immature leaves that recently emerged from WT and *ccr2* rosettes 14 DAG.

898 Values represent the average and standard deviations of total chlorophyll content ( $\mu\text{g/gfw}$ ) from a single  
899 leaf sector (n=2-7 plants). Lettering denotes significance (ANOVA,  $p < 0.05$ ).

900 **(E)** Percentage carotenoid composition (relative to total) in green (WT and *ccr2*) and yellow (*ccr2*)  
901 virescent leaves developed one week after a 16 h to 8 h photoperiod shift. Values represent average and  
902 standard error of means are displayed (n=5, single leaf from 5 plants). Lettering denotes significance  
903 (paired *t*-test;  $p < 0.05$ ). Neoxanthin (neo), violaxanthin (viol), antheraxanthin (anth), lutein (lutein),  
904 zeaxanthin (zea),  $\beta$ -car ( $\beta$ -carotene), Green Leaf (GL), Yellow Leaf (YL).

905

906 **Supplemental Figure 3.** *det1-154* has alternative splicing and reduced pigments, *cis*-carotenes and  
907 restored PLB formation in *ccr2*.

908 **(A)** qRT-PCR confirms alternative splicing of exon 4 in *ccr2 det1-154* leaf tissues. Primers were  
909 designed to quantify the full length (+ Exon 4; spanning exons 3-4 and 4-5 junctions) and the spliced (-  
910 Exon 4: spanning exon 3-5 and 6-7 junctions) *DET1-154* mRNA transcript levels in WT and *ccr2 det1-*  
911 *154* leaf tissues, respectively. Standard error bars are shown (n=4).

912 **(B)** *ccr2 det1-154* displays phenotypes resembling *det1-1*, including a small rosette, shorter floral  
913 architecture and partially sterility in comparison to WT and *ccr2*.

914 **(C)** *ccr2 det1-154* shows reduced pigment levels compared to *ccr2*. Neoxanthin (N); violaxanthin (V);  
915 antheraxanthin (A), lutein (L),  $\beta$ -carotene ( $\beta$ -C), total carotenoids (T) and total chlorophylls (Chl) were  
916 quantified at a 440nm. Mean values are displayed and error bars denote standard error (n=3). Star denotes  
917 significance (ANOVA,  $p < 0.05$ ). Data is representative of multiple experiments.

918 **(D)** *det1-154* reduces *cis*-carotene content in *ccr2*. phytoene (phyt), phytofluene (pflu), tri-*cis*- $\zeta$ -carotene  
919 (3 $\zeta$ -C), di-*cis*- $\zeta$ -carotene (2 $\zeta$ -C), pro-neurosporene (p-N), tetra-*cis*-lycopene (p-lyc) and total *cis*-  
920 carotenes were quantified at absorption wavelengths providing maximum detection. Star denotes  
921 significance (ANOVA,  $p < 0.05$ ). Data is representative of two independent experiments and error bars  
922 show standard error (n=4).

923 **(D)** Transmission electron micrographs of a representative etioplast from 5-d-old dark grown cotyledons  
924 showing a well-developed PLB in *ccr2 det1-154*.

925

926 **Supplemental Figure 4.** The loss-of-function in individual members of the *carotenoid cleavage*  
927 *dioxygenase* gene family cannot restore plastid development in *ccr2* rosettes.

928 Three-week-old WT, *ccr2*, *ccr2 ccd1*, *ccr2 ccd4*, *ccr2 ccd7*, and *ccr2 ccd8* (F<sub>3</sub> homozygous double  
929 mutant lines) plants were shifted from a 16-h to 8-h photoperiod until newly formed leaves in the *ccr2*  
930 rosette displayed a virescent leaf phenotype.



931 (A) Representative images of plants showing newly developed leaves in the rosette.

932 (B) Quantification of leaf variegation in individual rosettes from *ccr2 ccd* double mutants. Data is  
933 representative of multiple independent experiments. Statistical analysis by ANOVA with post-hoc Tukey  
934 test showed no significant difference in the number of *ccr2* and *ccr2 ccd* plants displaying a virescent  
935 phenotype.

936

937 **Supplemental Table 1.** Immature *ccr2* tissues have an altered *cis*-carotene and xanthophyll composition.

938 **Supplemental Table 2.** D15 and *ziso* restore PLB formation in *ccr2* etiolated cotyledons.

939 **Supplemental Table 3.** Transcriptomic analysis of WT, *ccr2* and *ccr2 ziso-155* etiolated tissues.

940 **Supplemental Table 4.** Transcriptome analysis of WT, *ccr2* and *ccr2 ziso-155* immature leaf tissues

941 **Supplemental Table 5.** Significantly expressed genes regulated in *ccr2* and contra-regulated *ccr2 ziso-*  
942 *155* that are common to both etiolated and immature leaf tissues.

943 **Supplemental Table 6.** Contra-regulated differential gene expression in etiolated seedlings and young  
944 leaves of *ccr2 ziso-155*.

945 **Supplemental Table 7.** *det1* reduced carotenoids and caused *cis*-carotenes to accumulate in leaves and  
946 etiolated tissues.

947 **Supplemental Table 8.** Primer sequences used for qRT-PCR and *ccr2 det154* characterisation

948

#### 949 **ACKNOWLEDGEMENTS**

950 We would like to especially thank Rishi Aryal for his technical assistance in confirming the splicing of  
951 *det1-154* and Peter Crisp for assisting XH with the bioinformatics analysis. Many thanks to Arun Yadav,  
952 Shelly Verma, William Walker, Michelle Nairn, Sam Perotti, Jacinta Watkins and Kai Chan for their  
953 assistance in maintaining plants, crossing mutant germplasm and performing HPLC. We thank Chris  
954 Mitchell for developing *cis*-carotene standards. We thank Philip Benfey for providing the D15 chemical  
955 inhibitor of CCD activity. Next generation sequencing was performed at the Biomolecular Resource  
956 Facility (ANU). This work was supported by Grant CE140100008 (BJP) and DP130102593 (CIC).

957

#### 958 **AUTHOR CONTRIBUTIONS:**

959 CIC and BJP conceived ideas and designed research. CIC and XH wrote the manuscript. CIC and XH  
960 prepared figures and tables and performed the majority of experiments. YA contributed to Figures 5, 6,

961 7, 8. YA and ND contributed to Tables 1, S7 and Figure S3. JR produced Figure S3. MS contributed  
962 expertise in DNA bioinformatics analysis. JL contributed expertise in TEM. CIC and BJP supervised  
963 XH, JR and ND. CIC supervised YA. All authors contributed to editing the manuscript.  
964

965 **REFERENCES**

966

- 967 **Al-Babili, S., and Bouwmeester, H.J.** (2015). Strigolactones, a novel carotenoid-derived plant  
968 hormone. *Annu Rev Plant Biol* **66**, 161-186.
- 969 **Alagoz, Y., Nayak, P., Dhami, N., and Cazzonelli, C.I.** (2018). cis-carotene biosynthesis, evolution  
970 and regulation in plants: The emergence of novel signaling metabolites. *Arch Biochem Biophys*  
971 **654**, 172-184.
- 972 **Alvarez, D., Voss, B., Maass, D., Wust, F., Schaub, P., Beyer, P., and Welsch, R.** (2016).  
973 Carotenogenesis Is Regulated by 5'UTR-Mediated Translation of Phytoene Synthase Splice  
974 Variants. *Plant Physiol* **172**, 2314-2326.
- 975 **Armstrong, G.A., Runge, S., Frick, G., Sperling, U., and Apel, K.** (1995). Identification of  
976 NADPH:protochlorophyllide oxidoreductases A and B: a branched pathway for light-dependent  
977 chlorophyll biosynthesis in *Arabidopsis thaliana*. *Plant Physiol* **108**, 1505-1517.
- 978 **Arsovski, A.A., Galstyan, A., Guseman, J.M., and Nemhauser, J.L.** (2012). Photomorphogenesis.  
979 *The Arabidopsis book / American Society of Plant Biologists* **10**, e0147.
- 980 **Auldridge, M.E., McCarty, D.R., and Klee, H.J.** (2006). Plant carotenoid cleavage oxygenases and  
981 their apocarotenoid products. *Curr Opin Plant Biol* **9**, 315-321.
- 982 **Austin, R.S., Vidaurre, D., Stamatiou, G., Breit, R., Provart, N.J., Bonetta, D., Zhang, J., Fung,  
983 P., Gong, Y., Wang, P.W., McCourt, P., and Guttman, D.S.** (2011). Next-generation  
984 mapping of *Arabidopsis* genes. *The Plant journal : for cell and molecular biology* **67**, 715-725.
- 985 **Avendano-Vazquez, A.O., Cordoba, E., Llamas, E., San Roman, C., Nisar, N., De la Torre, S.,  
986 Ramos-Vega, M., Gutierrez-Nava, M.D., Cazzonelli, C.I., Pogson, B.J., and Leon, P.**  
987 (2014). An Uncharacterized Apocarotenoid-Derived Signal Generated in zeta-Carotene  
988 Desaturase Mutants Regulates Leaf Development and the Expression of Chloroplast and  
989 Nuclear Genes in *Arabidopsis*. *Plant Cell* **26**, 2524-2537.
- 990 **Baranski, R., and Cazzonelli, C.** (2016). Carotenoid biosynthesis and regulation in plants. In  
991 *Carotenoids: Nutrition, Analysis and Technology*, A. Kaczor and M. Baranska, eds (Wiley-  
992 Blackwell), pp. 161-189.
- 993 **Bartley, G.E., Scolnik, P.A., and Beyer, P.** (1999). Two *Arabidopsis thaliana* carotene desaturases,  
994 phytoene desaturase and zeta-carotene desaturase, expressed in *Escherichia coli*, catalyze a  
995 poly-cis pathway to yield pro-lycopene. *European Journal of Biochemistry* **259**, 396-403.
- 996 **Benvenuto, G., Formigini, F., Laflamme, P., Malakhov, M., and Bowler, C.** (2002). The  
997 photomorphogenesis regulator DET1 binds the amino-terminal tail of histone H2B in a  
998 nucleosome context. *Curr Biol* **12**, 1529-1534.
- 999 **Britton, G.** (1995). *UV/visible spectroscopy*. (Basel, Switzerland: Birkhauser).
- 1000 **Bruno, M., Koschmieder, J., Wuest, F., Schaub, P., Fehling-Kaschek, M., Timmer, J., Beyer, P.,  
1001 and Al-Babili, S.** (2016). Enzymatic study on AtCCD4 and AtCCD7 and their potential to form  
1002 acyclic regulatory metabolites. *J Exp Bot* **67**, 5993-6005.
- 1003 **Cazzonelli, C.I.** (2011). Carotenoids in nature: insights from plants and beyond. *Funct. Plant Biol.* **38**,  
1004 833-847.
- 1005 **Cazzonelli, C.I., and Pogson, B.J.** (2010). Source to sink: regulation of carotenoid biosynthesis in  
1006 plants. *Trends Plant Sci* **15**, 266-274.
- 1007 **Cazzonelli, C.I., Yin, K., and Pogson, B.J.** (2009a). Potential implications for epigenetic regulation of  
1008 carotenoid biosynthesis during root and shoot development. *Plant Signal Behavior* **4**, 339-341.

- 1009 **Cazzonelli, C.I., Roberts, A.C., Carmody, M.E., and Pogson, B.J.** (2010). Transcriptional Control  
1010 of SET DOMAIN GROUP8 and CAROTENOID ISOMERASE during Arabidopsis  
1011 Development. *Mol. Plant* **3**, 174-191.
- 1012 **Cazzonelli, C.I., Cuttriss, A.J., Cossetto, S.B., Pye, W., Crisp, P., Whelan, J., Finnegan, E.J.,**  
1013 **Turnbull, C., and Pogson, B.J.** (2009b). Regulation of carotenoid composition and shoot  
1014 branching in *Arabidopsis* by a chromatin modifying histone methyltransferase, SDG8. *Plant*  
1015 *Cell* **21**, 39-53.
- 1016 **Chai, C., Fang, J., Liu, Y., Tong, H., Gong, Y., Wang, Y., Liu, M., Wang, Y., Qian, Q., Cheng, Z.,**  
1017 **and Chu, C.** (2010). ZEBRA2, encoding a carotenoid isomerase, is involved in photoprotection  
1018 in rice. *Plant molecular biology* **75**, 211-221.
- 1019 **Chan, K.X., Phua, S.Y., Crisp, P., McQuinn, R., and Pogson, B.J.** (2016). Learning the Languages  
1020 of the Chloroplast: Retrograde Signaling and Beyond. *Annu Rev Plant Biol* **67**, 25-53.
- 1021 **Chang, C.S., Li, Y.H., Chen, L.T., Chen, W.C., Hsieh, W.P., Shin, J., Jane, W.N., Chou, S.J.,**  
1022 **Choi, G., Hu, J.M., Somerville, S., and Wu, S.H.** (2008). LZFL1, a HY5-regulated  
1023 transcriptional factor, functions in Arabidopsis de-etiolation. *Plant J* **54**, 205-219.
- 1024 **Chen, Y., Li, F., and Wurtzel, E.T.** (2010). Isolation and characterization of the *Z-ISO* gene encoding  
1025 a missing component of carotenoid biosynthesis in plants. *Plant Physiology* **153**, 66-79.
- 1026 **Chory, J., Peto, C., Feinbaum, R., Pratt, L., and Ausubel, F.** (1989). Arabidopsis thaliana mutant  
1027 that develops as a light-grown plant in the absence of light. *Cell* **58**, 991-999.
- 1028 **Cunningham, F.X., Jr., Chamovitz, D., Misawa, N., Gantt, E., and Hirschberg, J.** (1993). Cloning  
1029 and functional expression in Escherichia coli of a cyanobacterial gene for lycopene cyclase, the  
1030 enzyme that catalyzes the biosynthesis of beta-carotene. *FEBS Lett* **328**, 130-138.
- 1031 **Cunningham, F.X., Jr., Pogson, B., Sun, Z., McDonald, K.A., DellaPenna, D., and Gantt, E.**  
1032 (1996). Functional analysis of the beta and epsilon lycopene cyclase enzymes of Arabidopsis  
1033 reveals a mechanism for control of cyclic carotenoid formation. *Plant Cell* **8**, 1613-1626.
- 1034 **Cuttriss, A.J., Chubb, A., Alawady, A., Grimm, B., and Pogson, B.** (2007). Regulation of lutein  
1035 biosynthesis and prolamellar body formation in Arabidopsis. *Functional Plant Biol* **34**, 663-672.
- 1036 **Czechowski, T., Stitt, M., Altmann, T., Udvardi, M.K., and Scheible, W.R.** (2005). Genome-wide  
1037 identification and testing of superior reference genes for transcript normalization in  
1038 Arabidopsis. *Plant Physiol* **139**, 5-17.
- 1039 **Datta, S., Hettiarachchi, G.H.C.M., Deng, X.W., and Holm, M.** (2006). Arabidopsis CONSTANS-  
1040 LIKE3 is a positive regulator of red light signaling and root growth. *Plant Cell* **18**, 70-84.
- 1041 **Denev, I.D., Yahubyan, G.T., Minkov, I.N., and Sundqvist, C.** (2005). Organization of  
1042 protochlorophyllide oxidoreductase in prolamellar bodies isolated from etiolated carotenoid-  
1043 deficient wheat leaves as revealed by fluorescence probes. *Biochim Biophys Acta* **1716**, 97-  
1044 103.
- 1045 **Dhami, N., Tissue, D.T., and Cazzonelli, C.I.** (2018). Leaf-age dependent response of carotenoid  
1046 accumulation to elevated CO<sub>2</sub> in Arabidopsis. *Arch Biochem Biophys* **647**, 67-75.
- 1047 **Dong, H., Deng, Y., Mu, J., Lu, Q., Wang, Y., Xu, Y., Chu, C., Chong, K., Lu, C., and Zuo, J.**  
1048 (2007). The Arabidopsis Spontaneous *Cell Death1* gene, encoding a zeta-carotene desaturase  
1049 essential for carotenoid biosynthesis, is involved in chloroplast development, photoprotection  
1050 and retrograde signalling. *Cell Res.* **17**, 458-470.
- 1051 **Dong, J., Tang, D., Gao, Z., Yu, R., Li, K., He, H., Terzaghi, W., Deng, X.W., and Chen, H.**  
1052 (2014). Arabidopsis DE-ETIOLATED1 represses photomorphogenesis by positively regulating  
1053 phytochrome-interacting factors in the dark. *Plant Cell* **26**, 3630-3645.

- 1054 **Fantini, E., Falcone, G., Frusciante, S., Giliberto, L., and Giuliano, G.** (2013). Dissection of tomato  
1055 lycopene biosynthesis through virus-induced gene silencing. *Plant Physiol* **163**, 986-998.
- 1056 **Finkelstein, R.** (2013). Abscisic Acid synthesis and response. *The Arabidopsis book / American*  
1057 *Society of Plant Biologists* **11**, e0166.
- 1058 **Galpaz, N., Burger, Y., Lavee, T., Tzuri, G., Sherman, A., Melamed, T., Eshed, R., Meir, A.,**  
1059 **Portnoy, V., Bar, E., Shimoni-Shor, E., Feder, A., Saar, Y., Saar, U., Baumkoler, F.,**  
1060 **Lewinsohn, E., Schaffer, A.A., Katzir, N., and Tadmor, Y.** (2013). Genetic and chemical  
1061 characterization of an EMS induced mutation in Cucumis melo CRTISO gene. *Arch Biochem*  
1062 *Biophys* **539**, 117-125.
- 1063 **Giuliano, G., Giliberto, L., and Rosati, C.** (2002). Carotenoid isomerase: a tale of light and isomers.  
1064 *Trends Plant Sci* **7**, 427-429.
- 1065 **Gonzalez-Jorge, S., Ha, S.H., Magallanes-Lundback, M., Gilliland, L.U., Zhou, A., Lipka, A.E.,**  
1066 **Nguyen, Y.N., Angelovici, R., Lin, H., Cepela, J., Little, H., Buell, C.R., Gore, M.A., and**  
1067 **Dellapenna, D.** (2013). Carotenoid cleavage dioxygenase4 is a negative regulator of beta-  
1068 carotene content in Arabidopsis seeds. *Plant Cell* **25**, 4812-4826.
- 1069 **Gonzalez-Perez, S., Gutierrez, J., Garcia-Garcia, F., Osuna, D., Dopazo, J., Lorenzo, O.,**  
1070 **Revuelta, J.L., and Arellano, J.B.** (2011). Early transcriptional defense responses in  
1071 Arabidopsis cell suspension culture under high-light conditions. *Plant Physiol* **156**, 1439-1456.
- 1072 **Han, S.H., Sakuraba, Y., Koh, H.J., and Paek, N.C.** (2012). Leaf variegation in the rice zebra2  
1073 mutant is caused by photoperiodic accumulation of tetra-cis-lycopene and singlet oxygen. *Mol*  
1074 *Cells* **33**, 87-97.
- 1075 **Harrison, P.J., and Bugg, T.D.H.** (2014). Enzymology of the carotenoid cleavage dioxygenases:  
1076 Reaction mechanisms, inhibition and biochemical roles. *Arch Biochem Biophys* **544**, 105-111.
- 1077 **Hartwig, B., James, G.V., Konrad, K., Schneeberger, K., and Turck, F.** (2012). Fast isogenic  
1078 mapping-by-sequencing of ethyl methanesulfonate-induced mutant bulks. *Plant Physiology* **160**,  
1079 591-600.
- 1080 **Havaux, M.** (2014). Carotenoid oxidation products as stress signals in plants. *Plant J* **79**, 597-606.
- 1081 **Hou, X., Rivers, J., Leon, P., McQuinn, R.P., and Pogson, B.J.** (2016). Synthesis and Function of  
1082 Apocarotenoid Signals in Plants. *Trends Plant Sci*.
- 1083 **Ilg, A., Bruno, M., Beyer, P., and Al-Babili, S.** (2014). Tomato carotenoid cleavage dioxygenases 1A  
1084 and 1B: Relaxed double bond specificity leads to a plenitude of dialdehydes, mono-  
1085 apocarotenoids and isoprenoid volatiles. *FEBS Open Bio* **4**, 584-593.
- 1086 **Isaacson, T., Ronen, G., Zamir, D., and Hirschberg, J.** (2002). Cloning of *tangerine* from tomato  
1087 reveals a carotenoid isomerase essential for the production of beta-carotene and xanthophylls in  
1088 plants. *The Plant cell* **14**, 333-342.
- 1089 **Janick-Buckner, D., O'Neal, J.M., Joyce, E.K., and Buckner, B.** (2001). Genetic and biochemical  
1090 analysis of the y9 gene of maize, a carotenoid biosynthetic gene. *Maydica* **46**, 41-46.
- 1091 **Kachanovsky, D.E., Filler, S., Isaacson, T., and Hirschberg, J.** (2012). Epistasis in tomato color  
1092 mutations involves regulation of phytoene synthase 1 expression by cis-carotenoids.  
1093 *Proceedings of the National Academy of Sciences of the United States of America* **109**, 19021-  
1094 19026.
- 1095 **Kato, Y., Miura, E., Ido, K., Ifuku, K., and Sakamoto, W.** (2009). The Variegated Mutants Lacking  
1096 Chloroplastic FtsHs Are Defective in D1 Degradation and Accumulate Reactive Oxygen  
1097 Species. *Plant Physiology* **151**, 1790-1801.

- 1098 **Kim, S.Y., He, Y., Jacob, Y., Noh, Y.S., Michaels, S., and Amasino, R.** (2005). Establishment of the  
1099 vernalization-responsive, winter-annual habit in *Arabidopsis* requires a putative histone H3  
1100 methyl transferase. *Plant Cell* **17**, 3301-3310.
- 1101 **Kolossov, V.L., and Rebeiz, C.A.** (2003). Chloroplast biogenesis 88 - Protochlorophyllide b occurs in  
1102 green but not in etiolated plants. *Journal of Biological Chemistry* **278**, 49675-49678.
- 1103 **Koornneef, M., Jorna, M.L., Brinkhorst-van der Swan, D.L., and Karssen, C.M.** (1982). The  
1104 isolation of abscisic acid (ABA) deficient mutants by selection of induced revertants in non-  
1105 germinating gibberellin sensitive lines of *Arabidopsis thaliana* (L.) heynh. *TAG. Theoretical*  
1106 *and applied genetics* **61**, 385-393.
- 1107 **Lau, O.S., and Deng, X.W.** (2012). The photomorphogenic repressors COP1 and DET1: 20 years  
1108 later. *Trends Plant Sci* **17**, 584-593.
- 1109 **Law, C.W., Chen, Y., Shi, W., and Smyth, G.K.** (2014). voom: Precision weights unlock linear  
1110 model analysis tools for RNA-seq read counts. *Genome biology* **15**, R29.
- 1111 **Leenhardt, F., Lyan, B., Rock, E., Boussard, A., Potus, J., Chanliaud, E., and Remesy, C.** (2006).  
1112 Wheat lipoxygenase activity induces greater loss of carotenoids than vitamin E during  
1113 breadmaking. *Journal of agricultural and food chemistry* **54**, 1710-1715.
- 1114 **Lepisto, A., and Rintamaki, E.** (2012). Coordination of Plastid and Light Signaling Pathways upon  
1115 Development of *Arabidopsis* Leaves under Various Photoperiods. *Molecular Plant* **5**, 799-816.
- 1116 **Li, F., Murillo, C., and Wurtzel, E.T.** (2007). Maize Y9 encodes a product essential for 15-cis-zeta-  
1117 carotene isomerization. *Plant Physiol.* **144**, 1181-1189.
- 1118 **Li, F., Vallabhaneni, R., Yu, J., Rocheford, T., and Wurtzel, E.T.** (2008). The maize phytoene  
1119 synthase gene family: overlapping roles for carotenogenesis in endosperm,  
1120 photomorphogenesis, and thermal stress tolerance. *Plant Physiology* **147**, 1334-1346.
- 1121 **Li, H., and Durbin, R.** (2009). Fast and accurate short read alignment with Burrows-Wheeler  
1122 transform. *Bioinformatics* **25**, 1754-1760.
- 1123 **Li, H., Handsaker, B., Wysoker, A., Fennell, T., Ruan, J., Homer, N., Marth, G., Abecasis, G.,  
1124 Durbin, R., and Genome Project Data Processing, S.** (2009). The Sequence Alignment/Map  
1125 format and SAMtools. *Bioinformatics* **25**, 2078-2079.
- 1126 **Liao, Y., Smyth, G.K., and Shi, W.** (2014). featureCounts: an efficient general purpose program for  
1127 assigning sequence reads to genomic features. *Bioinformatics* **30**, 923-930.
- 1128 **Lindgreen, S.** (2012). AdapterRemoval: easy cleaning of next-generation sequencing reads. *BMC Res*  
1129 *Notes* **5**, 337.
- 1130 **Llorente, B., Martinez-Garcia, J.F., Stange, C., and Rodriguez-Concepcion, M.** (2017).  
1131 Illuminating colors: regulation of carotenoid biosynthesis and accumulation by light. *Curr Opin*  
1132 *Plant Biol* **37**, 49-55.
- 1133 **Martin, G., Leivar, P., Ludevid, D., Tepperman, J.M., Quail, P.H., and Monte, E.** (2016).  
1134 Phytochrome and retrograde signalling pathways converge to antagonistically regulate a light-  
1135 induced transcriptional network. *Nat Commun* **7**, 11431.
- 1136 **McCarthy, D.J., Chen, Y., and Smyth, G.K.** (2012). Differential expression analysis of multifactor  
1137 RNA-Seq experiments with respect to biological variation. *Nucleic Acids Res* **40**, 4288-4297.
- 1138 **Mechin, V., Damerval, C., and Zivy, M.** (2007). Total protein extraction with TCA-acetone. *Methods*  
1139 *Mol Biol* **355**, 1-8.
- 1140 **Nisar, N., Li, L., Lu, S., Khin, N.C., and Pogson, B.J.** (2015). Carotenoid metabolism in plants. *Mol*  
1141 *Plant* **8**, 68-82.

- 1142 **Ossowski, S., Schneeberger, K., Clark, R.M., Lanz, C., Warthmann, N., and Weigel, D.** (2008).  
1143 Sequencing of natural strains of *Arabidopsis thaliana* with short reads. *Genome Res* **18**, 2024-  
1144 2033.
- 1145 **Osterlund, M.T., Hardtke, C.S., Wei, N., and Deng, X.W.** (2000). Targeted destabilization of HY5  
1146 during light-regulated development of *Arabidopsis*. *Nature* **405**, 462-466.
- 1147 **Paddock, T., Lima, D., Mason, M.E., Apel, K., and Armstrong, G.A.** (2012). *Arabidopsis* light-  
1148 dependent protochlorophyllide oxidoreductase A (PORA) is essential for normal plant growth  
1149 and development. *Plant molecular biology* **78**, 447-460.
- 1150 **Park, H., Kreunen, S.S., Cuttriss, A.J., DellaPenna, D., and Pogson, B.J.** (2002). Identification of  
1151 the carotenoid isomerase provides insight into carotenoid biosynthesis, prolamellar body  
1152 formation, and photomorphogenesis. *The Plant cell* **14**, 321-332.
- 1153 **Pecker, I., Gabbay, R., Cunningham, F.X., and Hirschberg, J.** (1996). Cloning and characterization  
1154 of the cDNA for lycopene  $\beta$ -cyclase from tomato reveals decrease in its expression during fruit  
1155 ripening. *Plant molecular biology* **30**, 807-819.
- 1156 **Pfaffl, M.** (2001). A new mathematical model for relative quantification in real-time RT-PCR. *Nucleic  
1157 Acids Research* **29**, 2002-2007.
- 1158 **Pogson, B., McDonald, K.A., Truong, M., Britton, G., and DellaPenna, D.** (1996). *Arabidopsis*  
1159 carotenoid mutants demonstrate that lutein is not essential for photosynthesis in higher plants.  
1160 *The Plant cell* **8**, 1627-1639.
- 1161 **Porra, R.J.** (2002). The chequered history of the development and use of simultaneous equations for  
1162 the accurate determination of chlorophylls a and b. *Photosynth Res* **73**, 149-156.
- 1163 **Porra, R.J., Thompson, W.A., and Kriedemann, P.E.** (1989). Determination of accurate extinction  
1164 coefficients and simultaneous equations for assaying chlorophylls a and b extracted with four  
1165 different solvents: verification of the concentration of chlorophyll standards by atomic  
1166 absorption spectroscopy. *Biochim. Biophys. Acta* **975**, 384-394.
- 1167 **Rebeiz, C.A., Mattheis, J.R., Smith, B.B., Rebeiz, C.C., and Dayton, D.F.** (1975). Chloroplast  
1168 biogenesis. Biosynthesis and accumulation of protochlorophyll by isolated etioplasts and  
1169 developing chloroplasts. *Arch Biochem Biophys* **171**, 549-567.
- 1170 **Robinson, M.D., and Smyth, G.K.** (2007). Moderated statistical tests for assessing differences in tag  
1171 abundance. *Bioinformatics* **23**, 2881-2887.
- 1172 **Robinson, M.D., and Smyth, G.K.** (2008). Small-sample estimation of negative binomial dispersion,  
1173 with applications to SAGE data. *Biostatistics* **9**, 321-332.
- 1174 **Robinson, M.D., and Oshlack, A.** (2010). A scaling normalization method for differential expression  
1175 analysis of RNA-seq data. *Genome biology* **11**, R25.
- 1176 **Robinson, M.D., McCarthy, D.J., and Smyth, G.K.** (2010). edgeR: a Bioconductor package for  
1177 differential expression analysis of digital gene expression data. *Bioinformatics* **26**, 139-140.
- 1178 **Rodriguez-Villalon, A., Gas, E., and Rodriguez-Concepcion, M.** (2009). Phytoene synthase activity  
1179 controls the biosynthesis of carotenoids and the supply of their metabolic precursors in dark-  
1180 grown *Arabidopsis* seedlings. *Plant Journal* **60**, 424-435.
- 1181 **Ronen, G., Cohen, M., Zamir, D., and Hirschberg, J.** (1999). Regulation of carotenoid biosynthesis  
1182 during tomato fruit development: expression of the gene for lycopene epsilon-cyclase is down-  
1183 regulated during ripening and is elevated in the mutant Delta. *Plant J* **17**, 341-351.
- 1184 **Ruckle, M.E., DeMarco, S.M., and Larkin, R.M.** (2007). Plastid signals remodel light signaling  
1185 networks and are essential for efficient chloroplast biogenesis in *Arabidopsis*. *Plant Cell* **19**,  
1186 3944-3960.

- 1187 **Schaub, P., Rodriguez-Franco, M., Cazzonelli, C.I., Alvarez, D., Wust, F., and Welsch, R.** (2018).  
1188 Establishment of an Arabidopsis callus system to study the interrelations of biosynthesis,  
1189 degradation and accumulation of carotenoids. *PLoS One* **13**, e0192158.
- 1190 **Schneeberger, K., Ossowski, S., Lanz, C., Juul, T., Petersen, A.H., Nielsen, K.L., Jorgensen, J.-E.,**  
1191 **Weigel, D., and Andersen, S.U.** (2009). SHOREmap: simultaneous mapping and mutation  
1192 identification by deep sequencing. *Nature methods* **6**, 550-551.
- 1193 **Schroeder, D.F., Gahrtz, M., Maxwell, B.B., Cook, R.K., Kan, J.M., Alonso, J.M., Ecker, J.R.,**  
1194 **and Chory, J.** (2002). De-etiolated 1 and damaged DNA binding protein 1 interact to regulate  
1195 Arabidopsis photomorphogenesis. *Curr Biol* **12**, 1462-1472.
- 1196 **Sergeant, M.J., Li, J.J., Fox, C., Brookbank, N., Rea, D., Bugg, T.D., and Thompson, A.J.** (2009).  
1197 Selective inhibition of carotenoid cleavage dioxygenases: phenotypic effects on shoot  
1198 branching. *J Biol Chem* **284**, 5257-5264.
- 1199 **Smyth, G.K.** (2004). Linear models and empirical bayes methods for assessing differential expression  
1200 in microarray experiments. *Stat Appl Genet Mol Biol* **3**, Article3.
- 1201 **Smyth, G.K.** (2005). limma: Linear Models for Microarray Data. In *Bioinformatics and Computational*  
1202 *Biology Solutions Using R and Bioconductor*, R. Gentleman, V. Carey, W. Huber, R. Irizarry,  
1203 and S. Dudoit, eds (Springer New York), pp. 397-420.
- 1204 **Sorefan, K., Booker, J., Haurogne, K., Goussot, M., Bainbridge, K., Foo, E., Chatfield, S., Ward,**  
1205 **S., Beveridge, C., Rameau, C., and Leyser, O.** (2003). MAX4 and RMS1 are orthologous  
1206 dioxygenase-like genes that regulate shoot branching in Arabidopsis and pea. *Genes &*  
1207 *development* **17**, 1469-1474.
- 1208 **Sperling, U., Franck, F., van Cleve, B., Frick, G., Apel, K., and Armstrong, G.A.** (1998). Etioplast  
1209 differentiation in arabidopsis: both PORA and PORB restore the prolamellar body and  
1210 photoactive protochlorophyllide-F655 to the cop1 photomorphogenic mutant. *Plant Cell* **10**,  
1211 283-296.
- 1212 **Stephenson, P.G., Fankhauser, C., and Terry, M.J.** (2009). PIF3 is a repressor of chloroplast  
1213 development. *Proceedings of the National Academy of Sciences of the United States of*  
1214 *America* **106**, 7654-7659.
- 1215 **Stirnberg, P., van De Sande, K., and Leyser, H.M.** (2002). MAX1 and MAX2 control shoot lateral  
1216 branching in Arabidopsis. *Development* **129**, 1131-1141.
- 1217 **Sundqvist, C., and Dahlin, C.** (1997). With chlorophyll pigments from prolamellar bodies to light-  
1218 harvesting complexes. *PHYSIOLOGIA PLANTARUM* **100**, 748-759.
- 1219 **Susek, R.E., Ausubel, F.M., and Chory, J.** (1993). Signal transduction mutants of Arabidopsis  
1220 uncouple nuclear CAB and RBCS gene expression from chloroplast development. *Cell* **74**, 787-  
1221 799.
- 1222 **Sytina, O.A., Heyes, D.J., Hunter, C.N., Alexandre, M.T., van Stokkum, I.H., van Grondelle, R.,**  
1223 **and Groot, M.L.** (2008). Conformational changes in an ultrafast light-driven enzyme  
1224 determine catalytic activity. *Nature* **456**, 1001-1004.
- 1225 **Van Norman, J.M., Zhang, J., Cazzonelli, C.I., Pogson, B.J., Harrison, P.J., Bugg, T.D., Chan,**  
1226 **K.X., Thompson, A.J., and Benfey, P.N.** (2014). Periodic root branching in Arabidopsis  
1227 requires synthesis of an uncharacterized carotenoid derivative. *Proceedings of the National*  
1228 *Academy of Sciences of the United States of America* **111**, E1300-1309.
- 1229 **Vijayalakshmi, K., Jha, A., and Dasgupta, J.** (2015). Ultrafast Triplet Generation and its  
1230 Sensitization Drives Efficient Photoisomerization of Tetra-cis-lycopene to All-trans-lycopene.  
1231 *The journal of physical chemistry. B* **119**, 8669-8678.



- 1232 **von Lintig, J., Welsch, R., Bonk, M., Giuliano, G., Batschauer, A., and Kleinig, H.** (1997). Light-  
1233 dependent regulation of carotenoid biosynthesis occurs at the level of phytoene synthase  
1234 expression and is mediated by phytochrome in *Sinapis alba* and *Arabidopsis thaliana* seedlings.  
1235 *Plant Journal* **12**, 625--634.
- 1236 **Walter, M.H., and Strack, D.** (2011). Carotenoids and their cleavage products: Biosynthesis and  
1237 functions. *Natural Product Reports* **28**, 663-692.
- 1238 **Walter, M.H., Stauder, R., and Tissier, A.** (2015). Evolution of root-specific carotenoid precursor  
1239 pathways for apocarotenoid signal biogenesis. *Plant science : an international journal of*  
1240 *experimental plant biology* **233**, 1-10.
- 1241 **Welsch, R., Arango, J., Bar, C., Salazar, B., Al-Babili, S., Beltran, J., Chavarriaga, P., Ceballos,**  
1242 **H., Tohme, J., and Beyer, P.** (2010). Provitamin A accumulation in cassava (*Manihot*  
1243 *esculenta*) roots driven by a single nucleotide polymorphism in a phytoene synthase gene. *Plant*  
1244 *Cell* **22**, 3348-3356.
- 1245 **Woodson, J.D., Perez-Ruiz, J.M., and Chory, J.** (2011). Heme synthesis by plastid ferrochelatase I  
1246 regulates nuclear gene expression in plants. *Curr Biol* **21**, 897-903.
- 1247 **Xu, X.M., Chi, W., Sun, X.W., Feng, P.Q., Guo, H.L., Li, J., Lin, R.C., Lu, C.M., Wang, H.Y.,**  
1248 **Leister, D., and Zhang, L.X.** (2016). Convergence of light and chloroplast signals for de-  
1249 etiolation through ABI4-HY5 and COP1. *Nature Plants* **2**.
- 1250 **Yu, Q., Ghisla, S., Hirschberg, J., Mann, V., and Beyer, P.** (2011). Plant carotene cis-trans  
1251 isomerase CRTISO: a new member of the FAD(RED)-dependent flavoproteins catalyzing non-  
1252 redox reactions. *The Journal of Biological Chemistry* **286**, 8666-8676.
- 1253 **Zhou, X., Welsch, R., Yang, Y., Alvarez, D., Riediger, M., Yuan, H., Fish, T., Liu, J.,**  
1254 **Thannhauser, T.W., and Li, L.** (2015). *Arabidopsis* OR proteins are the major  
1255 posttranscriptional regulators of phytoene synthase in controlling carotenoid biosynthesis.  
1256 *Proceedings of the National Academy of Sciences of the United States of America* **112**, 3558-  
1257 3563.
- 1258

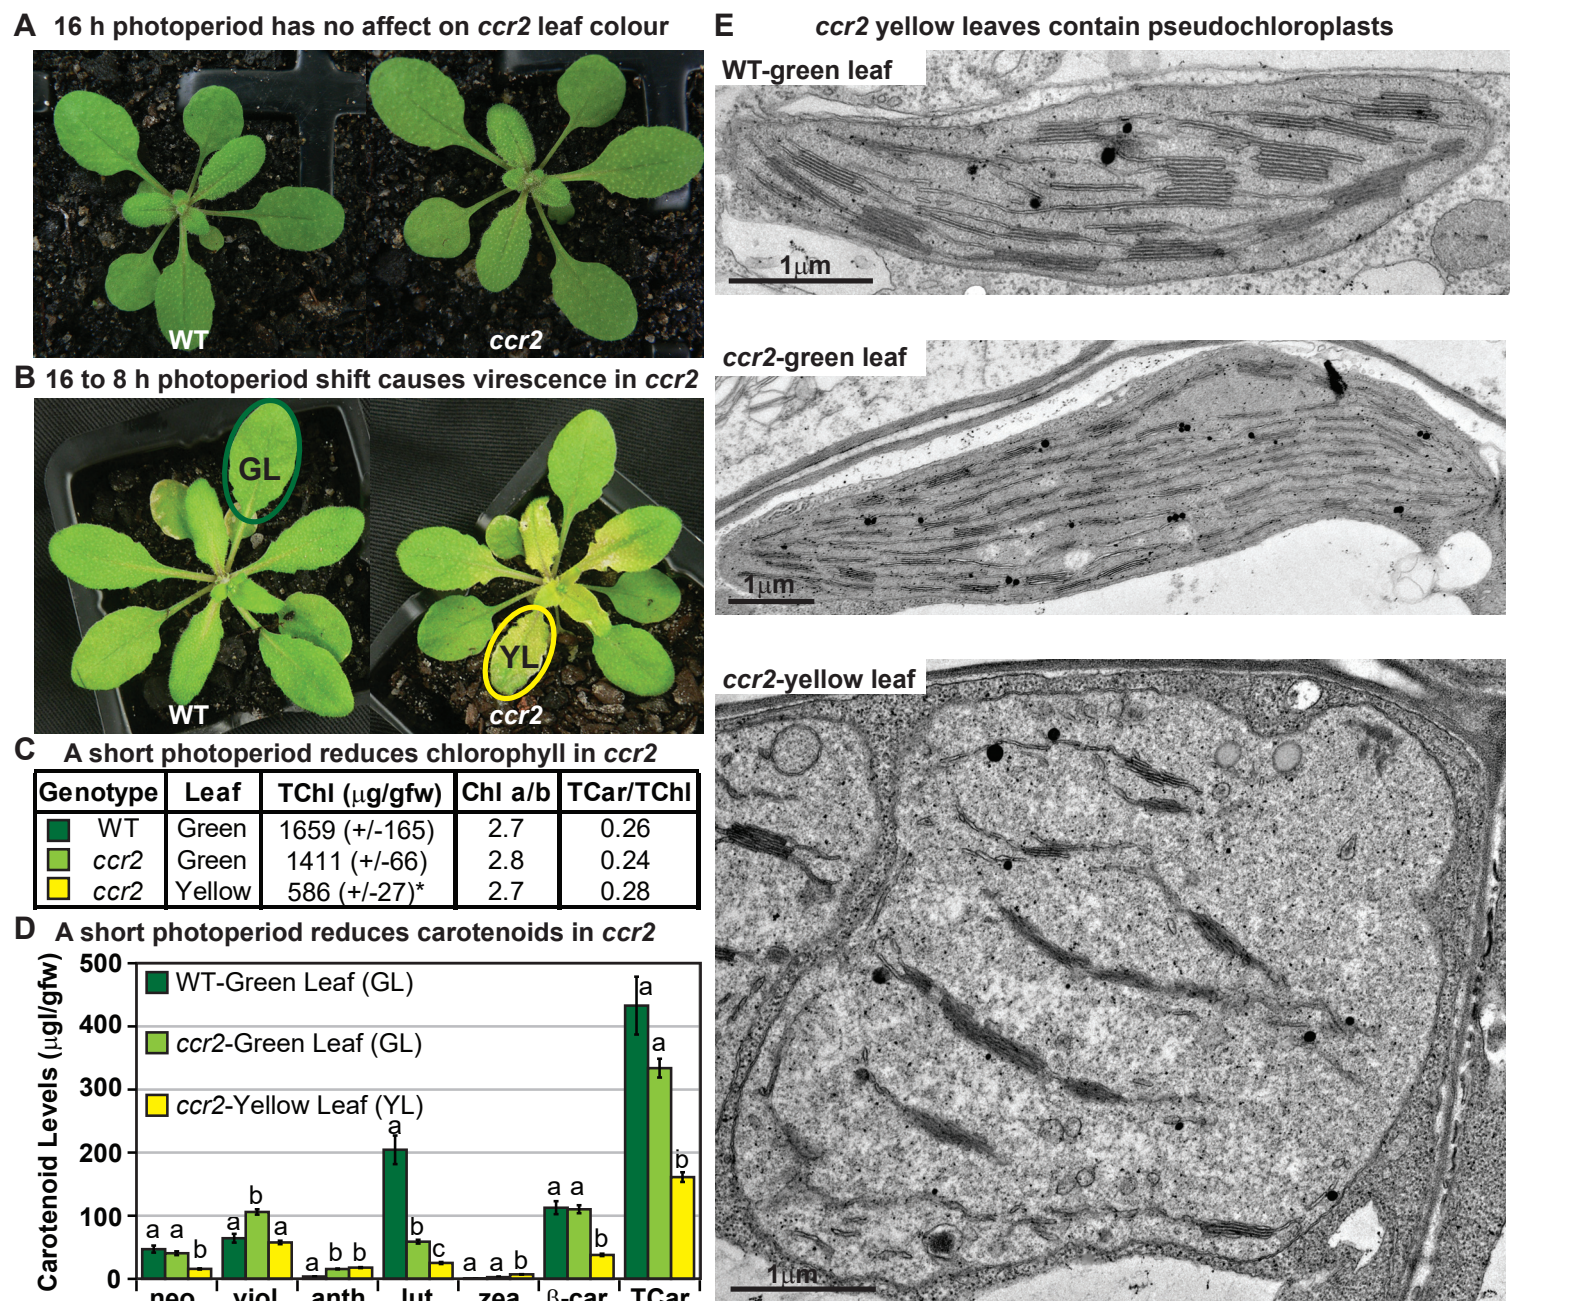

**Figure 1. A shorter photoperiod alters plastid development and pigmentation in *ccr2*.**

(A) Three-week-old wild type (WT) and *ccr2* plants growing under a 16-h light photoperiod.

(B) Three-week-old plants were shifted from a 16-h to 8-h photoperiod for one week and newly emerged or expanded leaves appeared yellow in *ccr2* (YL; yellow outline), while WT displayed green leaves (GL; green outline).

(C) Chlorophyll levels ( $\mu\text{g/gfw}$ ) and pigment ratios in green (WT and *ccr2*) and yellow (*ccr2*) leaves formed one week after a photoperiod shift from 16 h to 8 h. Standard error is shown for TChl ( $n=5$ , single leaf from 5 plants). Star denotes significant differences (ANOVA;  $p < 0.05$ ).

(D) Absolute carotenoid levels ( $\mu\text{g/gfw}$ ) in green (WT and *ccr2*) and yellow (*ccr2*) leaves formed one week after a photoperiod light shift from 16 h to 8 h. Values represent average and standard error bars are displayed ( $n=5$ , single leaf from 5 plants). Lettering denotes significance (ANOVA;  $p < 0.05$ ). Neoxanthin (neo), violaxanthin (viol), antheraxanthin (anth), lutein (lutein), zeaxanthin (zea),  $\beta$ -car ( $\beta$ -carotene), Total Chlorophyll (TChl), Chlorophyll a/b ratio (Chl a/b), Total carotenoids (TCar).

(E) Transmission electron micrograph images showing representative chloroplasts from WT and *ccr2* green leaf sectors as well as yellow leaf sectors of *ccr2*.

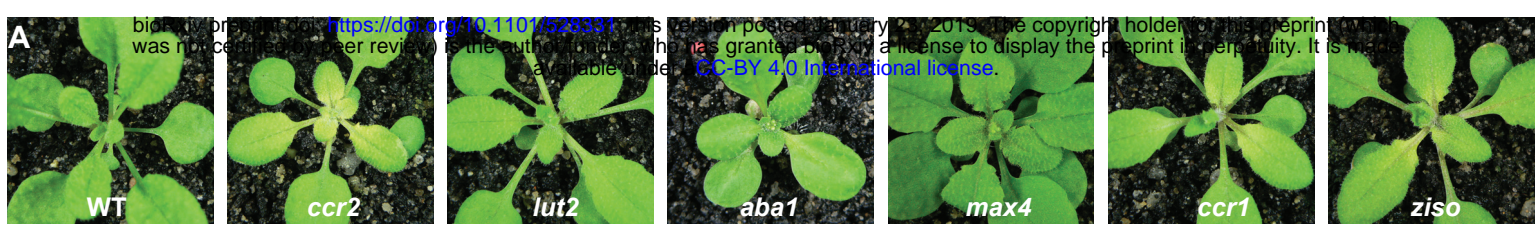

**B** *ccr2* leaves subjected to darkness have *cis*-carotenes

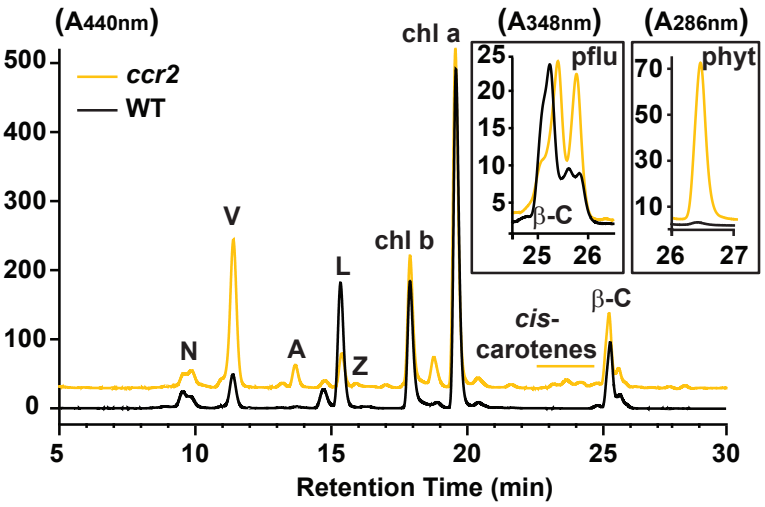

**C** *ccr2* leaves grown under 8 h light have *cis*-carotenes

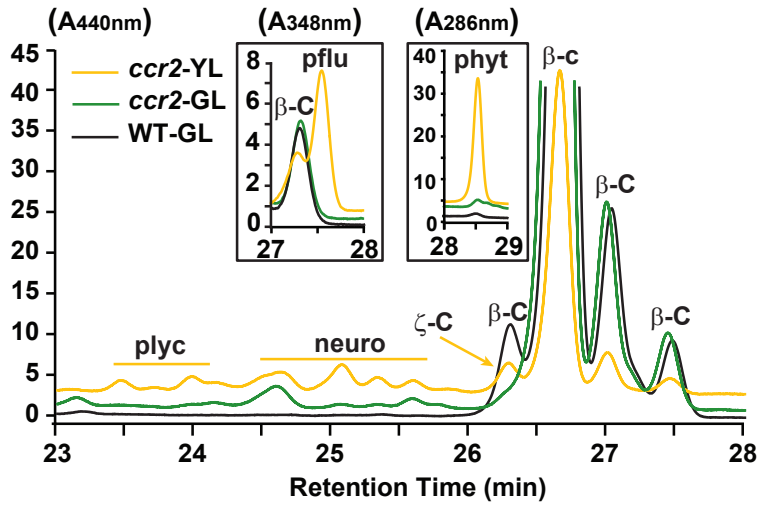

**D** *cis*-carotenes accumulate in young tissues from *ccr2*

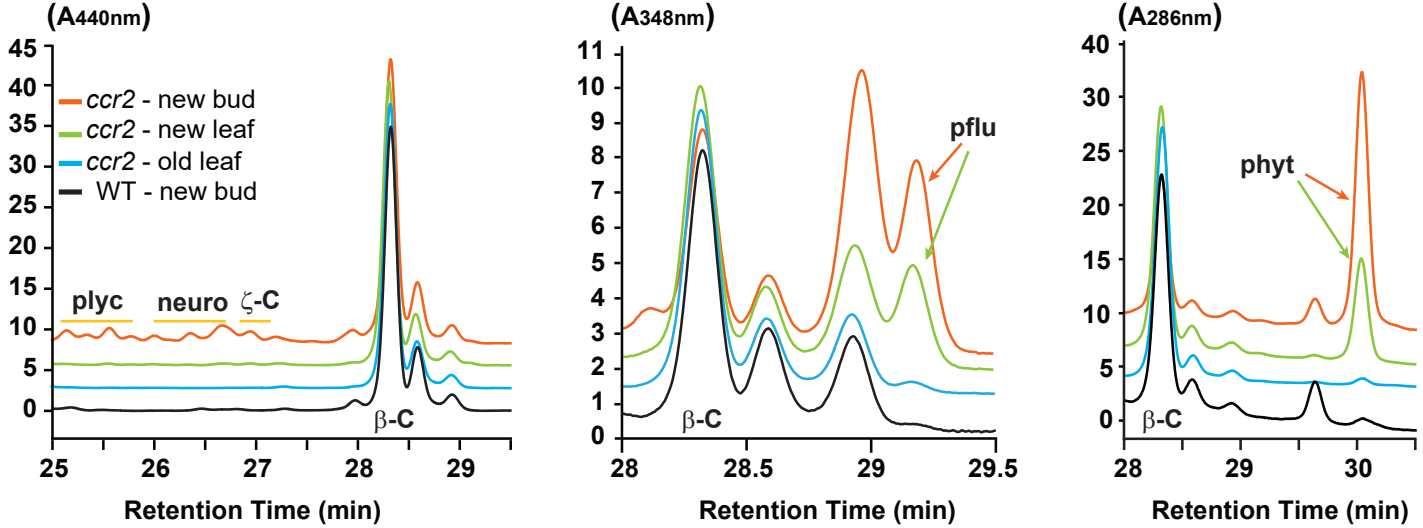

**Figure 2. Altered plastid development in *ccr2* is linked with *cis*-carotene accumulation and not to a perturbation in ABA or strigolactone.**

(A) Mutants that perturb the levels of lutein, ABA, SL and accumulate *cis*-carotenes (*ccr2*, *ccr1* and *ziso*) were grown for two weeks under a 16-h photoperiod and then shifted to a shorter 8-h photoperiod for one week. Representative images showing newly emerged and expanding leaves from multiple experimental and biological repetitions ( $n > 20$  plants per line) are displayed. Genetic alleles tested include Col-0 (WT), *ccr2.1* (carotenoid isomerase), *lut2.1* (epsilon lycopene cyclase), *aba1-3* (Ler background) (zeaxanthin epoxidase), *max4/ccd8* (carotenoid cleavage dioxygenase 8), *ccr1.1/sdg8* (set domain group 8) and *ziso1-3* ( $\zeta$ -carotene isomerase).

(B) Carotenoid profiles in rosette leaves from three-week-old plants grown under a 16-h photoperiod and subjected to 6-d of extended darkness.

(C) Carotenoid profiles in three-week-old rosette leaves from plants grown under a constant 8-h light photoperiod. Pigments were profiled in a yellow leaf (YL) and green leaf (GL) from WT and *ccr2*.

(D) Carotenoid profiles in newly emerged floral bud and rosette leaf tissues harvested from four-week-old plants growing under a 16-h photoperiod. Carotenoid profile traces of various tissue extracts from wild type (WT) and *ccr2* show pigments at wavelengths close to the absorption maxima of A440 (Neoxanthin; N, violaxanthin; V, antheraxanthin; A, lutein; L, zeaxanthin; Z,  $\beta$ -carotene isomers;  $\beta$ -C, chlorophyll a; Chl a, chlorophyll b; chl b, tetra-*cis*-lycopene; plic, neurosporene isomers; neuro, and  $\zeta$ -carotene;  $\zeta$ -C), A348 (phytofluene; pflu) and A286 (phytoene; phyt). HPLC profile y-axis units are in milli-absorbance units (mAU). HPLC traces are representative of multiple leaves from multiple experimental repetitions and retention times vary due to using different columns.

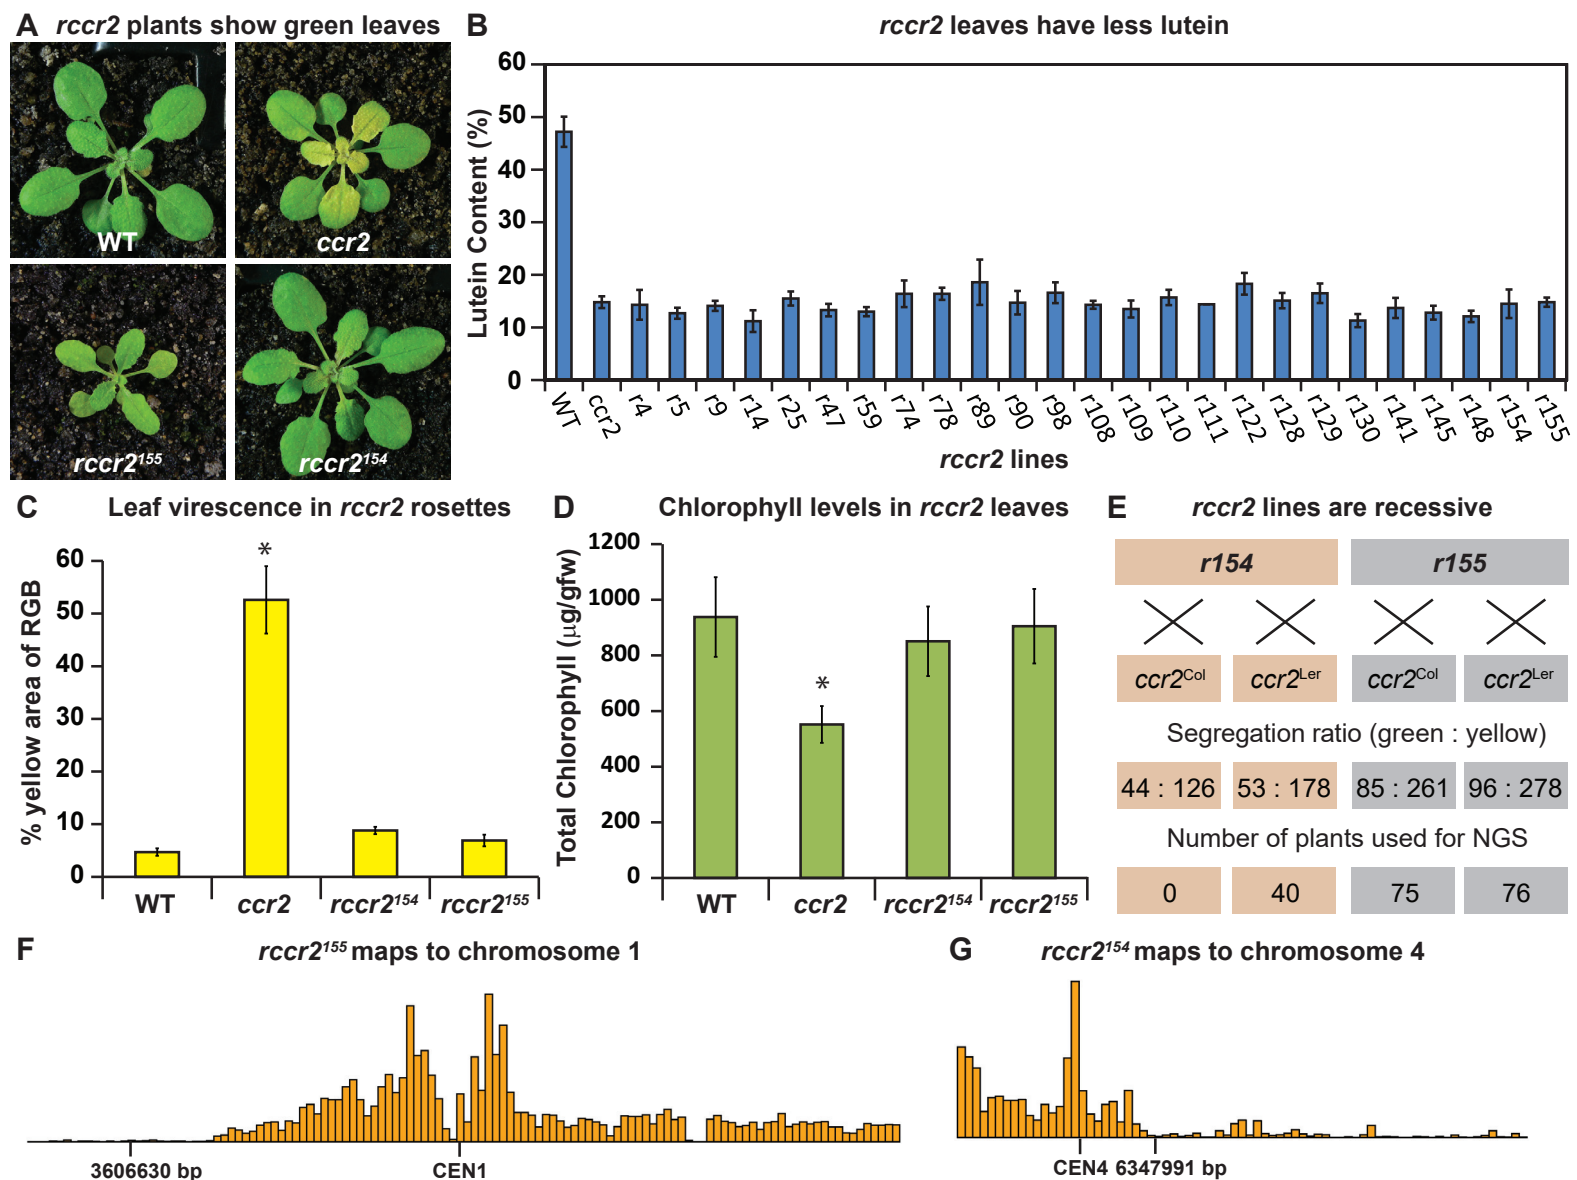

**Figure 3. A forward genetics screen identified revertant lines of *ccr2* having reduced lutein and normal chlorophyll accumulation when grown under a shorter photoperiod.**

(A) Representative images of *rccr2*<sup>155</sup> and *rccr2*<sup>154</sup> rosettes one week after shifting two-week old plants from a 16-h to 8-h photoperiod.

(B) Percentage lutein relative to total carotenoids in immature leaves from WT, *ccr2* and *rccr2* lines.

(C) The degree of leaf variegation detected in rosettes following a reduction in photoperiod. Leaf variegation (% of yellow relative to RGB) in WT, *ccr2*, *rccr2*<sup>154</sup> and *rccr2*<sup>155</sup> rosettes was quantified using the Lemnatec Scanlyser system and software.

(D) Total chlorophyll content in rosette leaves from WT, *ccr2*, *rccr2*<sup>154</sup> and *rccr2*<sup>155</sup> plants exposed to a shorter photoperiod.

(E) Segregation ratios of *rccr2*<sup>154</sup> and *rccr2*<sup>155</sup> after backcrossing to the *ccr2* parent in both Columbia (Col-0) and Landsberg erecta (Ler) ecotypes. (NGS; next generation sequencing)

(F) and (G) NGS of pooled leaf gDNA from a segregating population of *rccr2*<sup>155</sup> (F) and *rccr2*<sup>154</sup> (G) plants revealed less recombination surrounding SNPs at 3606630 bp and 6347991 bp, respectively. Error bars denote standard error of means (SEM) and stars represent statistical significance (ANOVA;  $p < 0.05$ ).

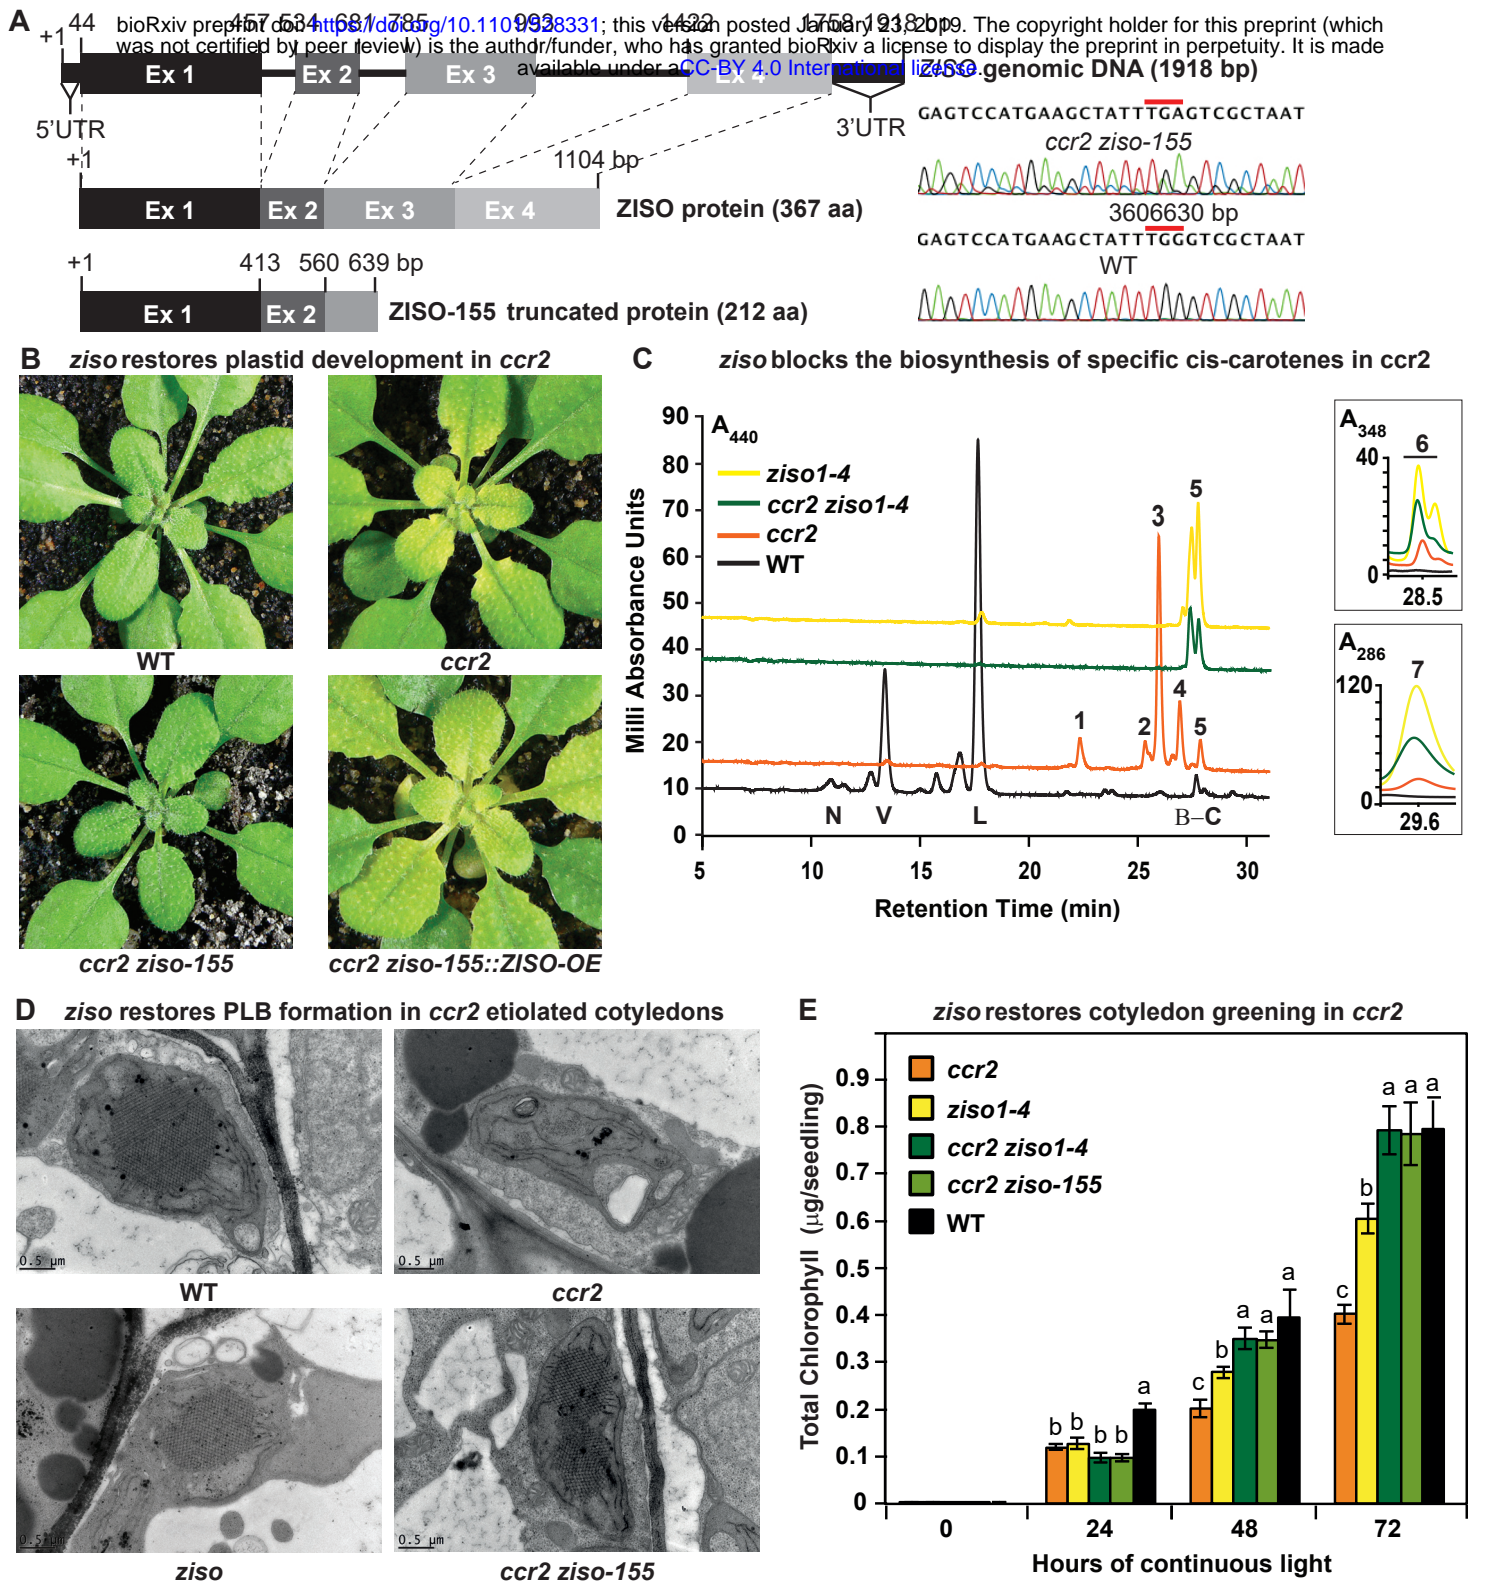

**Figure 4. *ziso* alters cis-carotene profile to restore PLB formation, plastid development and cotyledon greening in *ccr2*.** (A) Schematic structure of the wild type ZISO gDNA, ZISO protein and the truncated version of the ZISO-155 genomic sequence. *ccr2 ziso-155* contains a G>A mutation in AT1G10830 (3606630 bp) as confirmed by Sanger sequencing that results in a premature stop codon (TGA) in exon 3.

(B) Rosette images of WT, *ccr2*, *ccr2 ziso-155*, and *ccr2 ziso-155::ZISO-OE#5* showing leaf pigmentations in newly emerged leaves following a reduction in photoperiod. Images are representative of 84/89 T4 generation *ccr2 ziso-155* plants and six independent lines of *ccr2 ziso-155::ZISO-OE*.

(C) Carotenoid profiles of dark grown cotyledons from WT, *ccr2*, *ziso1-4*, and *ccr2 ziso1-4*. Wavelengths close to the absorption maxima of A440nm (major carotenoids and  $\zeta$ -carotene isomers), A348nm (phytofluene) and A286nm (phytoene) are shown. Neoxanthin (N); violaxanthin (V); lutein (L);  $\beta$ -carotene ( $\beta$ -C); neurosporene (1 and 2); tetra-cis-lycopene (3); pro-neurosporene (4);  $\zeta$ -carotene (5); phytofluene (6); phytoene (7).

(D) Transmission electron micrographs of a representative etioplast from 5-d-old dark grown cotyledons. The etioplasts of WT, *ziso* and *ccr2 ziso-155* show well-developed PLBs, while *ccr2* does not have any. Images are representative of more than 15 plastids from at least 5 TEM sections.

(E) Total chlorophyll levels in cotyledons following de-etiolation. WT, *ccr2*, *ziso1-4*, *ccr2 ziso-155*, and *ccr2 ziso1-4* were grown in darkness for 4 d, exposed to continuous white light and chlorophyll measured at 0, 24, 48 and 72-h. Letters within a time point denote statistical analysis by ANOVA with a post-hoc Tukey test ( $n > 20$  seedlings). Error bars denote standard error of means (SEM).

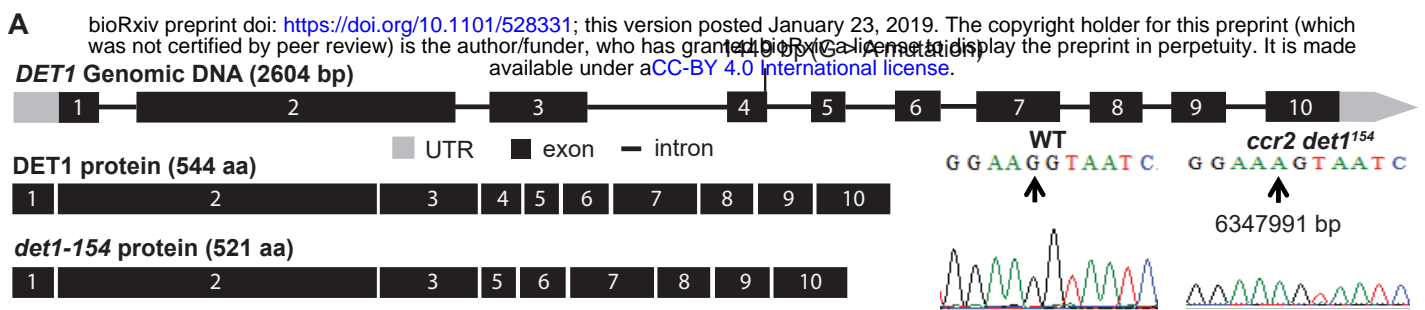

**B** *det1-154* restores plastid development in *ccr2*

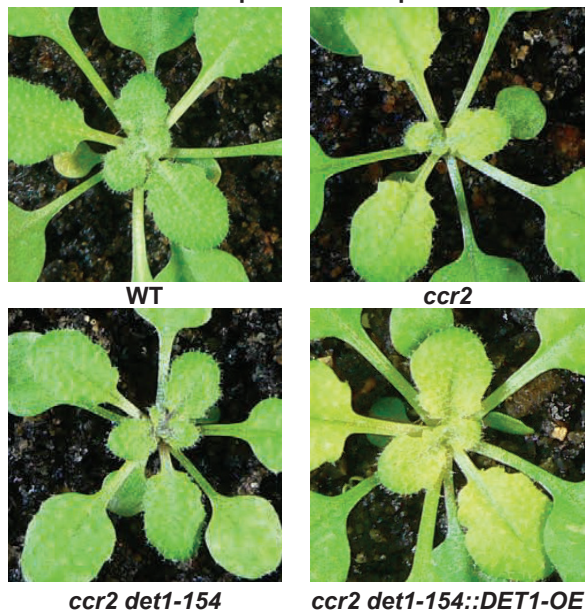

**C** *det1-154* reduces neurosporene and polycycopene in *ccr2*

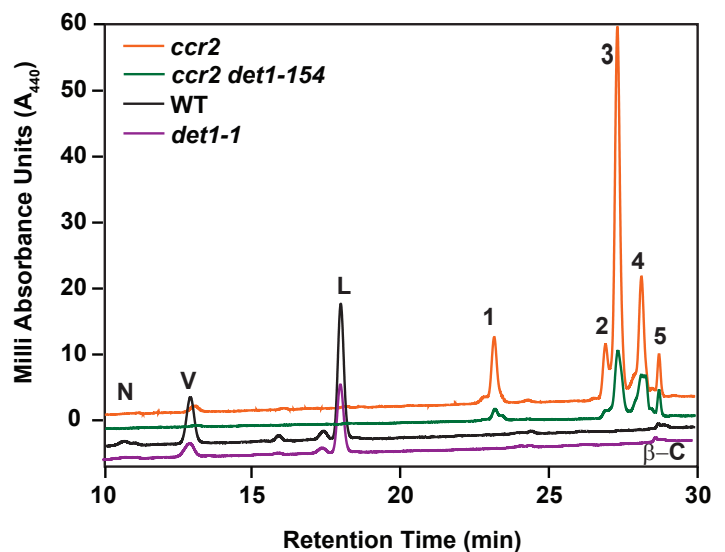

**D** *det1-154* promotes photomorphogenesis in *ccr2*

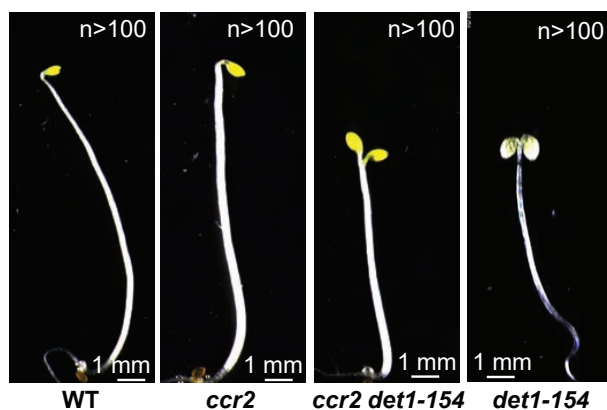

**E** *det1-154* restores cotyledon greening in *ccr2*

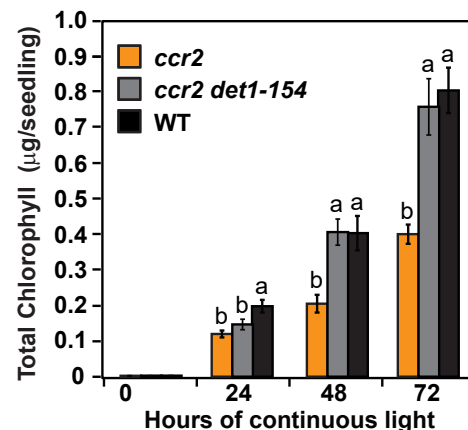

**Figure 5. *det1* restores PLB formation, plastid development and chlorophyll accumulation in *ccr2*.**

(A) Schematic structure of the wild type *DET1* gDNA, *DET1* protein, SNP confirmation and alternative spliced *DET1-154* protein. A G>A mutation at the end of exon 4 (1449 bp) of AT4G10180 (6347991 bp) was confirmed by Sanger sequencing that leads to the skipping of exon 4 (69 bp). The *DET1-154* splice variant produces a shorter protein (521 aa). Exon 4 comprises 23 amino acids in-frame, having homology to the six-hairpin glycosidase-like (IPR008928) domain.

(B) Rosette images of WT, *ccr2*, *ccr2 det1-154*, and *ccr2 det1-154::DET1-OE* showing leaf pigmentations in newly emerged leaves following a 16 h to 8 h photoperiod shift assay. Images are representative of 122/149 T1 generation *ccr2 det1-154* plants from 12 independent lines surviving Basta herbicide selection after being transformed with pEARLEY::*DET1-OE*.

(C) Carotenoid profiles of 7-d-old dark grown cotyledons from WT, *ccr2*, *ccr2 det1-154* and *det1-1* etiolated seedlings. Wavelengths close to the absorption maxima of A440 (major carotenoids and  $\zeta$ -carotene isomers) show neoxanthin (N); violaxanthin (V); lutein (L),  $\beta$ -carotene ( $\beta$ -C) in WT and neurosporene isomers (1 and 2) tetra-cis-lycopene (3); pro-neurosporene (4), and pro- $\zeta$ -carotene (5) in *ccr2* and to a less extent in *ccr2 det1-154*.

(D) Etiolated seedling morphology of WT, *ccr2*, *ccr2 det1-154* and *det1-154*. Seedlings were grown in the dark for 7 d on MS media without sucrose. Representative images (>100 seedlings from independent experiments) depict a typical apical hook for WT and *ccr2*, and shorter hypocotyl with open cotyledons for *ccr2 det1-154* and *det1-154*.

(E) Chlorophyll levels in cotyledons following de-etiolation. *ccr2*, *ccr2 det1-154* and WT were etiolated for 4 d in darkness and thereafter exposed to continuous white light. Chlorophyll measurements were taken at 0, 24, 48 and 72 h after de-etiolation. Letters within a time point denote statistical analysis by one-way ANOVA with a post-hoc Tukey test ( $n > 20$  seedlings). Error bars denote standard error of means.

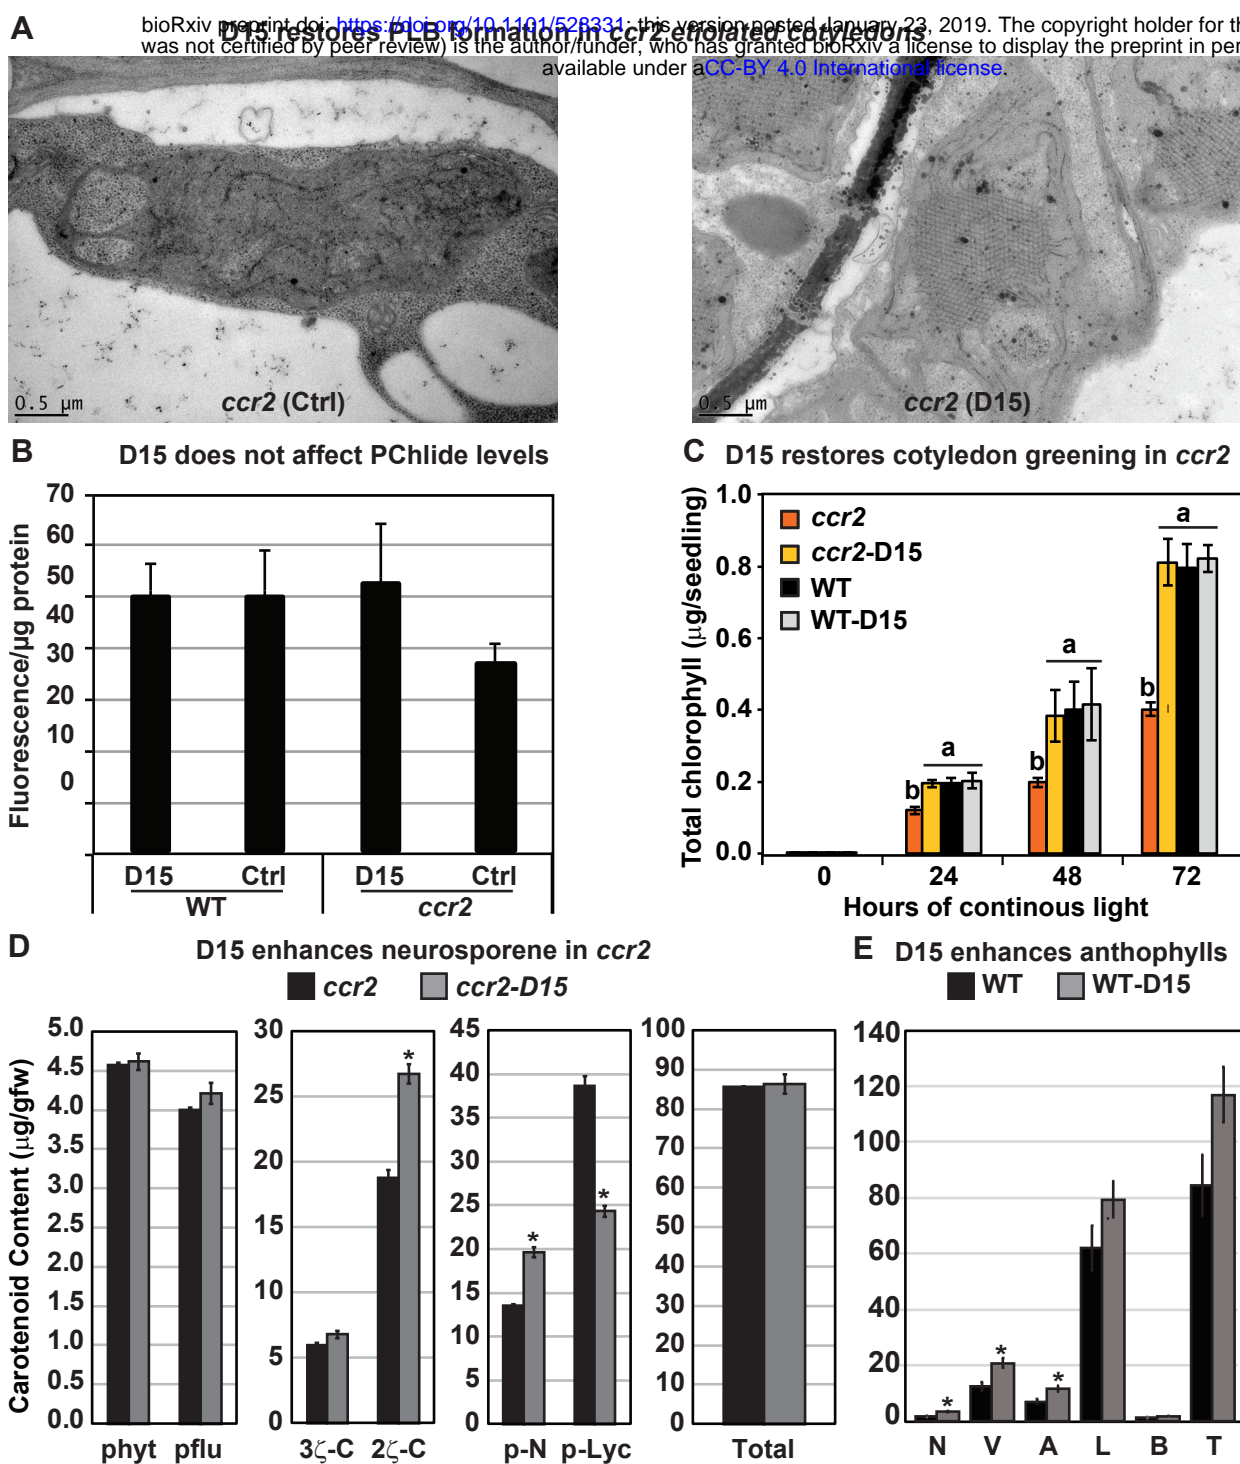

**Figure 6. The carotenoid cleavage dioxygenase (CCD) inhibitor, D15, restores PLB formation in etiolated *ccr2* seedlings, cotyledon greening following de-etiolation and alters cis-carotene accumulation.**

(A) Transmission electron micrographs of a representative etioplast from 5-d-old dark grown cotyledons reveal a well-developed PLB in *ccr2* treated with the D15, but not in *ccr2* treated with ethanol only (control; ctrl).

(B) Pchlide levels in Wild Type (WT) and *ccr2* treated +/- D15. Fluorescence was measured at 638 nm and 675 nm with an excitation at 440 nm. Net fluorescence of Pchlide was calculated and normalised to protein content.

(C) D15 restores chlorophyll accumulation in *ccr2* de-etiolated seedlings exposed to continuous light. Twenty seedlings from each of three biological replicates were harvested for chlorophyll determination in every 24 h under continuous light. Statistical analysis was by ANOVA with a post-hoc Tukey test (n = 20 seedlings).

(D) cis-carotene quantification in etiolated cotyledons of *ccr2* treated with D15. phytoene (phyt), phytofluene (pflu), tri-cis- $\zeta$ -carotene (3 $\zeta$ -C), di-cis- $\zeta$ -carotene (2 $\zeta$ -C), pro-neurosporene (p-N), tetra-cis-lycopene (p-lyc) and total cis-carotenes were quantified at absorption wavelengths providing maximum detection. Star denotes significance (ANOVA, p < 0.05). Error bars show standard error (n = 4).

(E) Quantification of carotenoid levels in etiolated tissues of WT treated with D15. Neoxanthin (N); violaxanthin (V); antheraxanthin (A), lutein (L),  $\beta$ -carotene ( $\beta$ -C) and total carotenoids (T) were quantified at a 440nm absorption wavelength providing maximum detection. Star denotes significance (ANOVA, p < 0.05). Data is representative of two independent experiments.

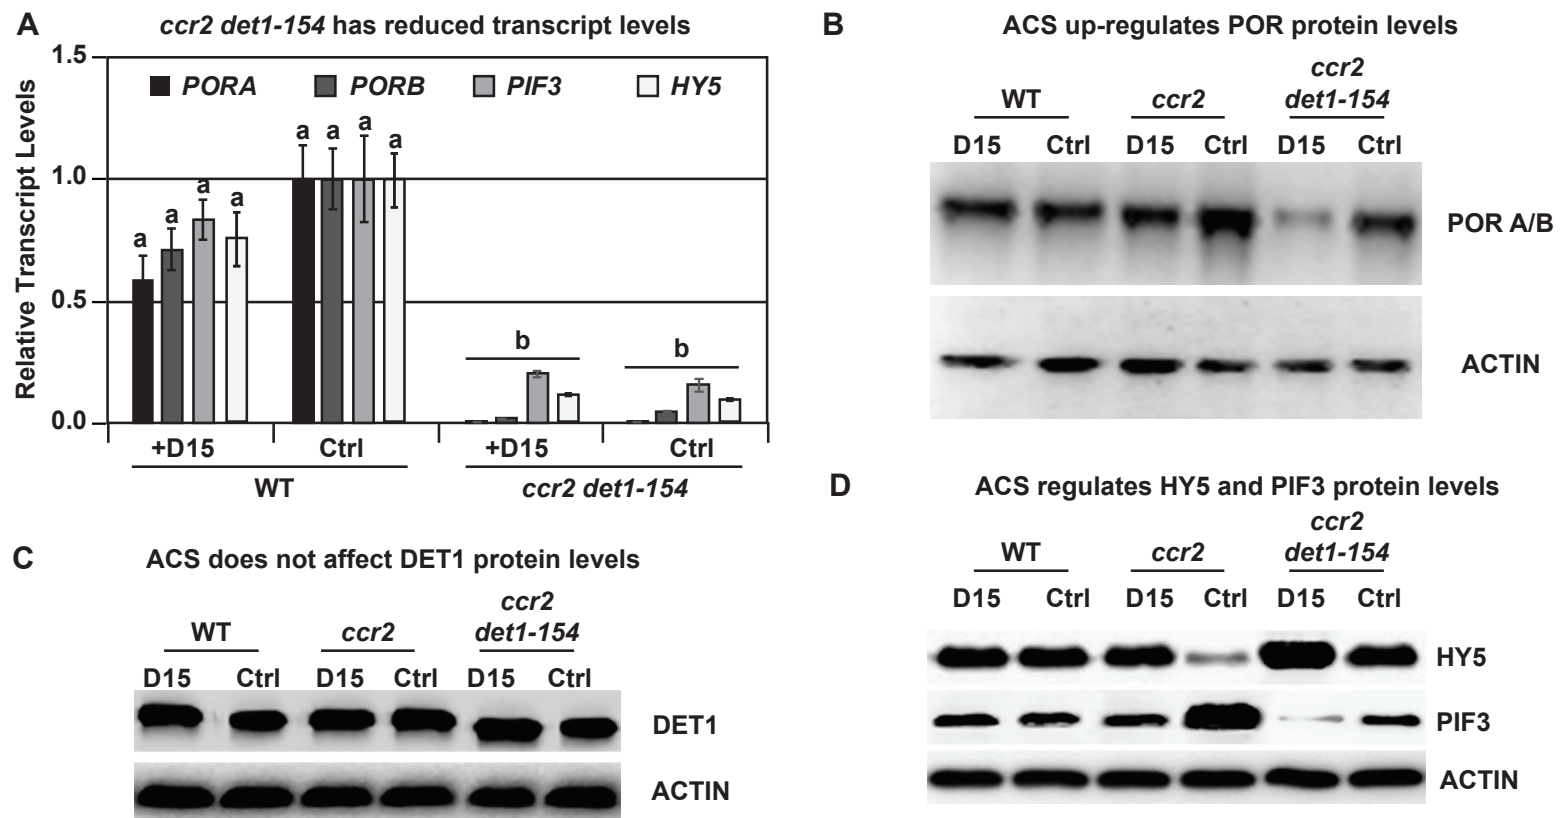

**Figure 7. Chemical inhibition of CCD activity identifies a *ccr2* generated ACS that acts in parallel to *det1-154* to post-transcriptionally regulate POR, HY5 and PIF3 protein levels.**

(A) Transcript levels of PORA, PORB, PIF3 and HY5 in WT and *ccr2 det1-154* etiolated seedlings growing on MS media +/- D15. Statistical analysis was performed using two-way ANOVA followed by a post-hoc paired t-test ( $p < 0.05$ ). Error bars represent standard error of means.

(B) Representative image of a western blot showing POR protein levels. Proteins were extracted from WT, *ccr2* and *ccr2 det1-154* etiolated seedlings grown on MS media +/- D15 (control; Ctrl). The membrane was re-probed using anti-Actin antibody as an internal control to normalise POR protein levels among different samples.

(C) Representative image of a western blot showing DET1 protein levels. Proteins were extracted from WT, *ccr2* and *ccr2 det1-154* etiolated seedlings grown on MS media +/- D15 (control; Ctrl). The membrane was re-probed using anti-Actin antibody as an internal control to normalise DET1 protein levels among different samples.

(D) Western blot image of HY5 and PIF3 protein levels. Proteins were extracted from WT, *ccr2* and *ccr2 det1-154* etiolated seedlings grown on MS media (Ctrl) or media containing D15. The membrane was re-probed using anti-Actin antibody as an internal control to normalise HY5/PIF3 protein levels among different samples.



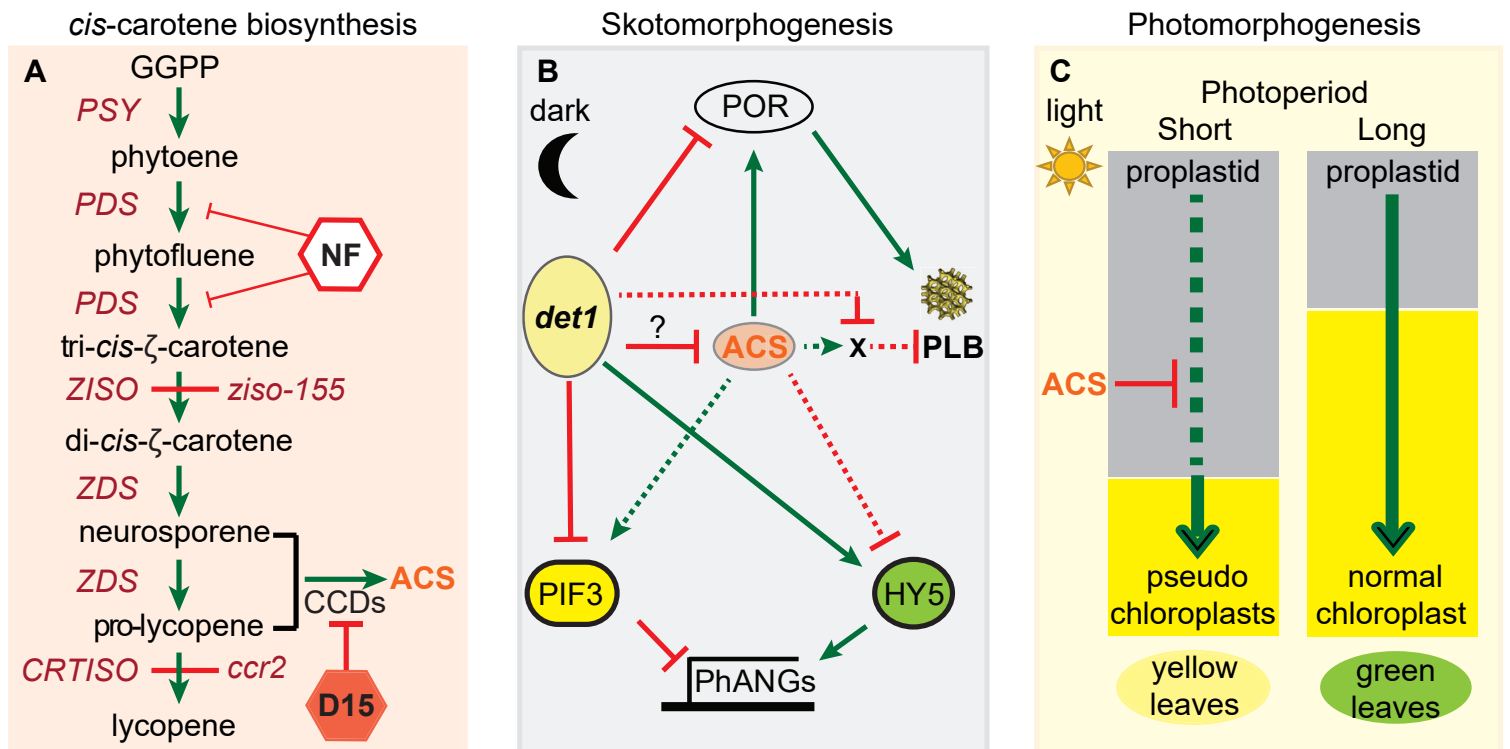

**Figure 8. A model describing how a cis-carotene derived cleavage product controls POR and PLB formation during plastid development.**

(A) *ccr2* can accumulate poly-*cis*-carotenes that undergo enzymatic cleavage via CCDs to generate an apocarotenoid signal (ACS). Norflurazon (NF) treatment of *ccr2* etiolated seedlings or the loss-of-function in *ziso-155* block the accumulation of downstream *cis*-carotenes required for the biosynthesis of ACS. Chemical treatment of etiolated seedlings with D15 inhibits CCD cleavage of pro-neurosporene and/or tetra-*cis*-lycopene isomers into ACS.

(B) During skotomorphogenesis, ACS promotes “Factor X”. Factor X negatively affects PLB formation. Factor X could act to stabilise proteins by disrupting ubiquitination, de-ubiquitination, protease mediated protein degradation, heterodimerization of transcription factors, coactivator concentrations, and/or interact with ligand binding sites of receptors. DET1 is a repressor of photomorphogenesis that post-transcriptionally regulate PIF3 and HY5 protein levels, which control PhANG expression. *det1* mutants lack POR and cannot make a PLB. ACS post-transcriptionally enhances POR protein levels, while *det1* blocks Factor X, thereby allowing PLB formation in *ccr2 det1-154*. *det1* reduces *cis*-carotene accumulation, and downregulates pro-neurosporene and tetra-*cis*-lycopene to maintain a threshold level of ACS.

(C) During photomorphogenesis, extended dark and/or shorter photoperiods, ACS manifests in newly emerged leaves from the *ccr2* shoot meristem and perturbed chloroplast development and chlorophyll accumulation causing a yellow leaf variegation phenotype. Green arrows and red lines represent positive and negative regulation, respectively. Abbreviations: PSY, phytoene synthase; PDS, phytoene desaturase, ZDS, ζ-carotene desaturase; ZISO, ζ-carotene isomerase; CRTISO, carotenoid isomerase; *det1-154*, DEETIOLATED1-154; D15, inhibitor of CCD activity; CCD, carotenoid cleavage dioxygenase; *ccr2*, CRTISO mutant.

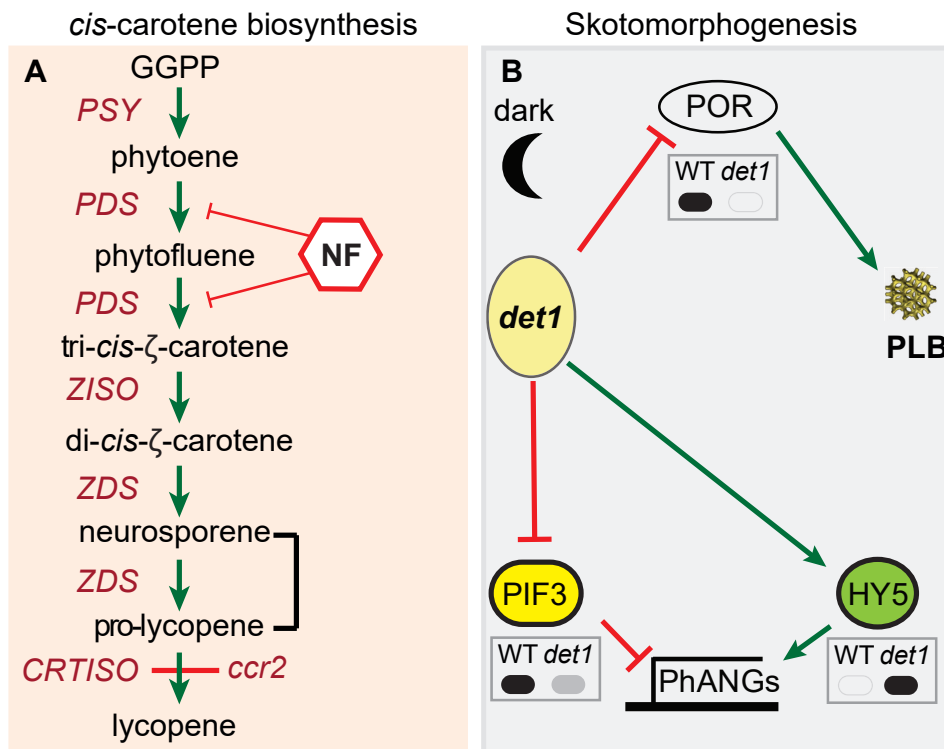

**Supplemental Figure 1. A model for cis-carotene biosynthesis and regulation of PLB formation during skotomorphogenesis.**

A) A pathway for cis-carotene biosynthesis. The carotenoid isomerase mutant (*ccr2*) accumulates cis-carotenes in etiolated seedlings. Norflurazon (NF) inhibits cis-carotene accumulation.

B) Control of prolamellar body (PLB) formation and protein levels during skotomorphogenesis. DET1 acts as a repressor of photomorphogenesis in etiolated tissues to maintain high protein levels of PIF3, which reduce PhANG expression. Upon de-etiolation, DET1 and PIF3 protein levels decline and *det1* mutants accumulate HY5 protein, which promotes the expression of PhANGs. *det1* mutants do not accumulate PORA proteins and do not form a PLB in etioplasts. Grey insert boxes digitally represent published western protein blots for PORA (Lebedev et al., 1995), PIF3 (Dong et al., 2014) and HY5 (Osterlund et al., 2000) in WT and *det1* mutant genotypes. Solid black and grey fills represents high and low protein expression, respectively. Green arrows and red lines represent positive and negative regulation, respectively. Abbreviations: PSY, phytoene synthase; PDS, phytoene desaturase, ZDS,  $\zeta$ -carotene desaturase; ZISO,  $\zeta$ -carotene isomerase; CRTISO, carotenoid isomerase

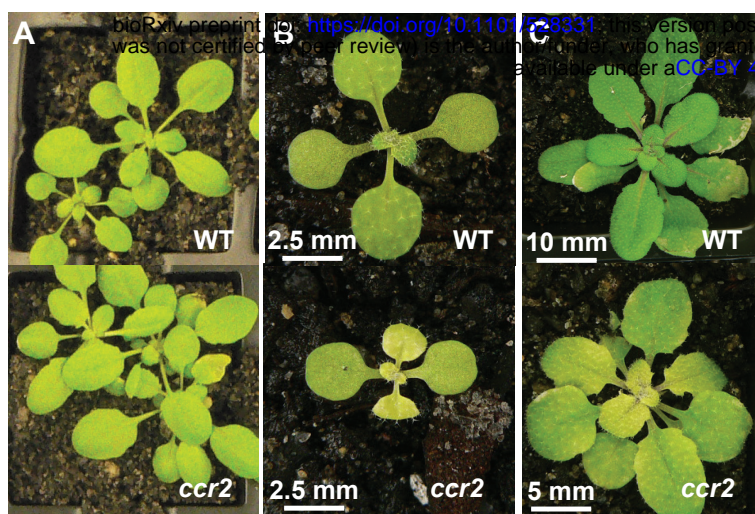

**D**

| Tissue         | Photoperiod (h) | Genotype    | Total                  |
|----------------|-----------------|-------------|------------------------|
| Rosette Leaves | 16              | WT          | <sup>a</sup> 980 ± 148 |
|                | 16              | <i>ccr2</i> | <sup>a</sup> 789 ± 166 |
|                | 8               | WT          | <sup>a</sup> 793 ± 114 |
|                | 8               | <i>ccr2</i> | <sup>b</sup> 468 ± 56  |

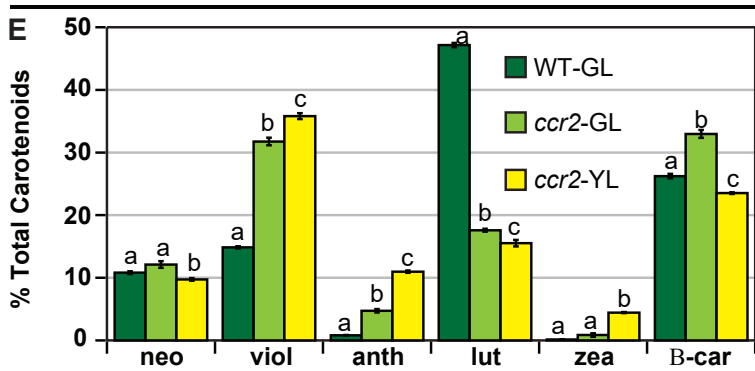

**Supplemental Figure 2. A shorter photoperiod promotes leaf variegation affecting chlorophyll levels and carotenoid composition in *ccr2*.**

(A) WT and *ccr2* plants were grown under a lower intensity of light (50  $\mu\text{mol m}^{-2} \text{s}^{-1}$ ) and representative images taken 14 DAG.

(B) and (C) WT and *ccr2* plants were grown under a very short 8 h photoperiod and representative images taken after 14 (B) and 21 (C) days of growth.

(D) Chlorophyll content in immature leaves that recently emerged from WT and *ccr2* rosettes 14 DAG. Values represent the average and standard deviations of total chlorophyll content ( $\mu\text{g/gfw}$ ) from a single leaf sector ( $n=2-7$  plants). Lettering denotes significance (ANOVA,  $p < 0.05$ ).

(E) Percentage carotenoid composition (relative to total) in green (WT and *ccr2*) and yellow (*ccr2*) virescent leaves developed one week after a 16 h to 8 h photoperiod shift. Values represent average and standard error of means are displayed ( $n=5$ , single leaf from 5 plants). Lettering denotes significance (paired t-test;  $p < 0.05$ ). Neoxanthin (neo), violaxanthin (viol), antheraxanthin (anth), lutein (lutein), zeaxanthin (zea),  $\beta$ -car ( $\beta$ -carotene), Green Leaf (GL), Yellow Leaf (YL).

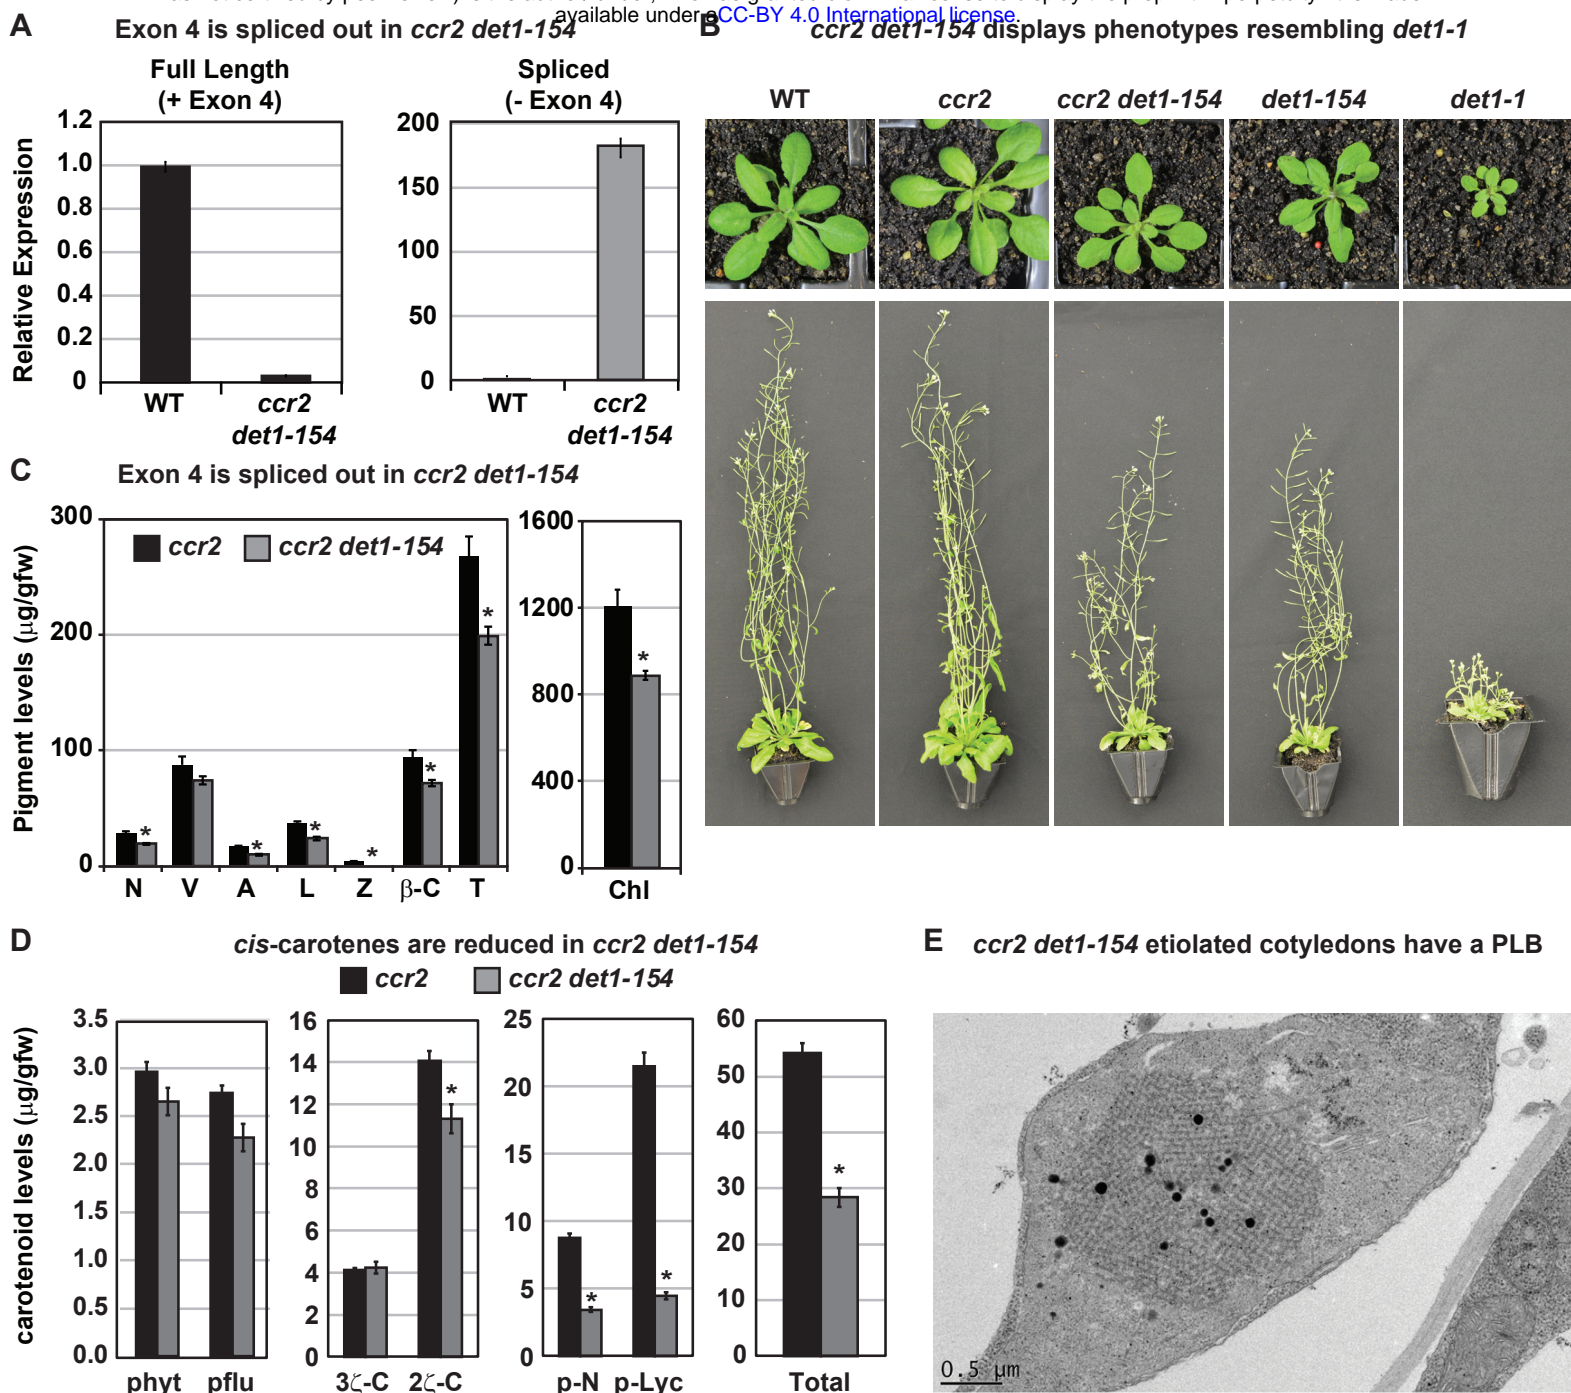

**Supplemental Figure 3. *det1-154* has alternative splicing and reduced pigments, *cis*-carotenes and restored PLB formation in *ccr2*.**

(A) qRT-PCR confirms alternative splicing of exon 4 in *ccr2 det1-154* leaf tissues. Primers were designed to quantify the full length (+ Exon 4; spanning exons 3-4 and 4-5 junctions) and the spliced (- Exon 4: spanning exon 3-5 and 6-7 junctions) DET1-154 mRNA transcript levels in WT and *ccr2 det1-154* leaf tissues, respectively. Standard error bars are shown (n=4).

(B) *ccr2 det1-154* displays phenotypes resembling *det1-1*, including a small rosette, shorter floral architecture and partially sterility in comparison to WT and *ccr2*.

(C) *ccr2 det1-154* shows reduced pigment levels compared to *ccr2*. Neoxanthin (N); violaxanthin (V); antheraxanthin (A), lutein (L),  $\beta$ -carotene ( $\beta$ -C), total carotenoids (T) and total chlorophylls (Chl) were quantified at a 440nm. Mean values are displayed and error bars denote standard error (n=3). Star denotes significance (ANOVA,  $p < 0.05$ ). Data is representative of multiple experiments.

(D) *det1-154* reduces *cis*-carotene content in *ccr2*. phytoene (phyt), phytofluene (pflu), tri-*cis*- $\zeta$ -carotene (3 $\zeta$ -C), di-*cis*- $\zeta$ -carotene (2 $\zeta$ -C), pro-neurosporene (p-N), tetra-*cis*-lycopene (p-lyc) and total *cis*-carotenes were quantified at absorption wavelengths providing maximum detection. Star denotes significance (ANOVA,  $p < 0.05$ ). Data is representative of two independent experiments and error bars show standard error (n=4).

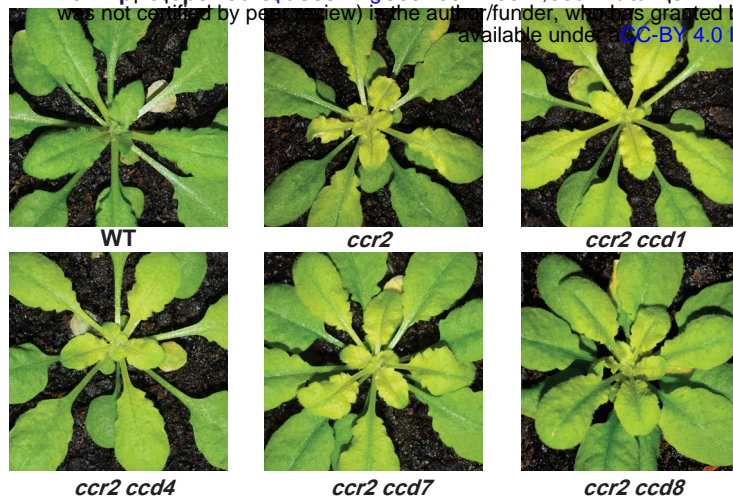

| Genotype         | Virescence phenotype (%) | Number of plants |
|------------------|--------------------------|------------------|
| Col              | 0                        | 10               |
| <i>ccr2</i>      | 100                      | 10               |
| <i>ccr2 ccd1</i> | 93                       | 30               |
| <i>ccr2 ccd4</i> | 100                      | 12               |
| <i>ccr2 ccd7</i> | 100                      | 10               |
| <i>ccr2 ccd8</i> | 100                      | 10               |

**Supplemental Figure 4. The loss-of-function in individual members of the carotenoid cleavage dioxygenase gene family cannot restore plastid development in *ccr2* rosettes.** Three-weeks-old WT, *ccr2*, *ccr2 ccd1*, *ccr2 ccd4*, *ccr2 ccd7*, and *ccr2 ccd8* (F3 homozygous double mutant lines) plants were shifted from a 16 to 8 h light photoperiod until newly formed leaves in the *ccr2* rosette displayed a yellow virescent phenotype.

(A) Representative images of plants showing newly developed leaves in the rosette.

(B) Quantification of leaf variegation in individual rosettes from *ccr2 ccd* double mutants. Data is representative of multiple independent experiments. Statistical analysis by ANOVA with post-hoc Tukey test showed no significant difference in the number of *ccr2* and *ccr2 ccd* plants displaying a virescent phenotype.

**Table 1.** A *cis*-carotene derived ACS acts in parallel to DET1 to control PLB formation

| <b>Germplasm</b>     | <b>Hypocotyl Length (mm)</b> |            | <b>Apical Hook</b> | <b>Cotyledon</b> | <b>% PLB (-D15)</b> | <b>% PLB (+D15)</b> | <b><i>cis</i>-carotenes</b>   |
|----------------------|------------------------------|------------|--------------------|------------------|---------------------|---------------------|-------------------------------|
| WT                   | normal                       | 13.4 ± 0.2 | yes                | closed           | 100                 | 100                 | none detected                 |
| <i>ccr2</i>          | normal                       | 13.8 ± 0.2 | yes                | closed           | 0                   | 85                  | phyt, pflu, ζ-C, p-N, p-L     |
| <i>ccr2 det1-154</i> | shorter                      | *8.3 ± 0.2 | no                 | open             | 69                  | 0                   | reduced <i>cis</i> -carotenes |
| <i>det1-154</i>      | shorter                      | *9.9 ± 0.1 | no                 | open             | ND                  | ND                  | phyt, pflu & ζ-C              |

ND; not determined; p-N; pro-neurosporene, p-L; pro-lycopene (tetra-*cis*-lycopene), phyt; phytoene, pflu; phytofluene, ζ-c; ζ-carotene, \*; denotes statistical significance (ANOVA, p<0.05).

**Supplemental Table 1. Immature *ccr2* tissues have an altered *cis*-carotene and xanthophyll composition.**

| Genotype    | Tissue       | Age | Percentage xanthophyll composition |            |     |      |      |     | Relative ratio |      |
|-------------|--------------|-----|------------------------------------|------------|-----|------|------|-----|----------------|------|
|             |              |     | lutein                             | $\beta$ -c | zea | anth | viol | neo | phyt           | pflu |
| WT          | Rosette leaf | yng | 50                                 | 26         | 0.0 | 0.5  | 10   | 13  | 0.00           | 0.00 |
|             | Rosette leaf | old | 48                                 | 27         | 0.1 | 0.6  | 11   | 13  | 0.00           | 0.00 |
|             | Floral bud   | yng | 50                                 | 24         | 0.0 | 0.6  | 15   | 10  | 0.00           | 0.00 |
|             | Floral bud   | old | 51                                 | 23         | 0.0 | 0.4  | 16   | 9   | 0.00           | 0.00 |
|             | Maximum SD   |     |                                    | 1          | 1   | 0.3  | 0.4  | 0   | 2              | ND   |
| <i>ccr2</i> | Rosette leaf | yng | 11                                 | 33         | 1.4 | 5.5  | 36   | 13  | 0.37           | 0.29 |
|             | Rosette leaf | old | 20                                 | 36         | 0.6 | 3.4  | 28   | 12  | 0.02           | 0.00 |
|             | Floral bud   | yng | 12                                 | 34         | 1.3 | 4.2  | 38   | 11  | 1.55           | 0.59 |
|             | Floral bud   | old | 17                                 | 34         | 1.0 | 3.5  | 33   | 12  | 0.76           | 0.38 |
|             | Maximum SD   |     |                                    | 1.2        | 0.6 | 0.2  | 0.7  | 0.7 | 0.3            | nd   |

Percentage of individual carotenoid levels relative to the total carotenoid content in different tissues from plants exposed to a 16 h photoperiod. Ratios of phytoene and phytofluene are relative to  $\beta$ -carotene. Data represent the average and maximum standard deviation (SD) for 2 biological replicates. Similar results were observed in independent experiments. Greyed highlighted values represent significant (t-test  $p < 0.05$ ) differences in immature younger (yng) relative to mature older (old) tissues.  $\beta$ -c;  $\beta$ -carotene, zea; zeaxanthin, anth; antheraxanthin, viol; violaxanthin, neo; neoxanthin, phyt; phytoene, pflu; phytofluene. nd; not determined.

**Supplemental Table 2. D15 and *ziso* restore PLB formation in *ccr2* etiolated cotyledons**

| Germplasm            | Treatment        | Number of etioplasts containing PLBs |     |           |        | Tukey Groups |
|----------------------|------------------|--------------------------------------|-----|-----------|--------|--------------|
|                      |                  | Total                                | PLB | Ratio (%) | SE (%) |              |
| WT                   | H <sub>2</sub> O | 90                                   | 90  | 100       | 0.0    | c            |
| WT                   | EtOH             | 64                                   | 64  | 100       | 0.0    | c            |
| WT                   | D15              | 48                                   | 48  | 100       | 0.0    | c            |
| <i>ccr2</i>          | H <sub>2</sub> O | 63                                   | 0   | 0         | 0.0    | a            |
| <i>ccr2</i>          | EtOH             | 72                                   | 0   | 0         | 0.0    | a            |
| <i>ccr2</i>          | D15              | 71                                   | 61  | 85        | 2.5    | b            |
| <i>ziso1-4</i>       | H <sub>2</sub> O | 73                                   | 48  | 66        | 2.1    | d            |
| <i>ziso1-4</i>       | D15              | 68                                   | 45  | 66        | 2.3    | d            |
| <i>ccr2 ziso1-4</i>  | H <sub>2</sub> O | 63                                   | 59  | 94        | 5.5    | c            |
| <i>ccr2 ziso-155</i> | H <sub>2</sub> O | 79                                   | 76  | 95        | 5.0    | c            |

PLB formation was examined in WT, *ccr2*, *ziso*, *ccr2 ziso* and *ccr2 ziso-155* cotyledons 7 DAG in the dark. D15 (CCD inhibitor), EtOH (control solvent for dissolving D15) and/or H<sub>2</sub>O was added to the growth media treatments.



**Supplemental Table 6.** Contra-regulated differential gene expression in etiolated seedlings and young leaves of *ccr2 ziso-155*

| GENE ID   | GENE         | Protein Encoding Description                                                                                                                    | Etiolated Seedlings |                 | Young Leaves |                 | <i>det1.1</i> | NF   |
|-----------|--------------|-------------------------------------------------------------------------------------------------------------------------------------------------|---------------------|-----------------|--------------|-----------------|---------------|------|
|           |              |                                                                                                                                                 | <i>ccr2</i>         | <i>ziso-155</i> | <i>ccr2</i>  | <i>ziso-155</i> |               |      |
| At1g09530 | PIF3         | Transcription factor interacts with photoreceptors and negatively regulates signalling                                                          | 30                  | 0.1             | 220          | 0.1             | ↓             | NS   |
| At4g10180 | DET1/FUS2    | Encodes a nuclear-localized protein that acts as a repressor of photomorphogenesis                                                              | 5.1                 | 0.1             | 5.9          | 0.2             | NS            | NS   |
| At3g19390 |              | Granulin repeat cysteine protease family protein                                                                                                | 4.4                 | NS              | 6.8          | NS              | NS            | NS   |
| At5g13210 |              | Unknown conserved expressed protein                                                                                                             | 3.8                 | NS              | 0.4          | NS              | ↑             | NS   |
| At3g45730 |              | Unknown expressed protein                                                                                                                       | 2.8                 | NS              | 2.4          | NS              | NS            | 10.6 |
| At5g43500 | ATARP9       | Encodes an expressed protein similar to actin-related proteins                                                                                  | 2.4                 | NS              | 2.2          | NS              | NS            | NS   |
| At5g48240 |              | Unknown expressed protein                                                                                                                       | 2.1                 | NS              | 2.2          | NS              | NS            | NS   |
| At2g32950 | COP1/FUS3    | Repressor of photomorphogenesis and induces skotomorphogenesis in the dark                                                                      | 2.0                 | 0.0             | 8.9          | 0.1             | ↑             | NS   |
| At5g11260 | HY5          | Transcription factor negatively regulated by COP1 and mutant shows ABA resistant phenotypes                                                     | 0.5                 | 8.1             | 0.3          | 8.4             | NS            | 2.8  |
| At4g02770 | PSAD1        | Expressed protein with similarity to photosystem I reaction center subunit II                                                                   | 0.5                 | NS              | 0.5          | NS              | ↑             | 0.15 |
| At3g17070 |              | Peroxidase family expressed protein                                                                                                             | 0.5                 | NS              | 0.5          | NS              | NS            | NS   |
| At2g31751 |              | Potential natural antisense gene, expressed protein                                                                                             | 0.4                 | NS              | 0.5          | NS              | NS            | NS   |
| At4g15560 | DXS/CLA1     | 1-deoxyxylulose 5-phosphate synthase activity involved in the MEP pathway                                                                       | 0.3                 | 4.2             | 0.1          | 16.2            | NS            | 0.42 |
| At4g34350 | ISPH/CLB6    | 4-hydroxy-3-methylbut-2-enyl diphosphate reductase involved in the MEP pathway                                                                  | 0.3                 | 9.4             | 0.2          | 11              | ↑             | NS   |
| At1g24510 | TCP-1        | T-complex expressed protein 1 epsilon subunit                                                                                                   | 0.3                 | 12.0            | 0.1          | 7.9             | NS            | NS   |
| At3g59010 | PME35        | Pectin methylesterase that regulates the cell wall mechanical strength                                                                          | 0.2                 | NS              | 0.4          | NS              | ↓             | NS   |
| At1g29930 | CAB1/LHCB1.3 | Subunit of light-harvesting complex II (LHCII), which absorbs light and transfers energy to the photosynthetic reaction center                  | 0.2                 | 13              | 0.2          | 11              | NS            | NS   |
| At2g05070 | LHCB2.2      | Light-harvesting chlorophyll a/b-binding (LHC) protein that constitute the antenna system of the photosynthetic apparatus.                      | 0.2                 | NS              | 0.2          | NS              | ↑             | NS   |
| At5g13630 | GUN5/CHLH    | Magnesium chelatase involved in plastid-to-nucleus signal transduction.                                                                         | 0.2                 | 17              | 0.2          | 20              | ↑             | 0.33 |
| At1g67090 | RBCS1a       | Member of the Rubisco small subunit (RBCS) multigene family and functions to yield sufficient Rubisco content for leaf photosynthetic capacity. | 0.1                 | 67              | 0.1          | 61              | NS            | NS   |

Notes: NS; not significant. Transcriptomic data; *det1.1* (Schroeder, 2001) and norflurazon (NF) (Koussevitzky, 2007).

**Supplemental Table 7.** *det1* reduced carotenoids and caused *cis*-carotenes to accumulate in leaves and etiolated tissues

| Genotype        | Tissue     | <i>cis</i> -carotenes<br>( $\mu\text{g/gfw}$ ) |       |              | Carotenoids<br>( $\mu\text{g/gfw}$ ) |      |      |      |     |            |       | Chlorophyll<br>( $\mu\text{g/gfw}$ ) |
|-----------------|------------|------------------------------------------------|-------|--------------|--------------------------------------|------|------|------|-----|------------|-------|--------------------------------------|
|                 |            | phyt                                           | pflu  | 3 $\zeta$ -C | neo                                  | viol | anth | lut  | zea | $\beta$ -c | total |                                      |
| WT              | leaves     | nd                                             | nd    | nd           | 37                                   | 47   | 2    | 151  | nd  | 96         | 333   | 1470                                 |
| <i>det1-1</i>   |            | trace                                          | trace | nd           | 15                                   | 32   | 0    | 70   | nd  | 52         | 170   | 728                                  |
| <i>det1-154</i> |            | trace                                          | trace | nd           | 19                                   | 35   | 0    | 73   | nd  | 61         | 188   | 818                                  |
|                 | SE         |                                                |       |              | 2                                    | 8    | 1    | 9    | 0   | 6          | 22    | 96                                   |
| WT              | cotyledons | nd                                             | nd    | nd           | 1.0                                  | 6.5  | 0.7  | 17.5 | nd  | 0.8        | 26.5  | nd                                   |
| <i>det1-1</i>   |            | 0.19                                           | 0.15  | 0.08         | nd                                   | 1.8  | nd   | 6.8  | nd  | 0.4        | 8.8   | nd                                   |
|                 |            | SE                                             | 0.00  | 0.00         | 0.01                                 | 0.1  | 0.7  | 0.1  | 1.7 |            | 0.1   | 2.6                                  |

Absolute carotenoid and chlorophyll levels in young emerging leaves (16 h photoperiod) and etiolated cotyledons (7-d-old). Data represent the average and maximum standard error (SE; n=3 to 12 biological replicates). Similar results were observed in independent experiments. Grey shading denote significant differences compared to WT (ANOVA;  $p < 0.05$ ).  $\beta$ -c;  $\beta$ -carotene, zea; zeaxanthin, anth; antheraxanthin, viol; violaxanthin, neo; neoxanthin, phyt; phytoene, pflu; phytofluene, 3 $\zeta$ -C; tri-*cis*- $\zeta$ -carotene, nd; not detectable.

**Supplemental Table 8. Primer sequences used for qPCR and *ccr2 det154* characterisation**

| PCR primers  | Purpose                                 | Sequence                        |
|--------------|-----------------------------------------|---------------------------------|
| det1-short-F | Amplifies <i>det1</i> exon 3-5 junction | GAATGAAGAATCAGATAACGTAATGgttcag |
| det1-short-R | Amplifies <i>det1</i> exon 6-7 junction | TGGTAAAGATCTTCTGCTGAGTTCTGA     |
| det1-long-F  | Amplifies <i>det1</i> exon 3-4          | TGAAGAATCAGATAACGTAATGAGAGTTC   |
| det1-long-R  | Amplifies <i>det1</i> exon 4-5          | TGATCAGCACTTCTTGTTACCCCA        |
| PP2A-F       | protein phosphatase 2A House Keeper     | CTTCGTGCAGTATCGCTTCTC           |
| PP2A-R       | protein phosphatase 2A House Keeper     | ATTGGAGAGCTTGATTTGCG            |
| PORA-F       | protochlorophyllide oxidoreductase a    | TTTCGGAGCAAAGCAAAGC             |
| PORA-R       | protochlorophyllide oxidoreductase a    | TTTGTGACTGATGGAGTTGAAG          |
| PORB-F       | protochlorophyllide oxidoreductase b    | CCCTTCAAAGCGTCTCATC             |
| PORB-R       | protochlorophyllide oxidoreductase b    | AATCTCCTCCATCAATCATAGC          |
| HY5-F        | elongated hypocotyl-5                   | GAGAAAGAGAACAAGCGGCTGAAG        |
| HY5-R        | elongated hypocotyl-5                   | AGCATCTGGTTCTCGTTCTGAAGA        |
| PIF3-F       | phytochorme interacting factor 3        | TTGGCTCGGGTAATAGTCTCGATG        |
| PIF3-R       | phytochorme interacting factor 3        | CCTGCTTCCTTTCTTCCATCTCCT        |
